# Supplementary material for: Comparative Analysis of the Two Acinetobacter baumannii Multilocus Sequence Typing (MLST) Schemes
Source: PubMed Central journal article supplement (PMC6510311; doi:10.3389/fmicb.2019.00930), 2019-05-03

Oxf\_cpn60  $y = 0.48x - 0.0011$   $R^2=0.936247723070103$

**Figure S3**

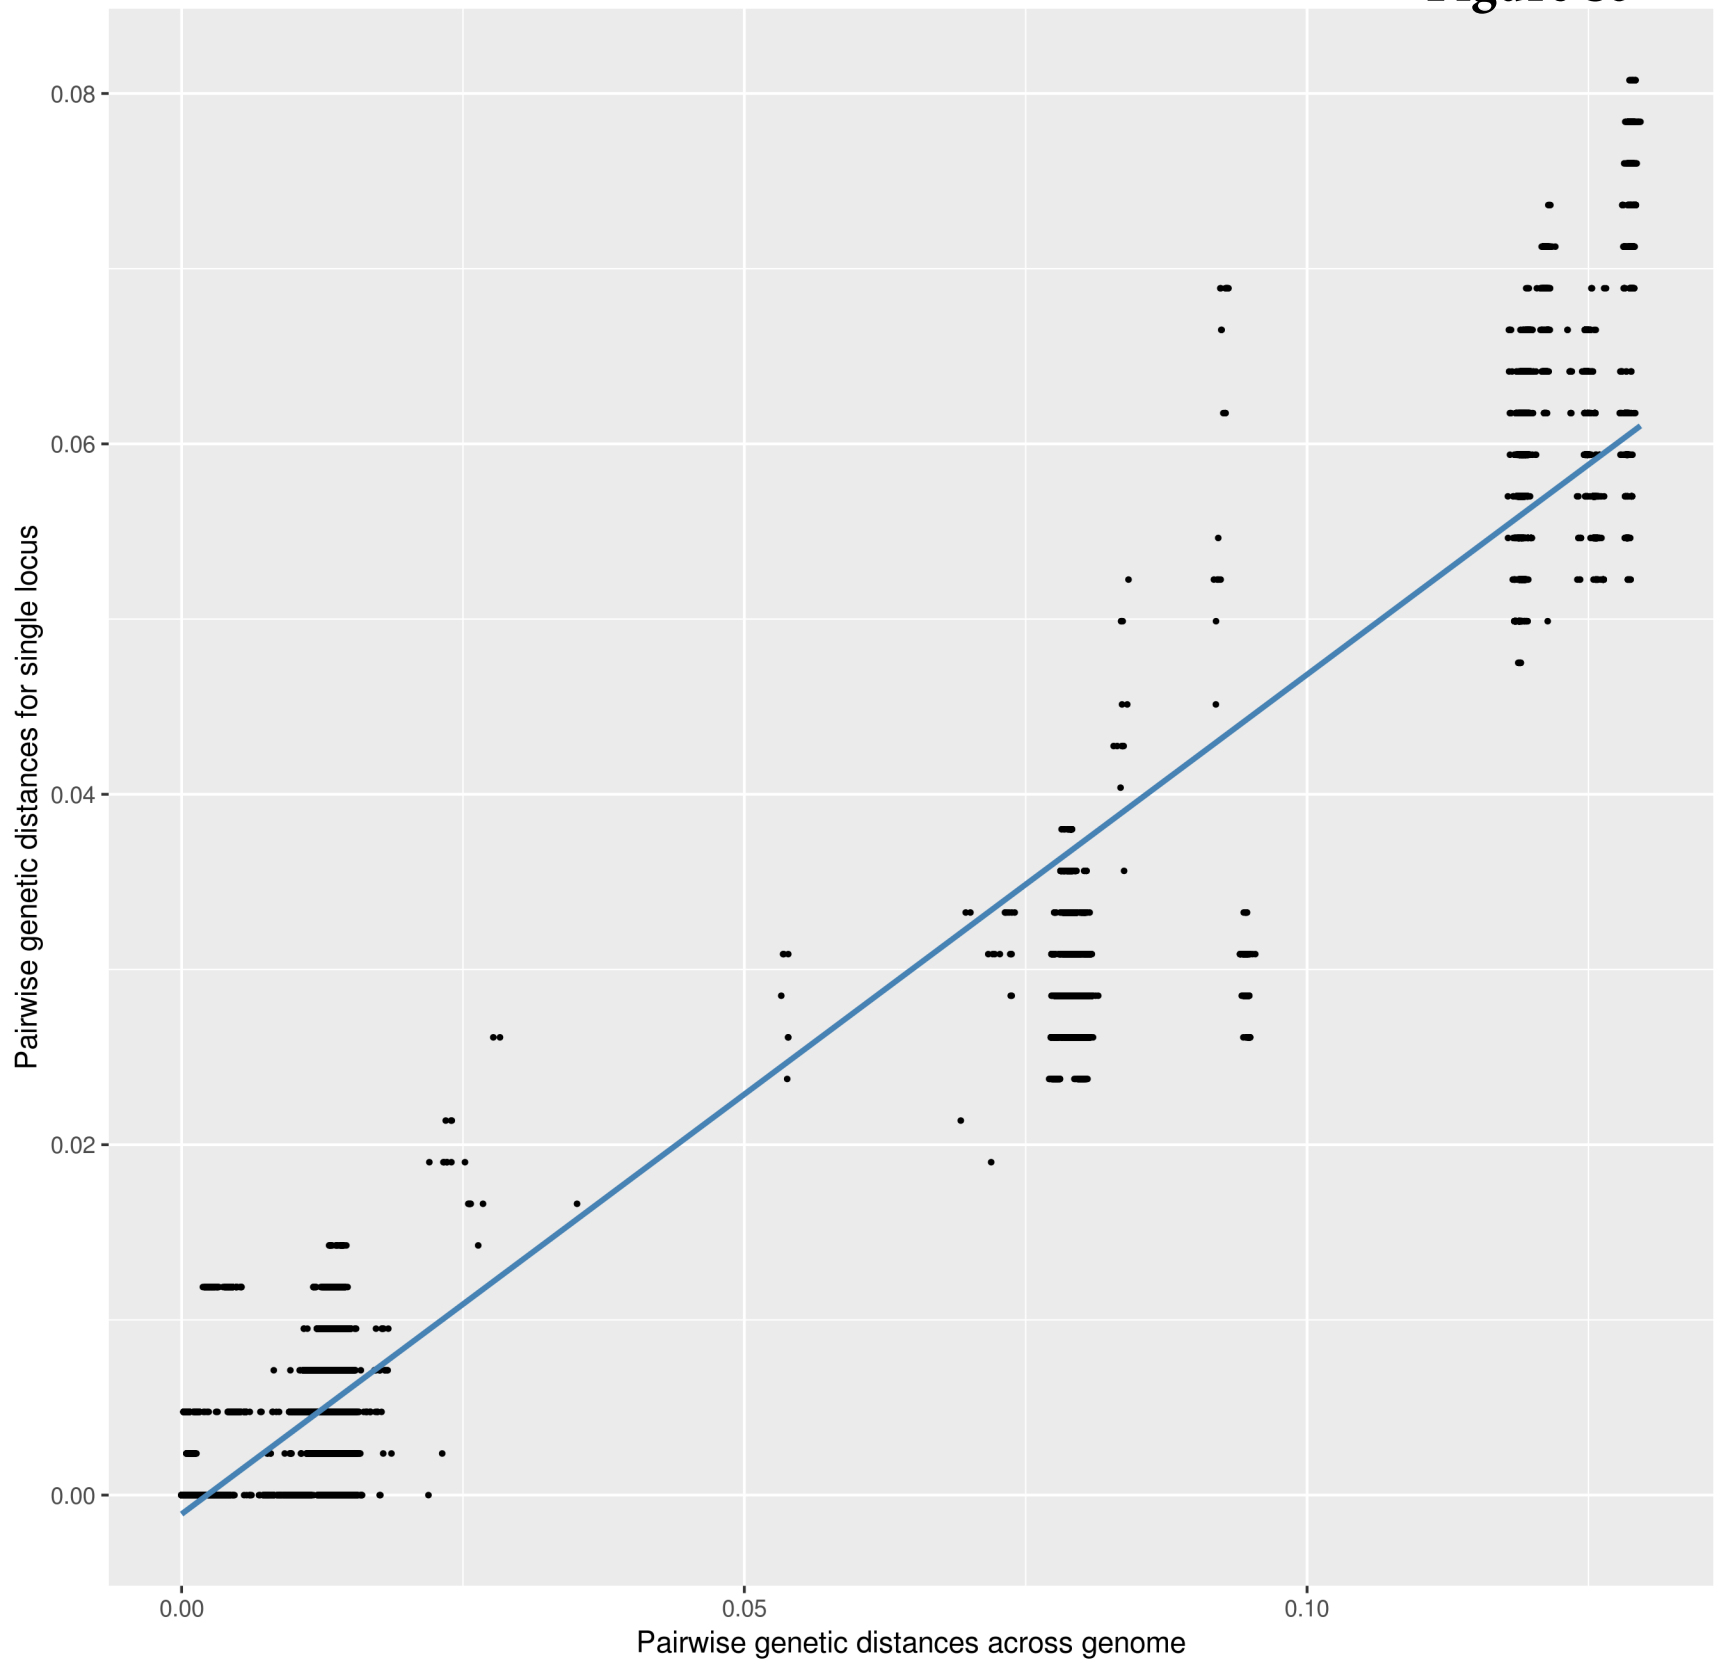

Oxf\_cpn60\_low\_distance  $y = 0.41x - 0.00041$   $R^2=0.532947047301368$

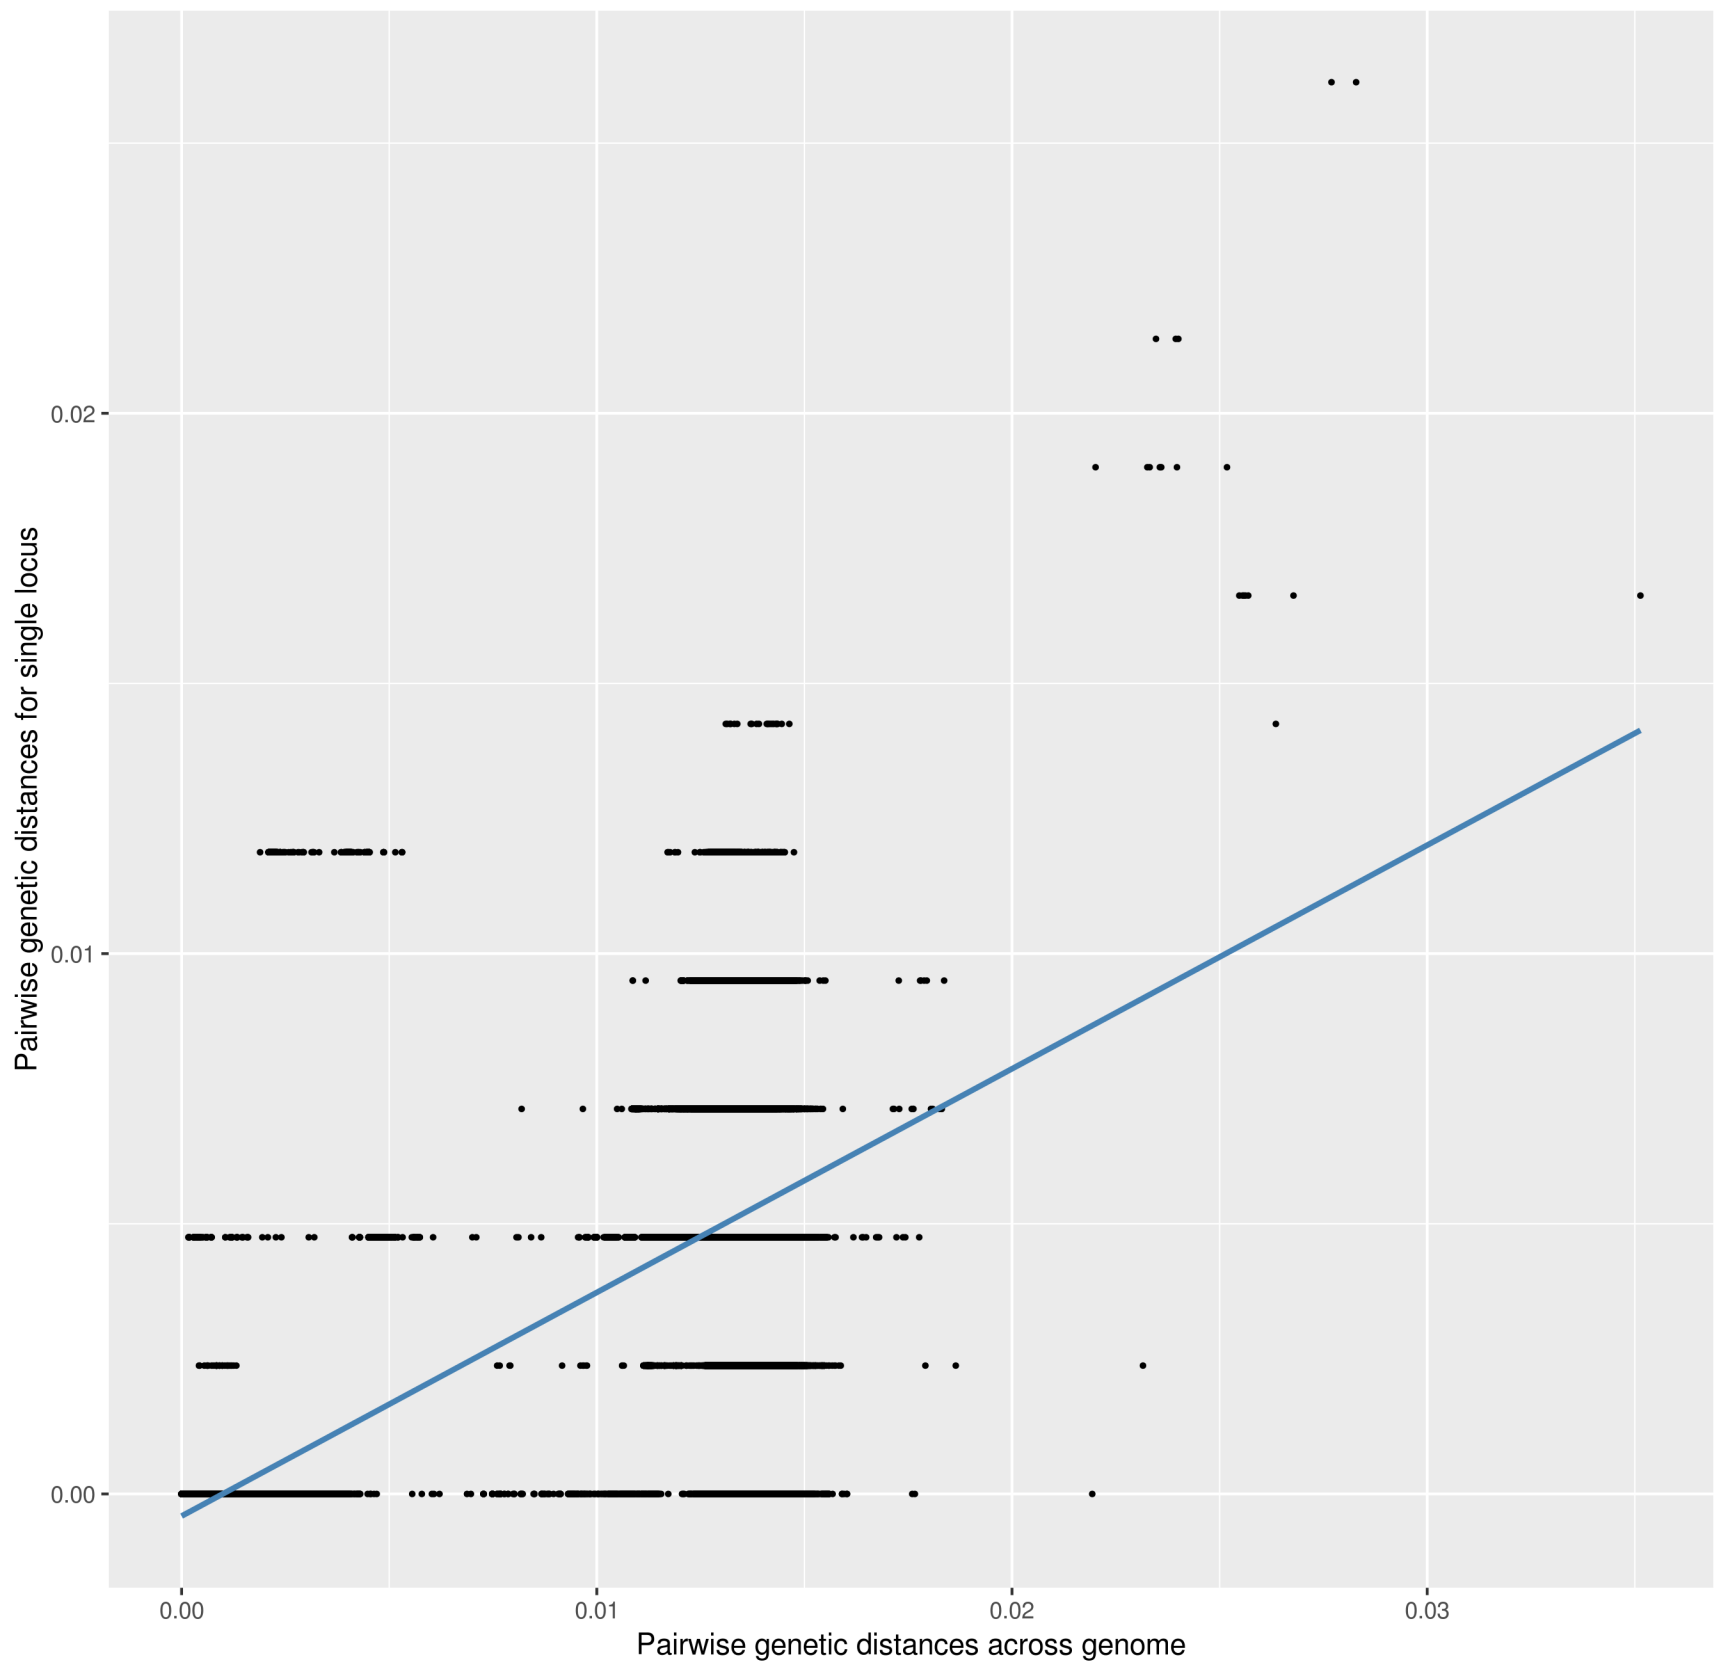



Oxf\_cpn60\_high\_distance  $y = 0.97x - 0.056$   $R^2=0.284655581475051$

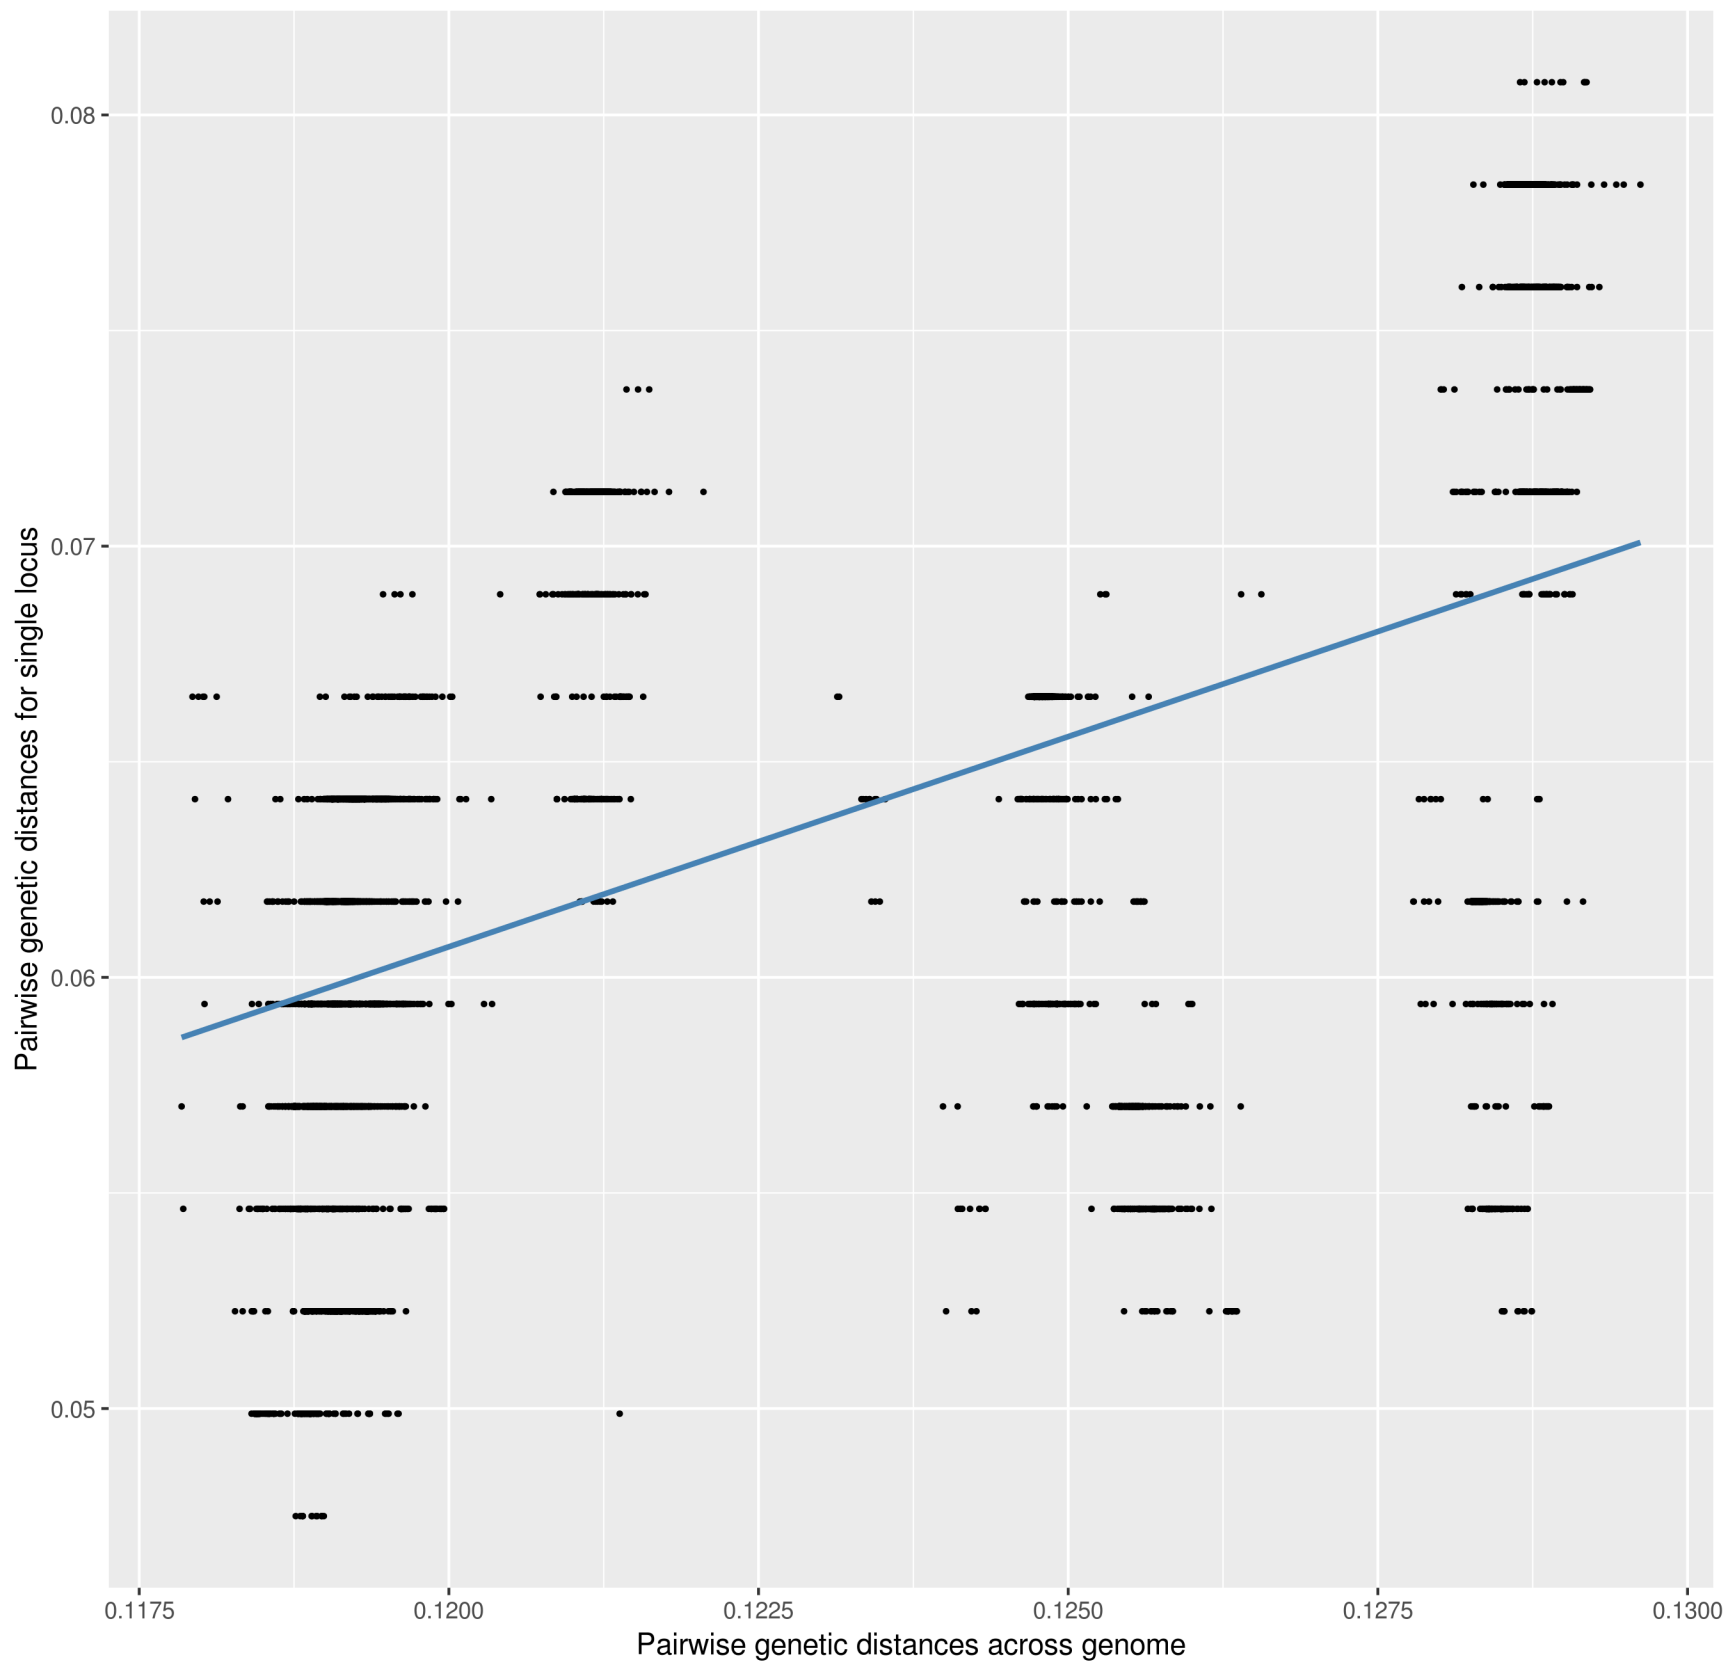

Oxf\_gdhB  $y = 1.2 \times 10^{-5}$   $R^2 = 0.962015863065314$

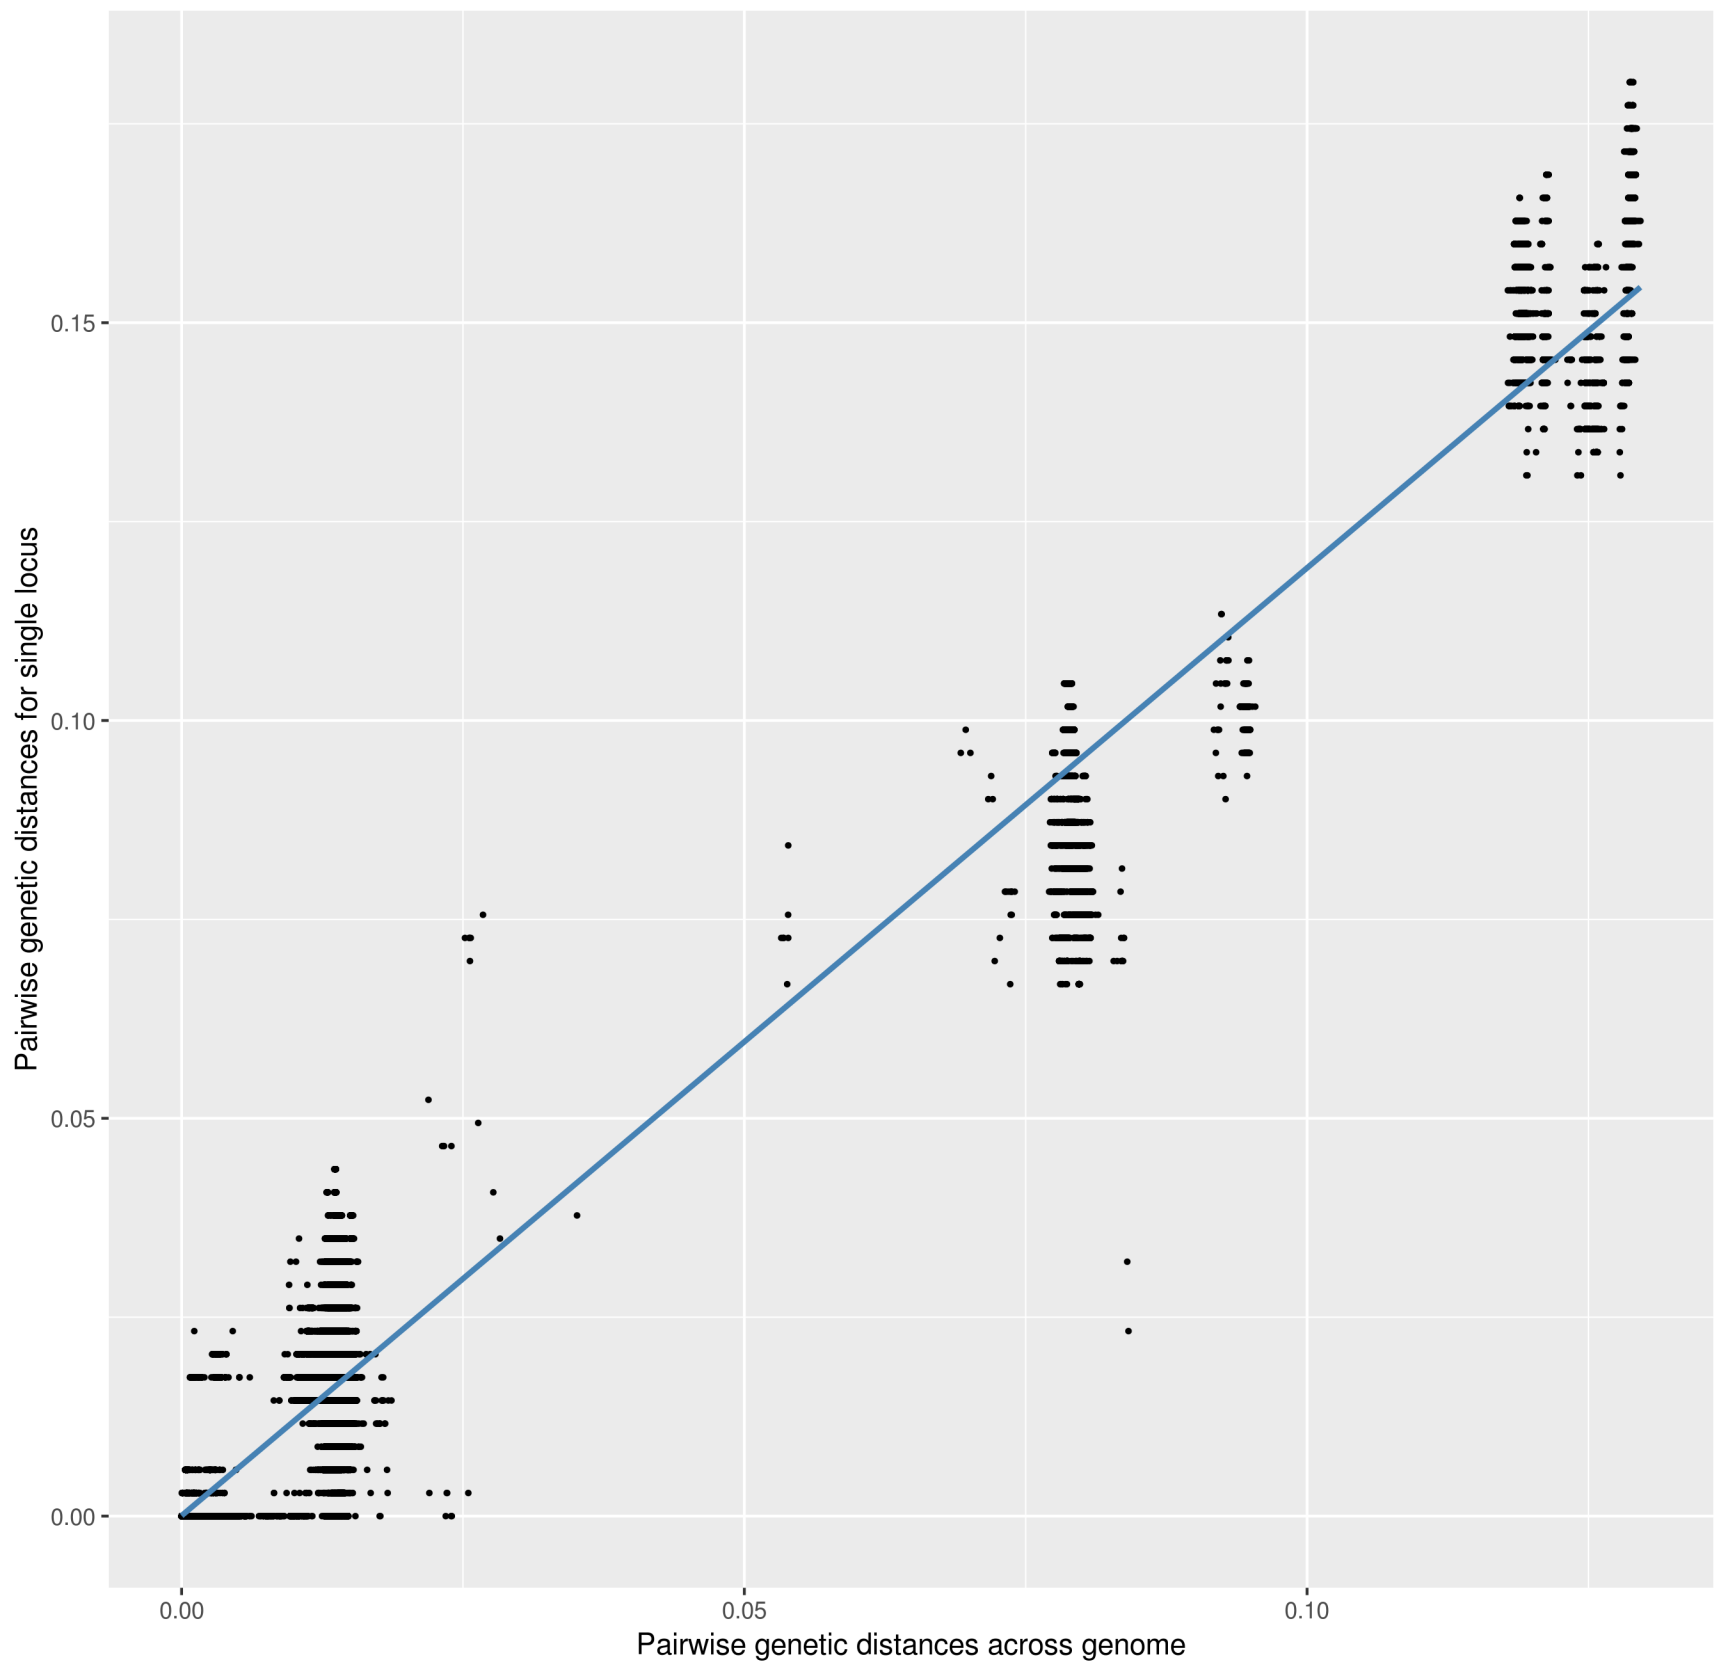

Oxf\_gdhB\_low\_distance  $y = 1.4x - 0.0019$   $R^2=0.729562729349621$

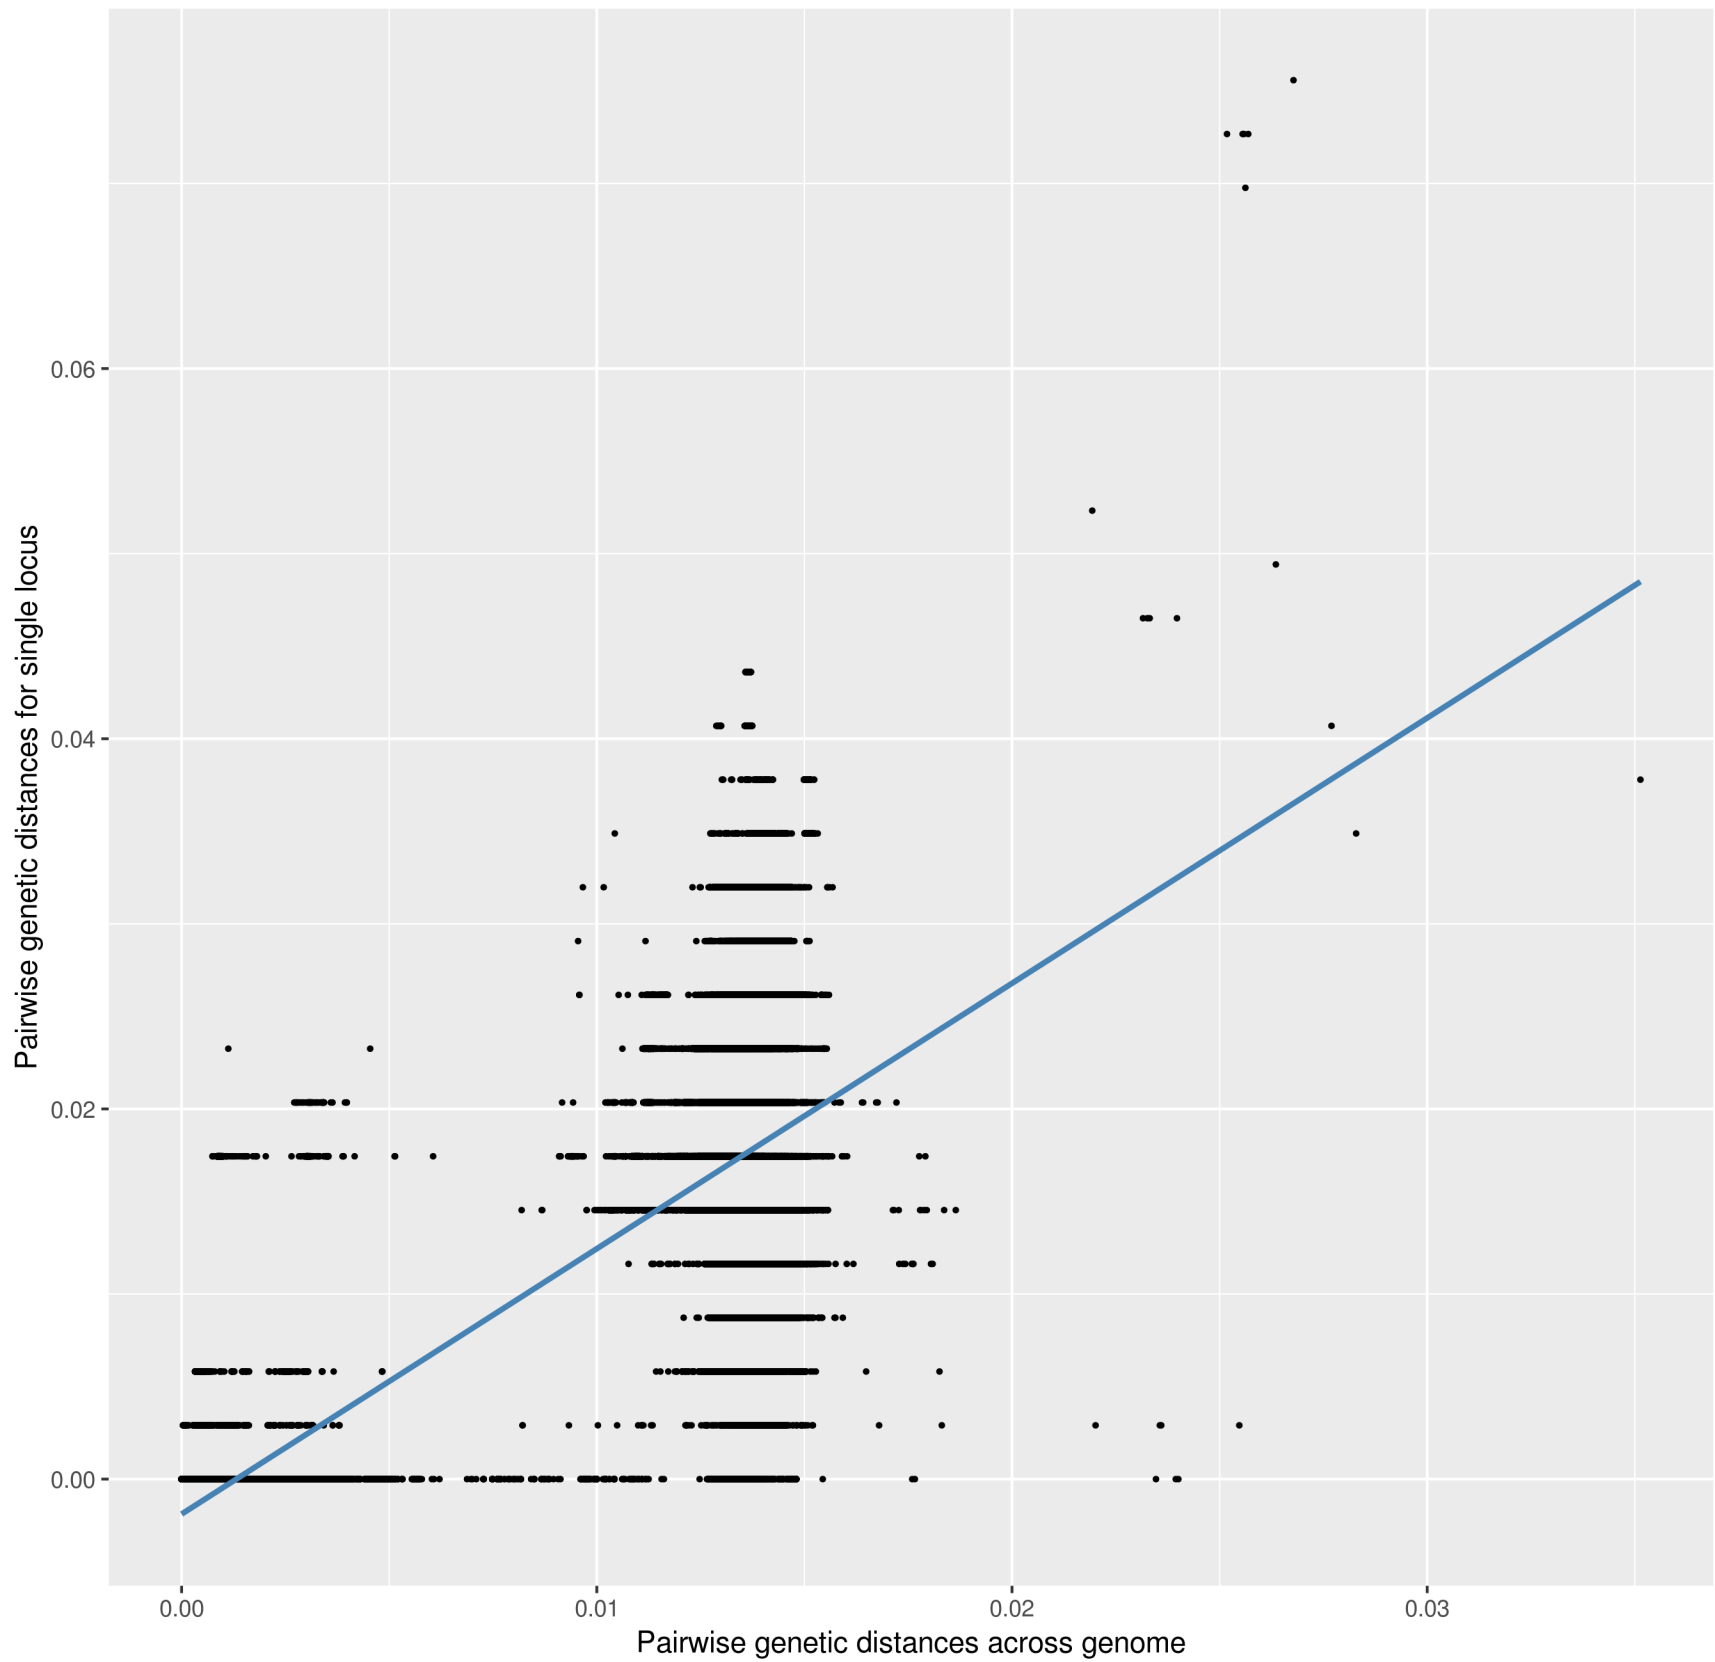



Oxf\_gdhB\_high\_distance  $y = 0.35x + 0.11$   $R^2 = 0.0287888545987795$

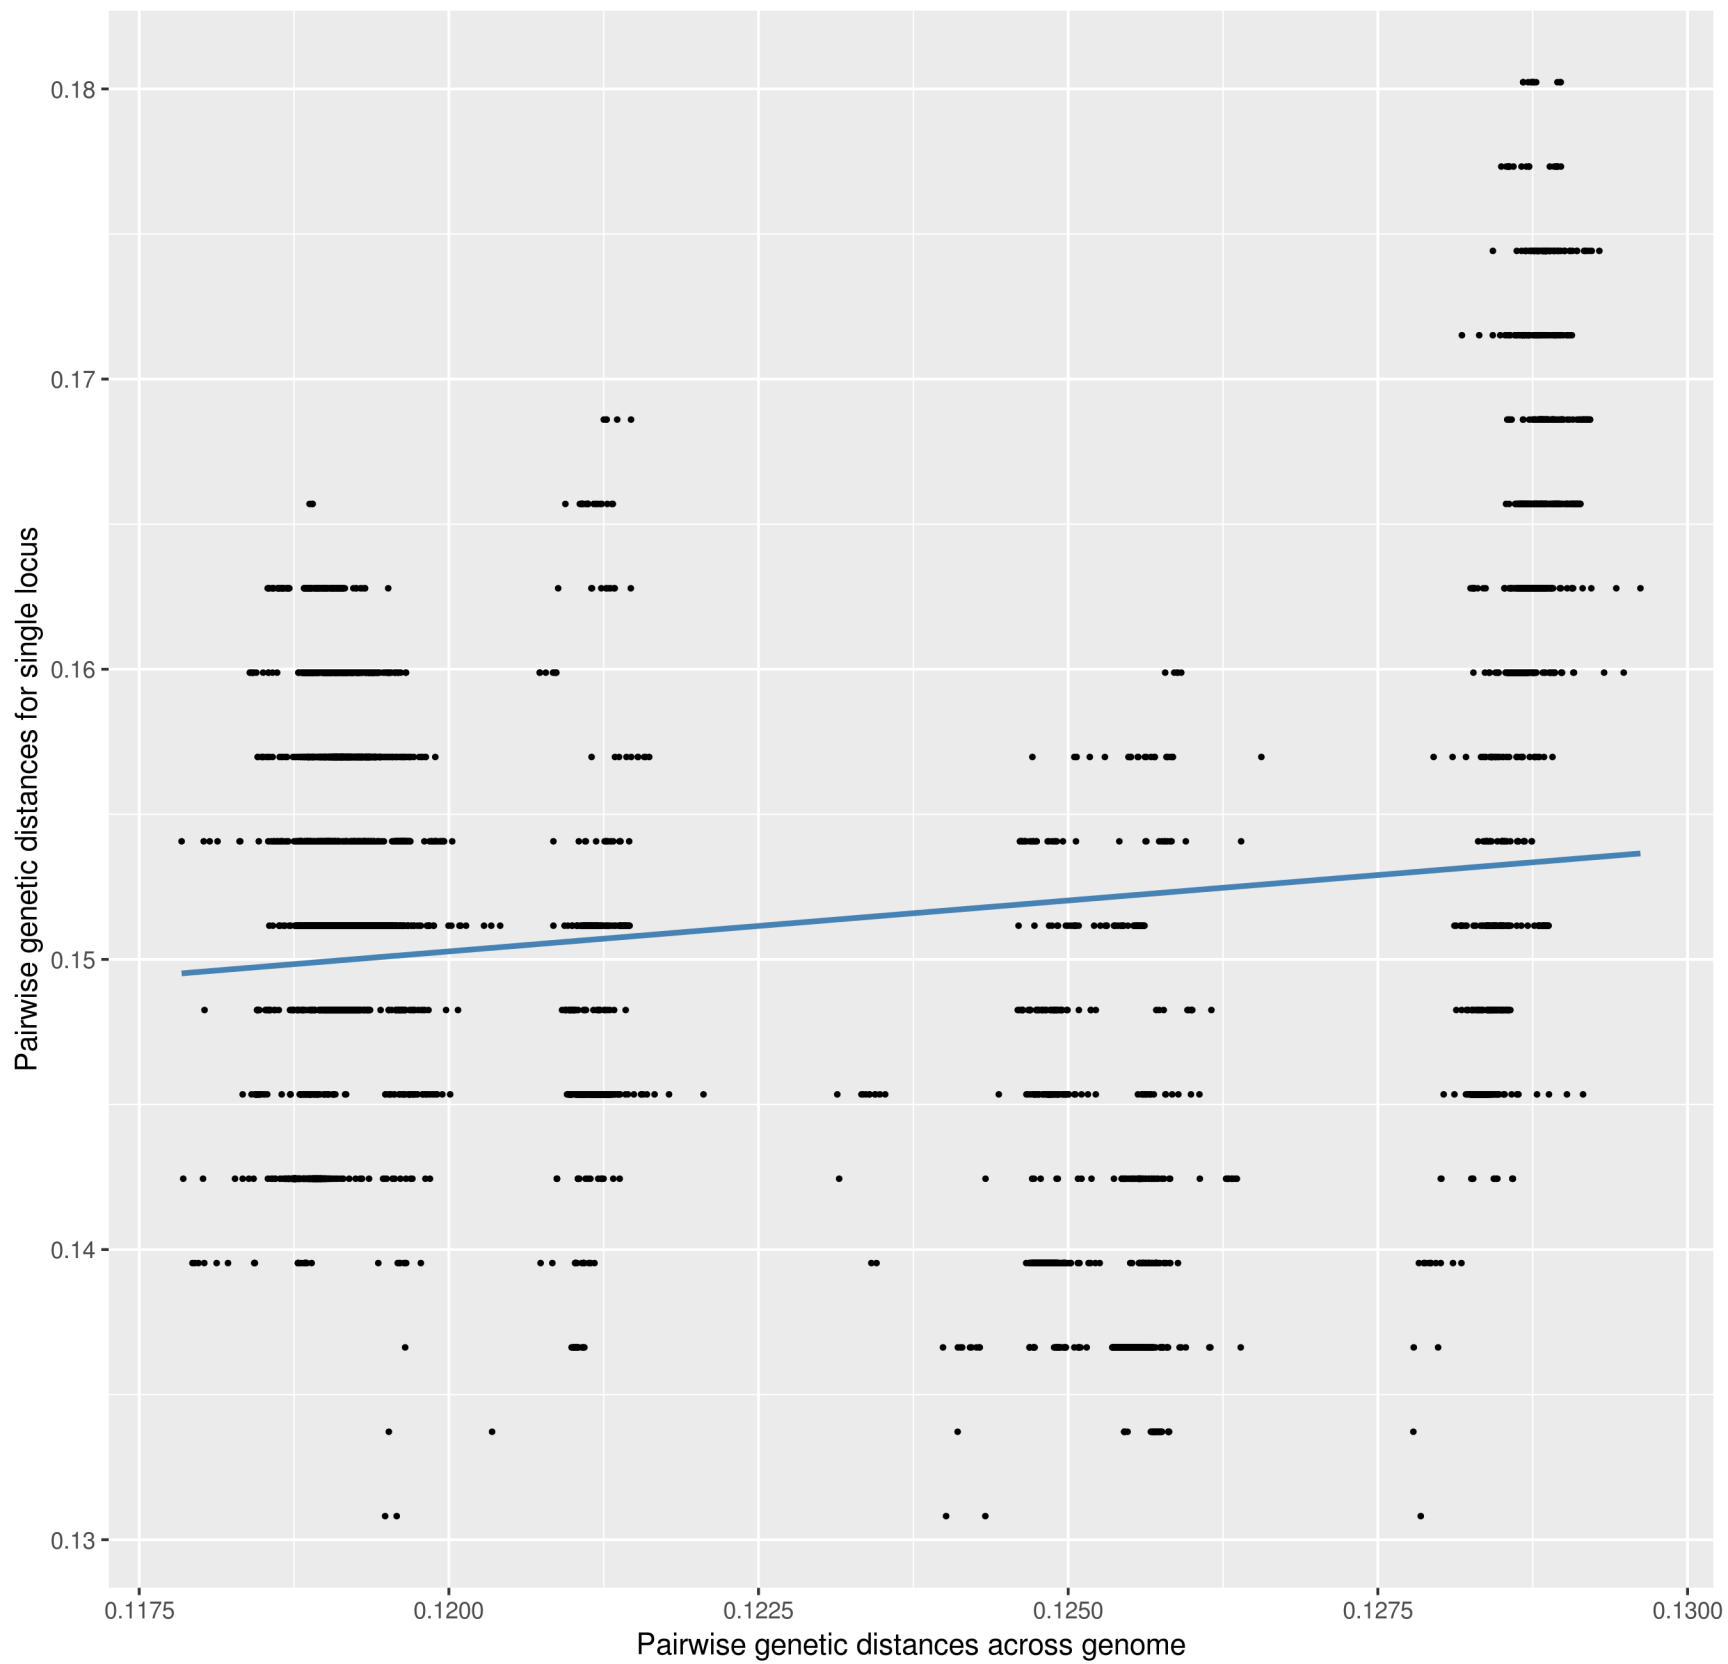



Oxf\_glta  $y = 0.67x - 0.0035$   $R^2=0.969935350825587$

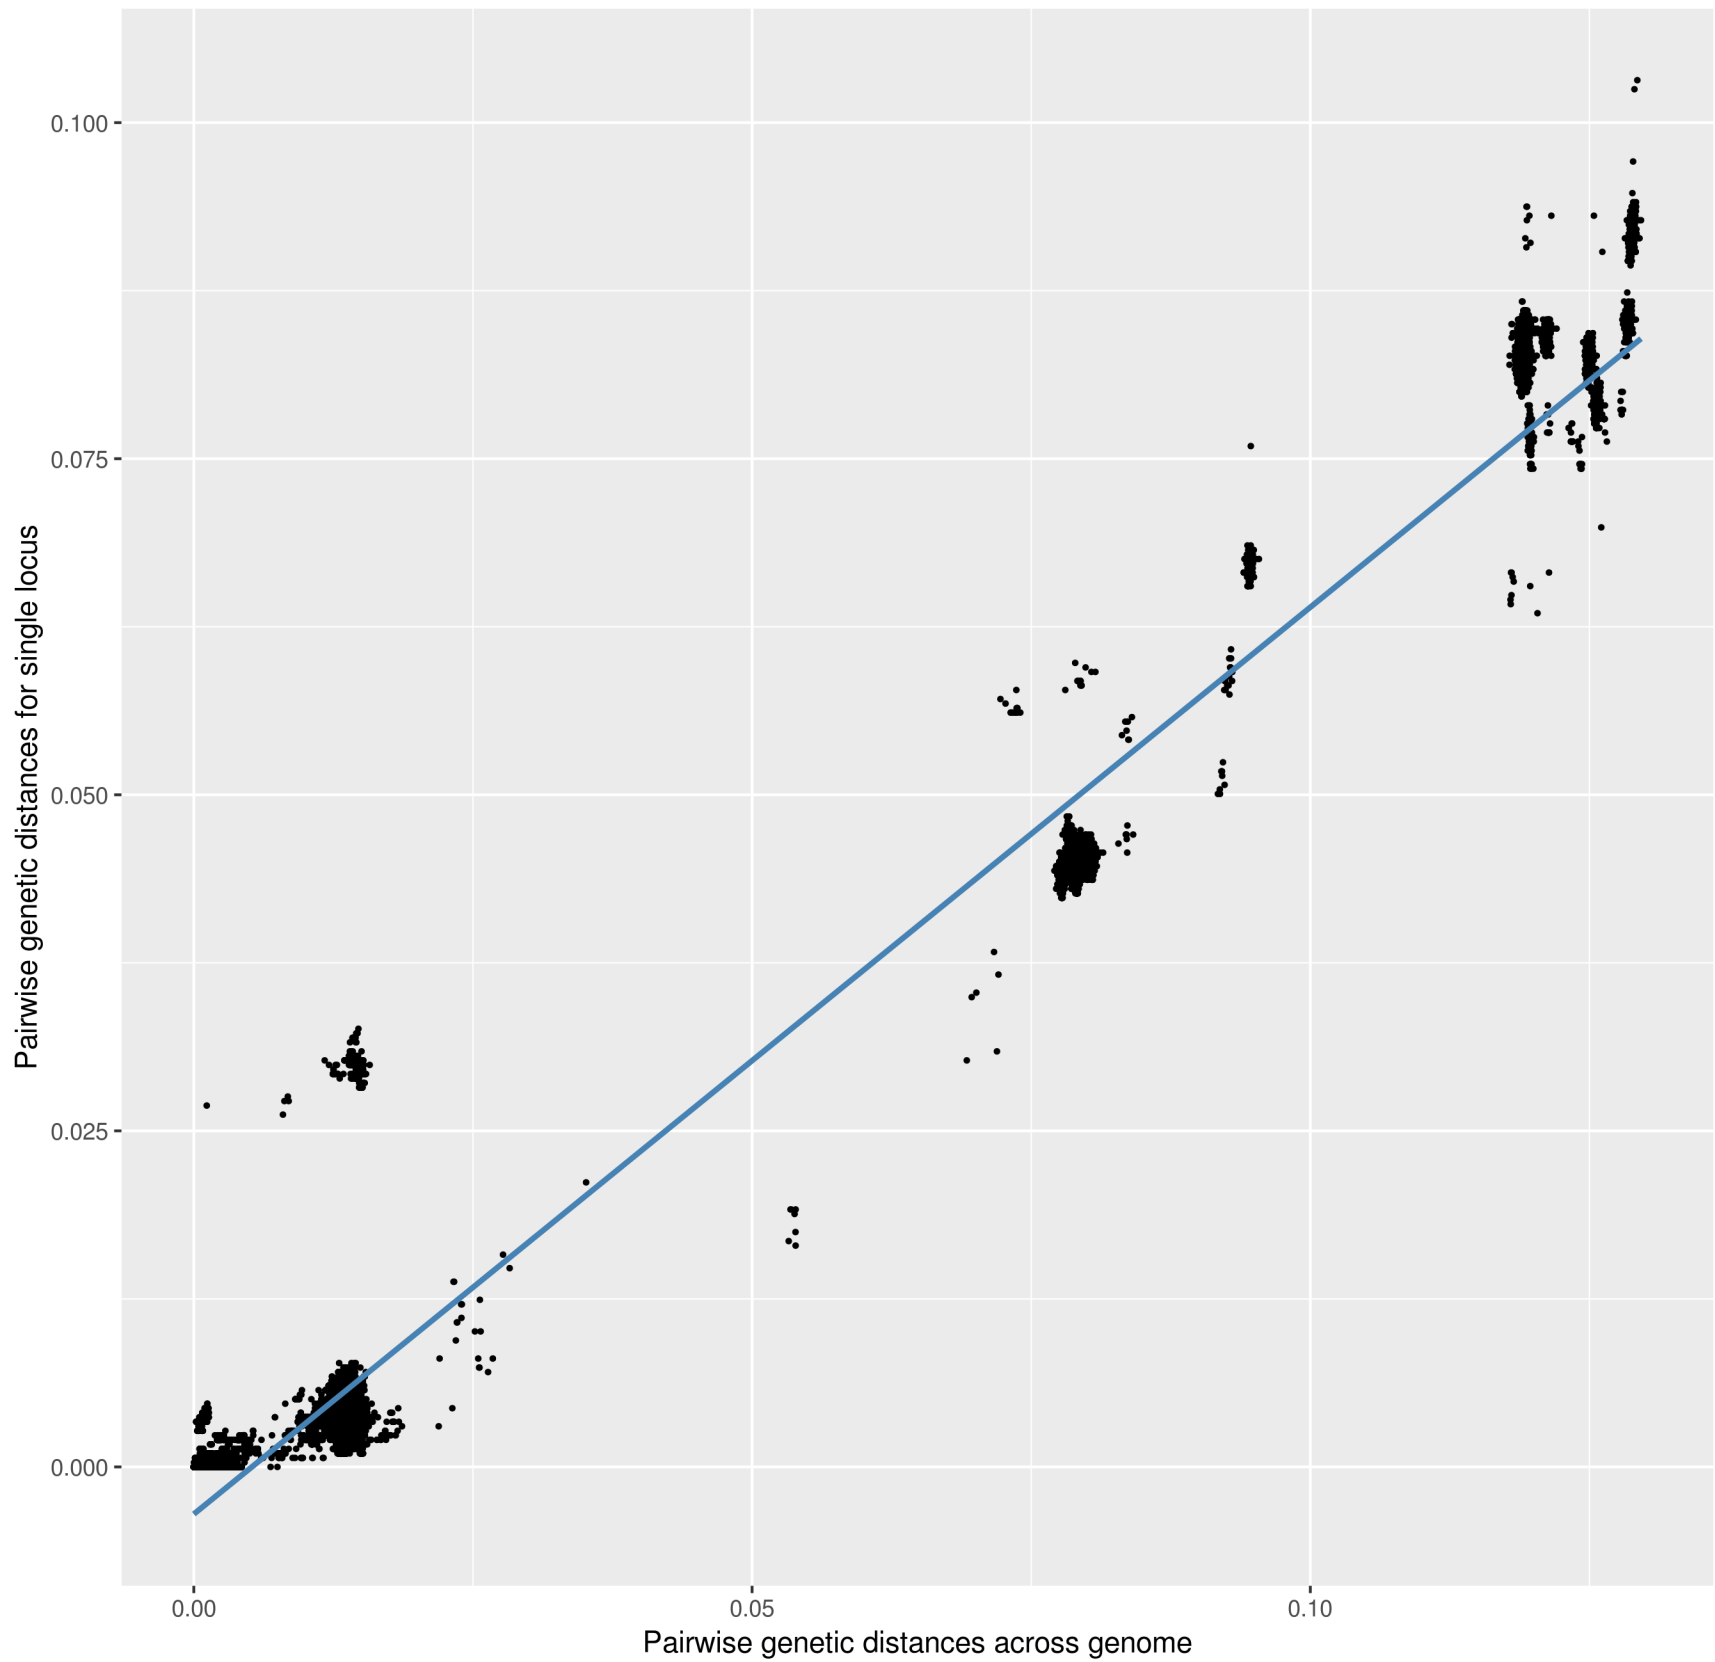

Oxf\_glta\_low\_distance  $y = 0.32x - 0.00038$   $R^2=0.554214830034458$

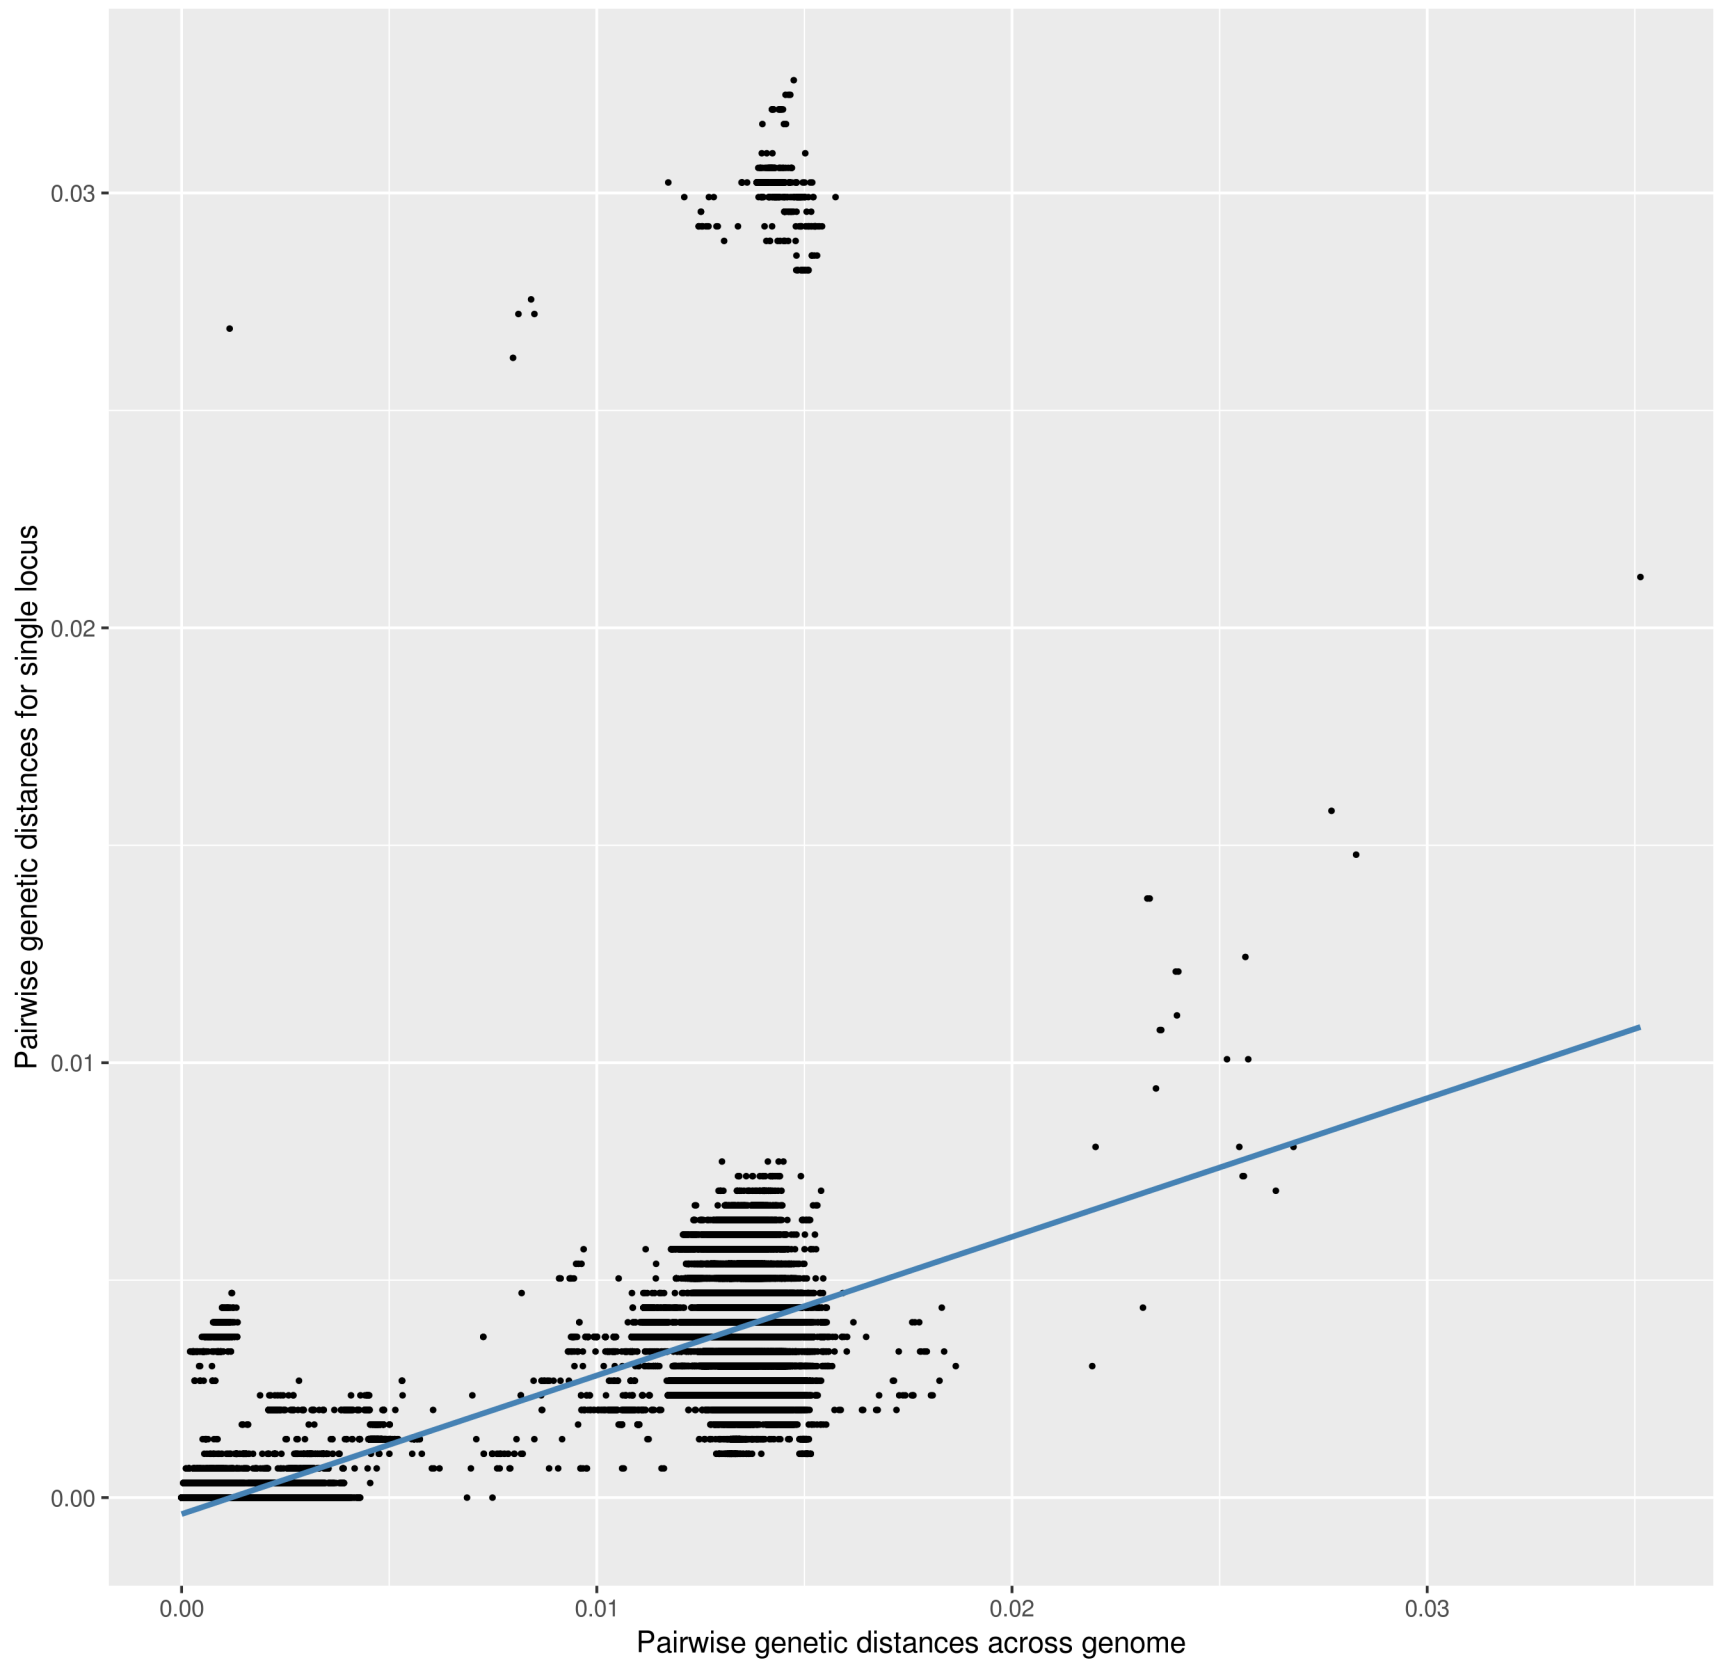

Oxf\_glta\_mid\_distance  $y = 1.4x - 0.064$   $R^2=0.937774173689432$

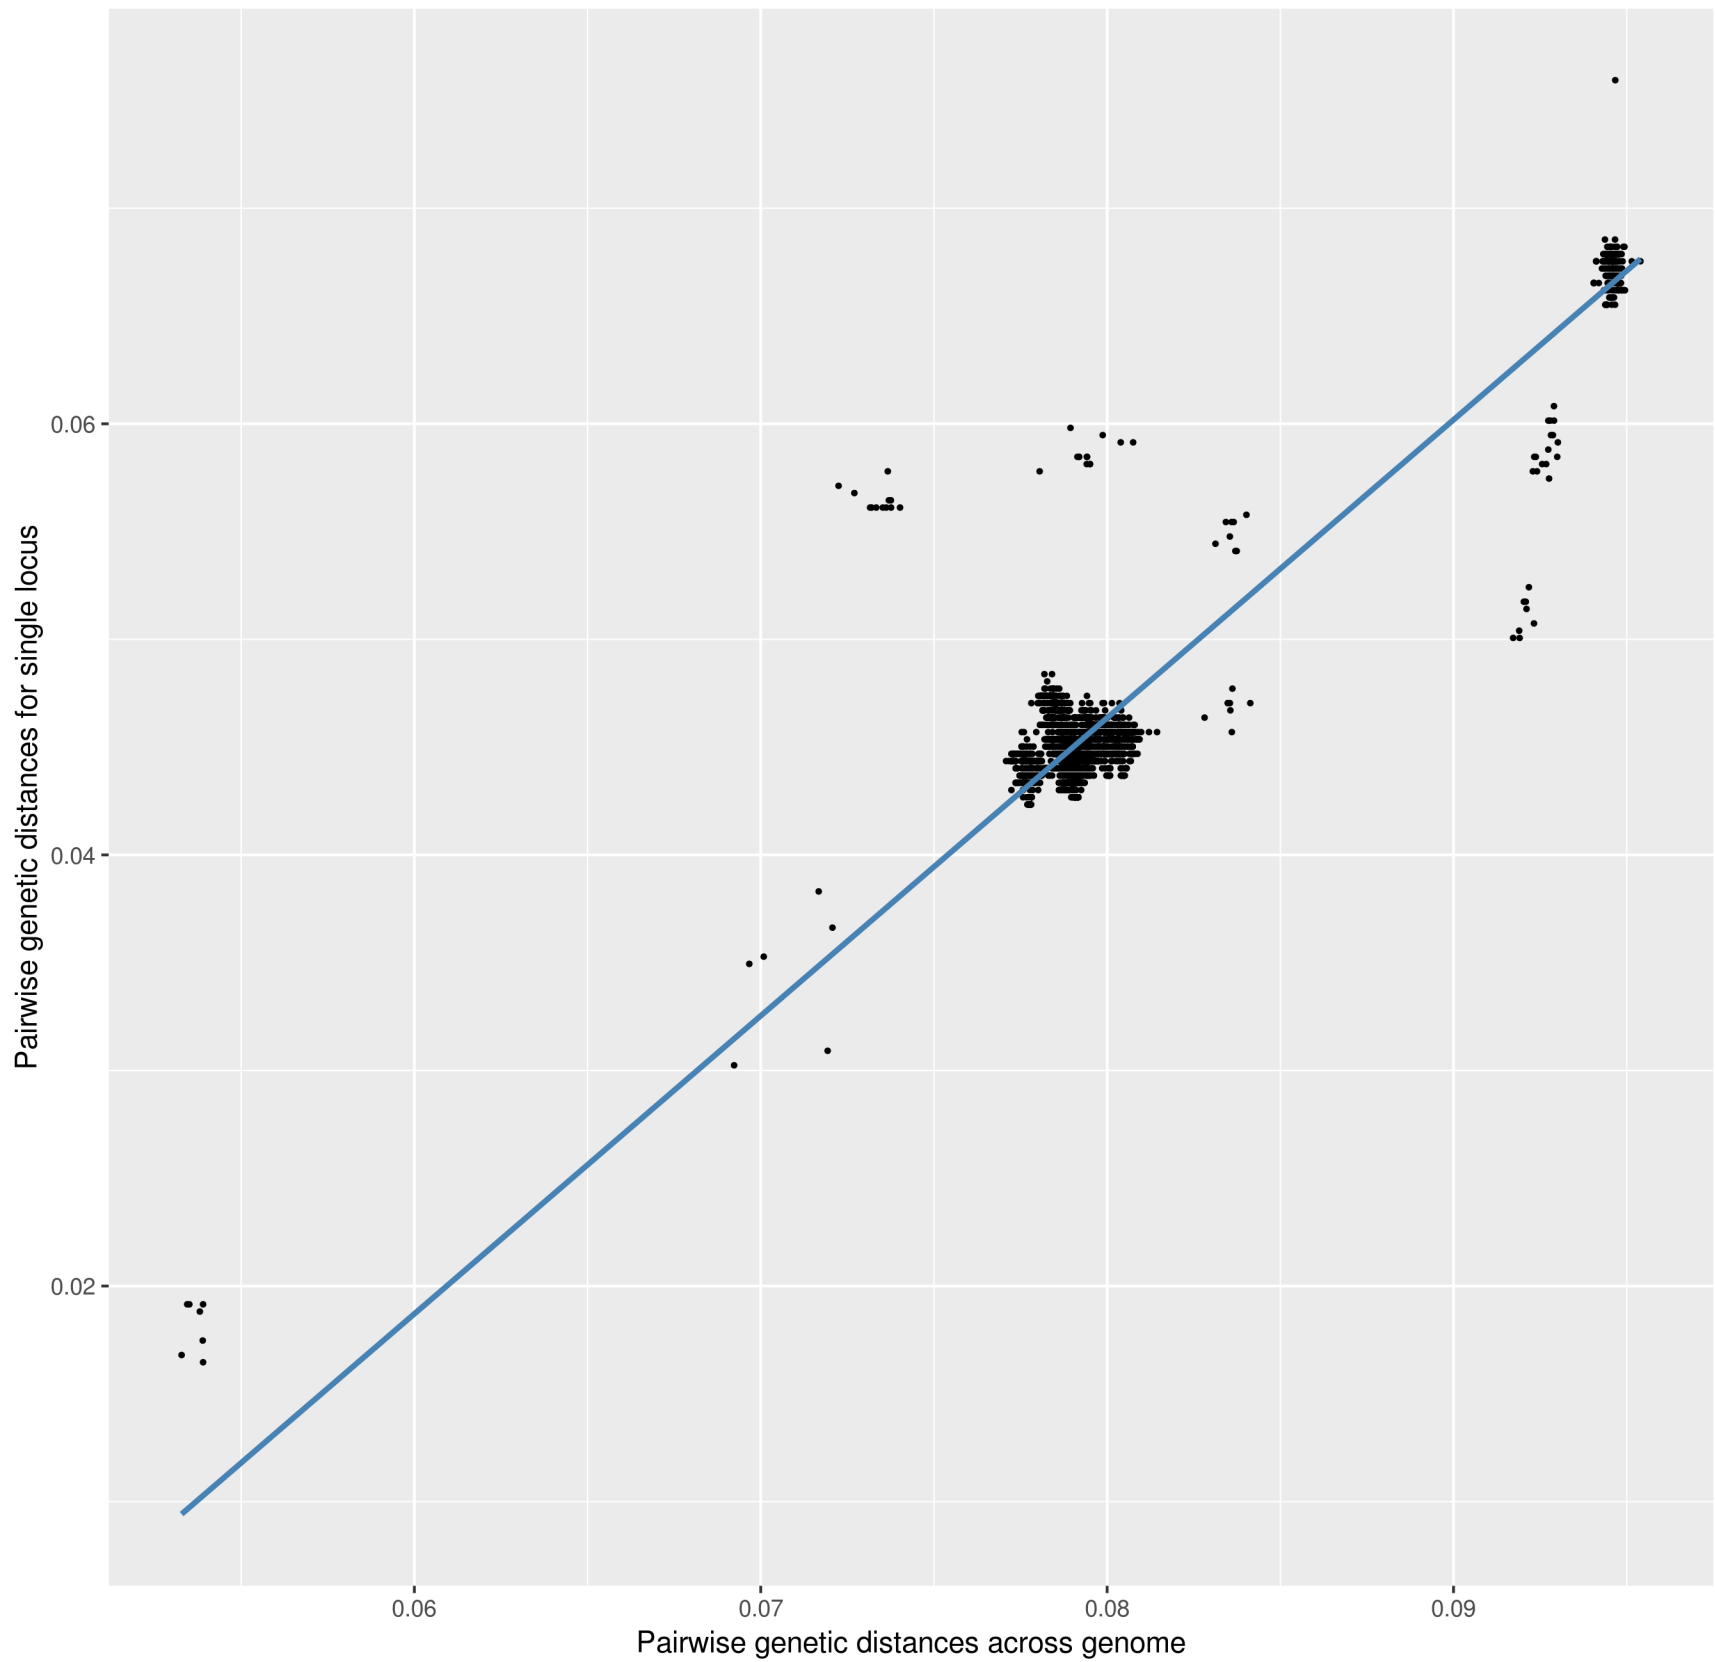

Oxf\_glta\_high\_distance  $y = 0.47x + 0.027$   $R^2=0.251962942074139$

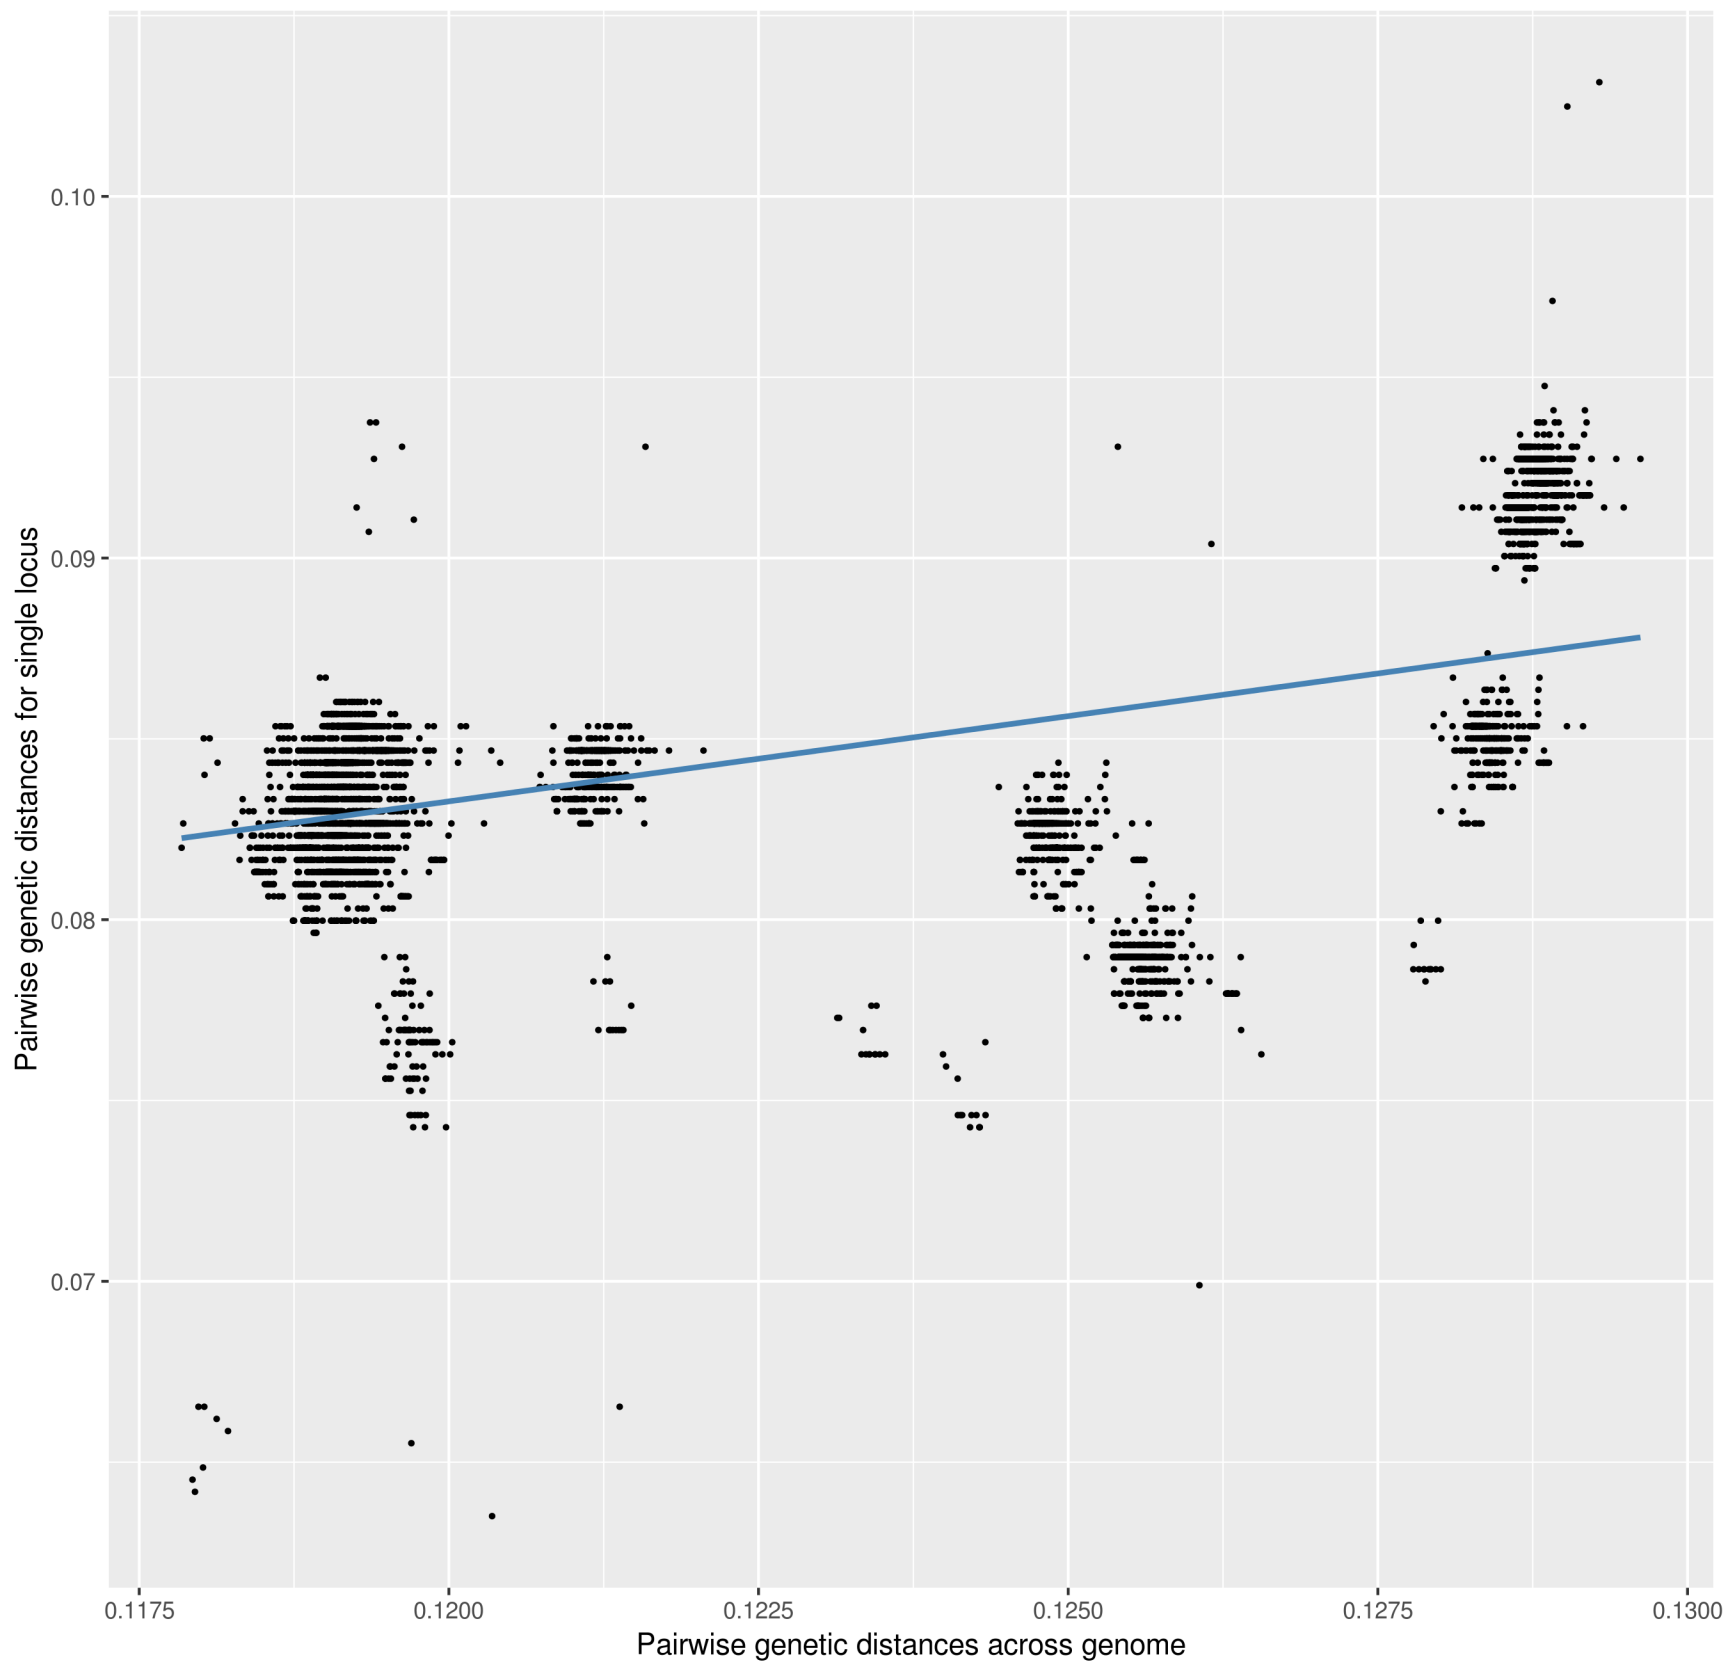

Oxf\_gpi  $y = 1.4x - 0.031$   $R^2 = 0.533900609304808$

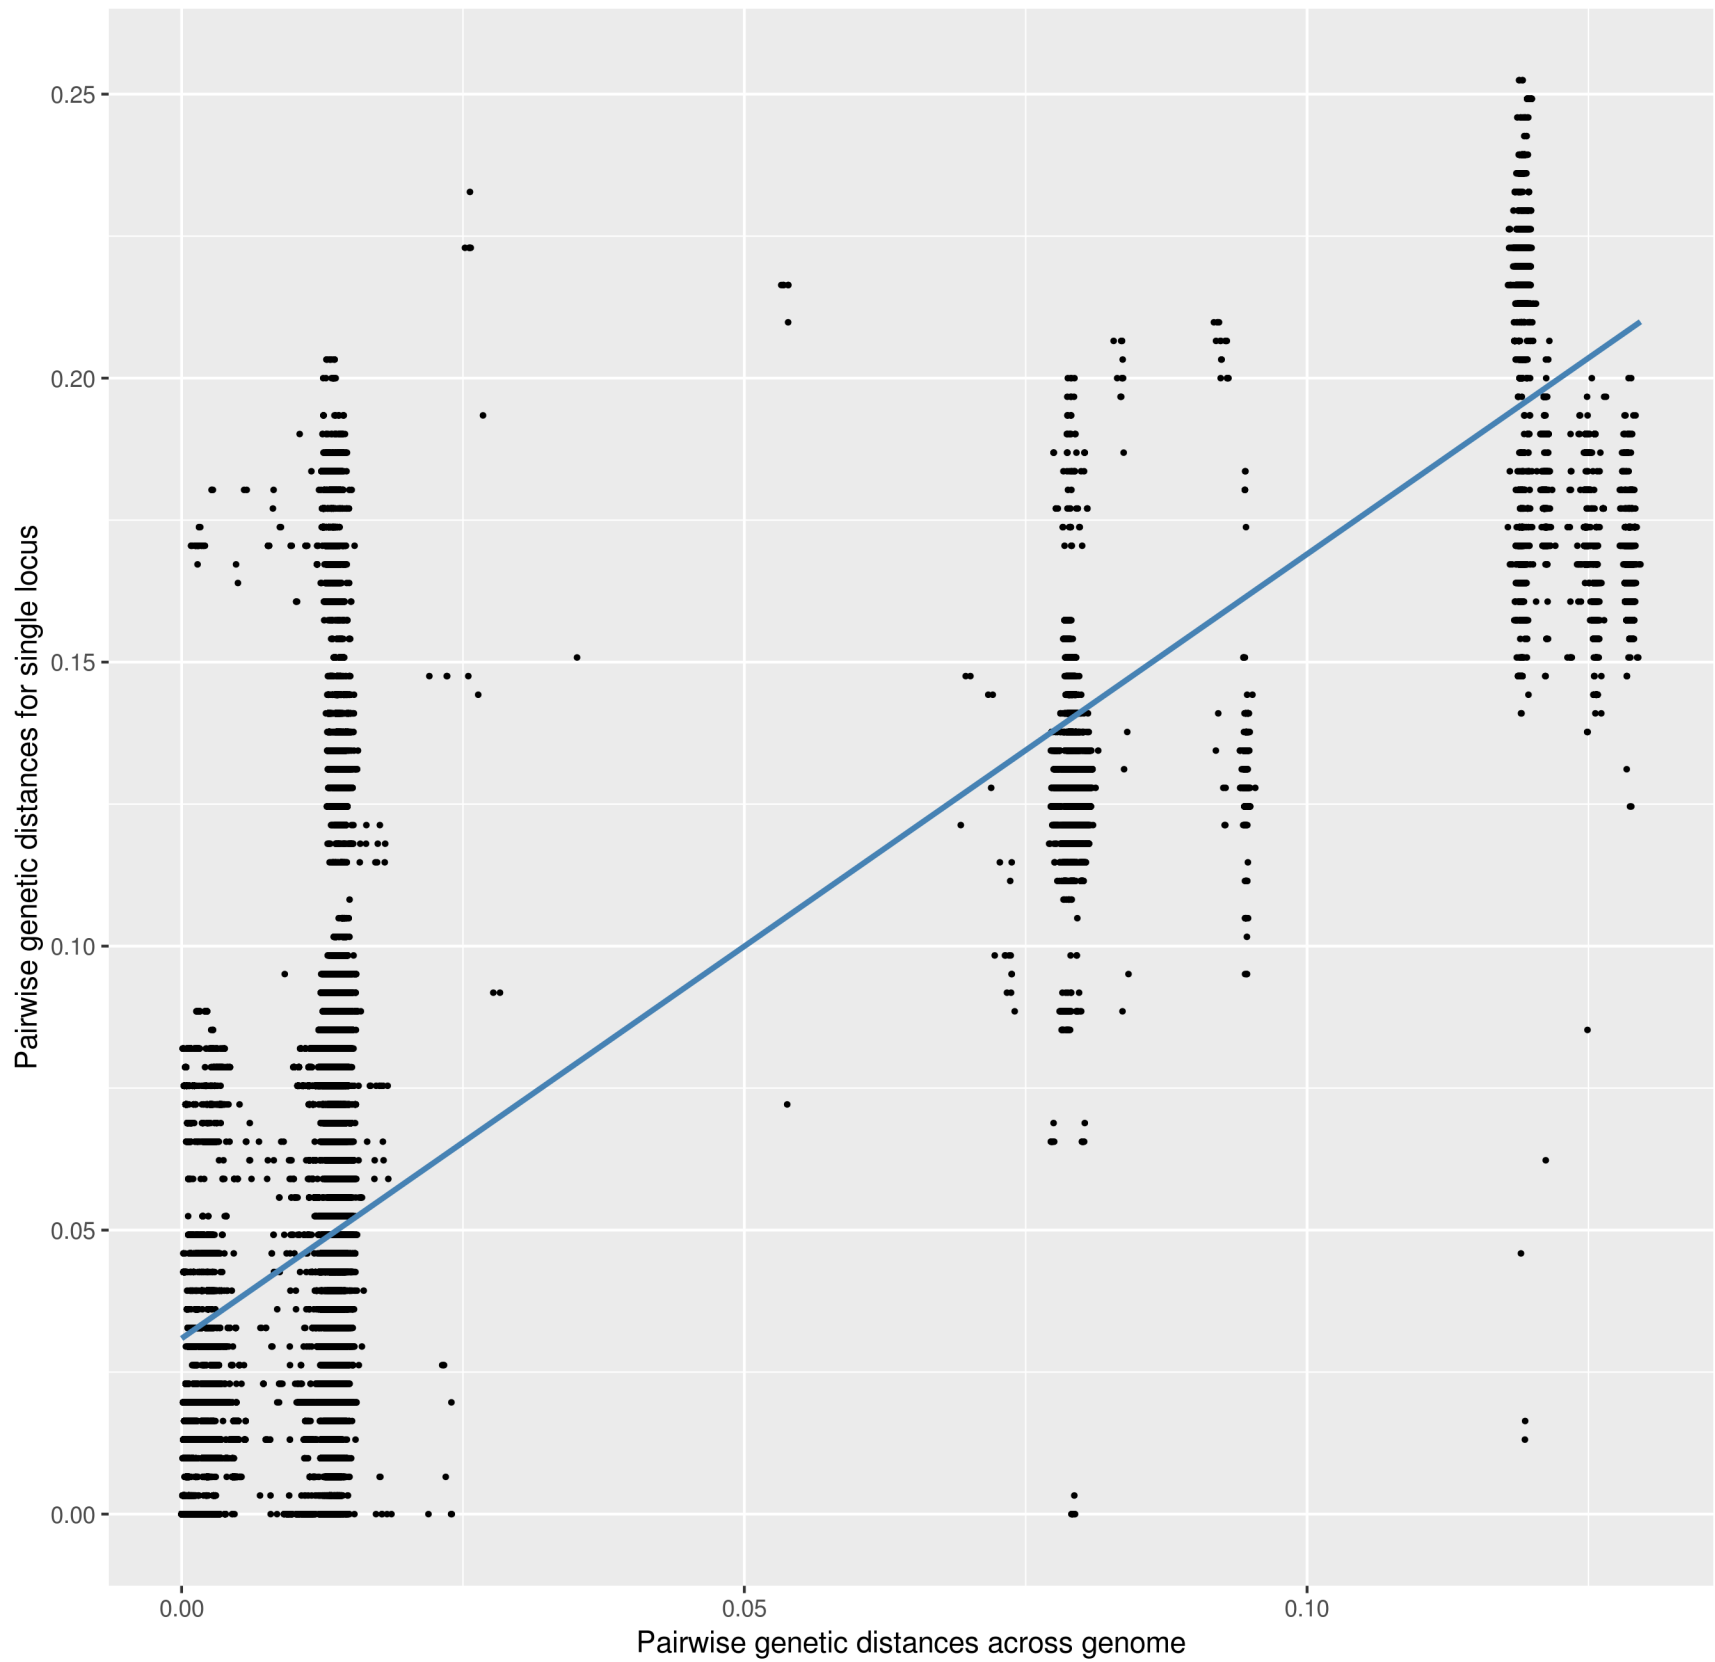

Oxf\_gpi\_low\_distance y = 4x 0.0082 R2=0.395538868392971

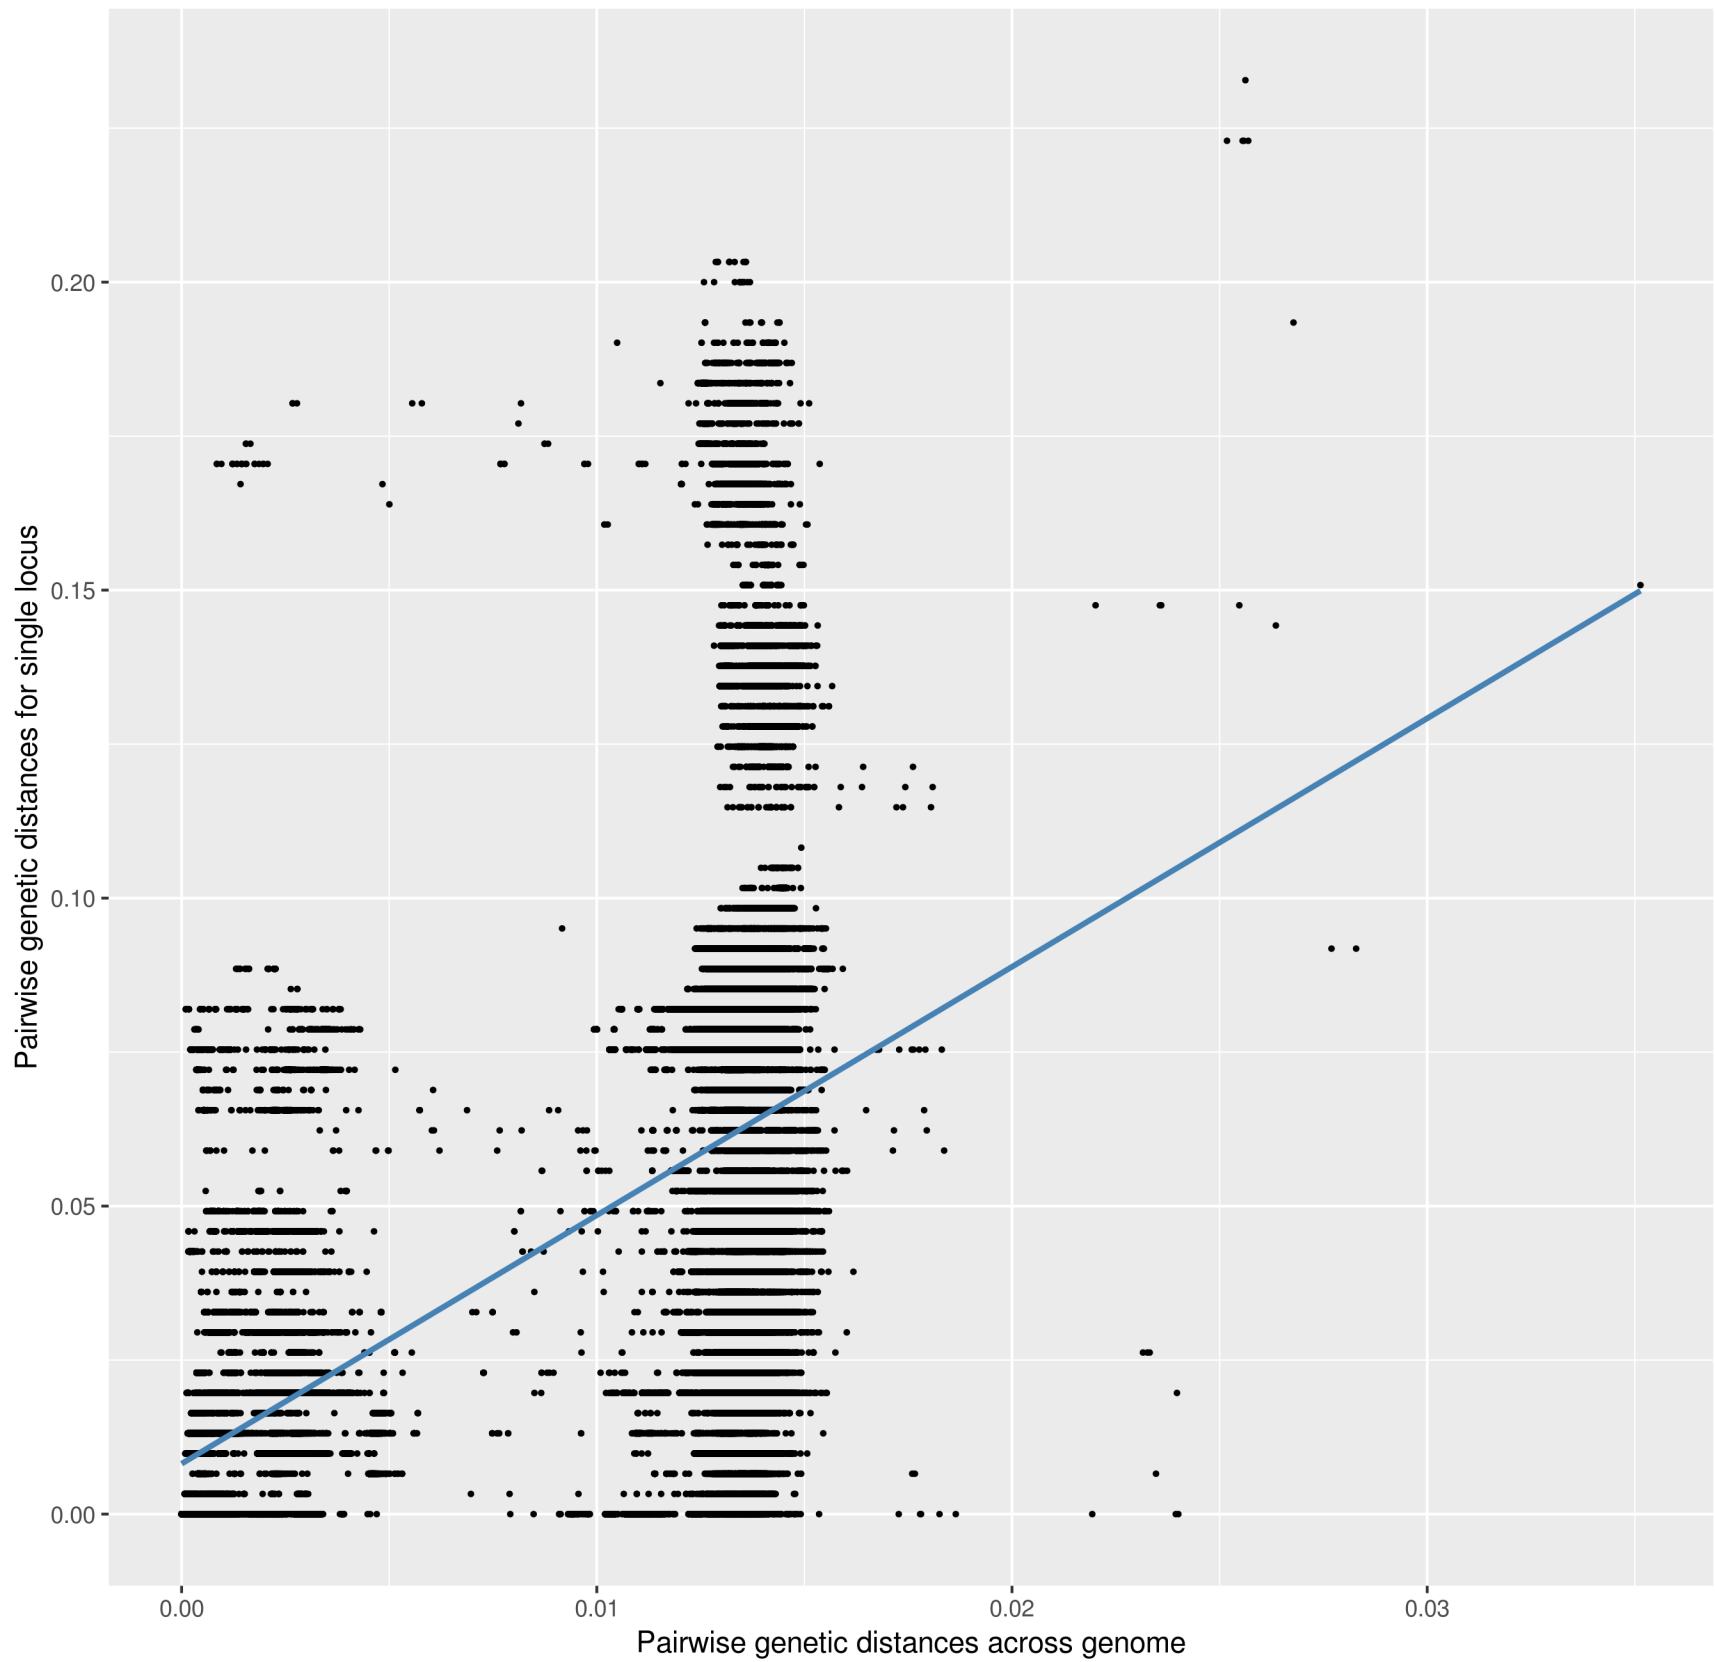

Oxf\_gpi\_mid\_distance  $y = 0.037x + 0.13$   $R^2 = 0.000126605963990813$

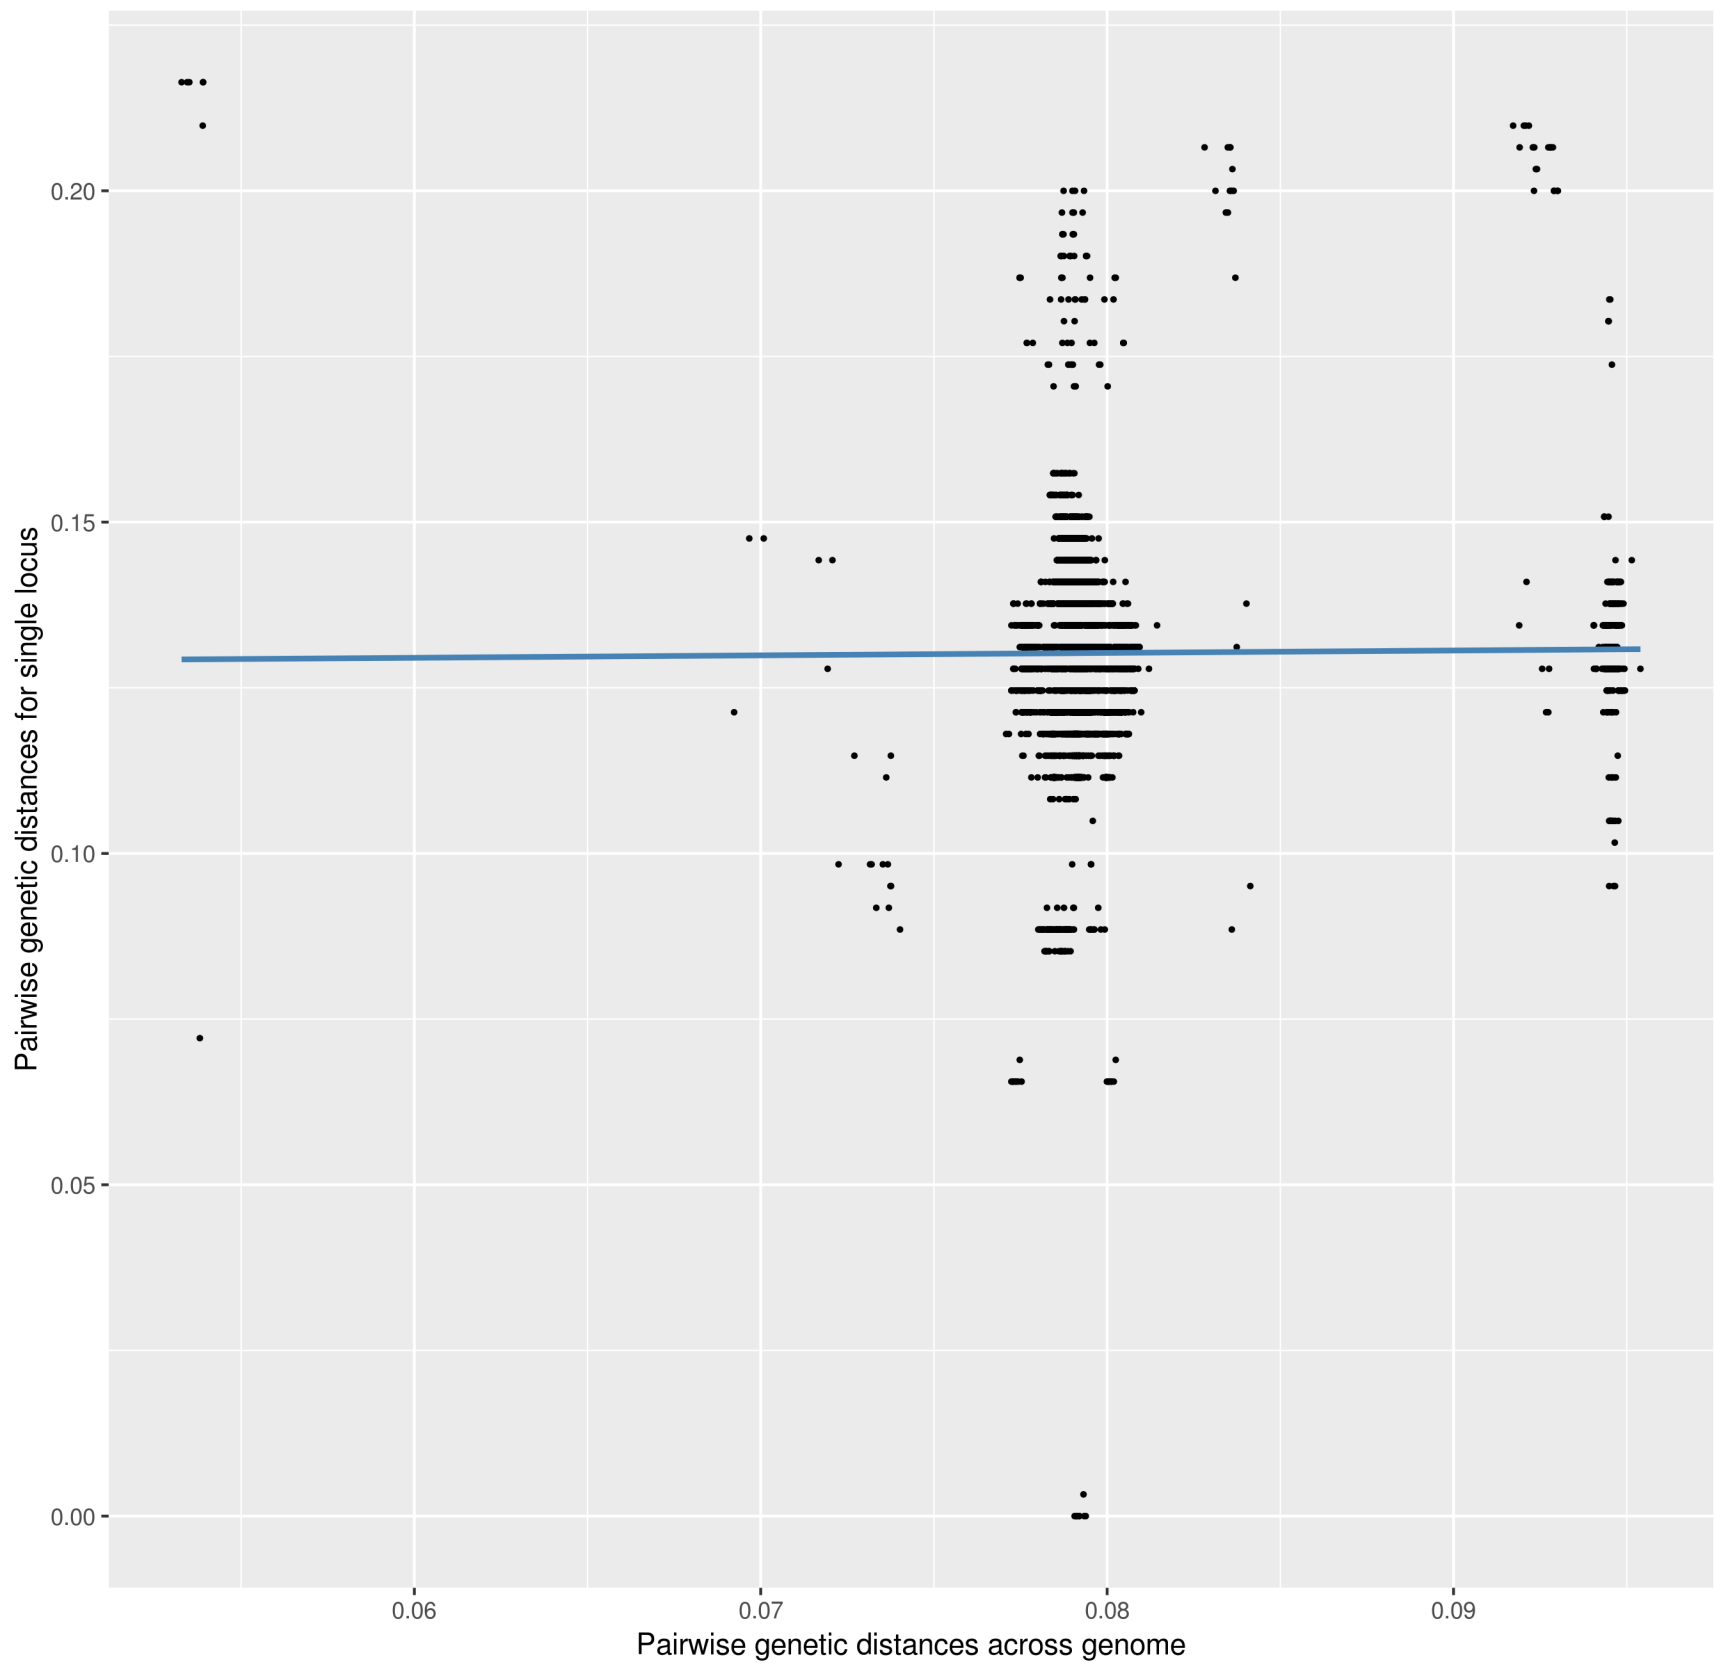

Oxf\_gpi\_high\_distance  $y = -4.2x + 0.7$   $R^2=0.383851446233333$

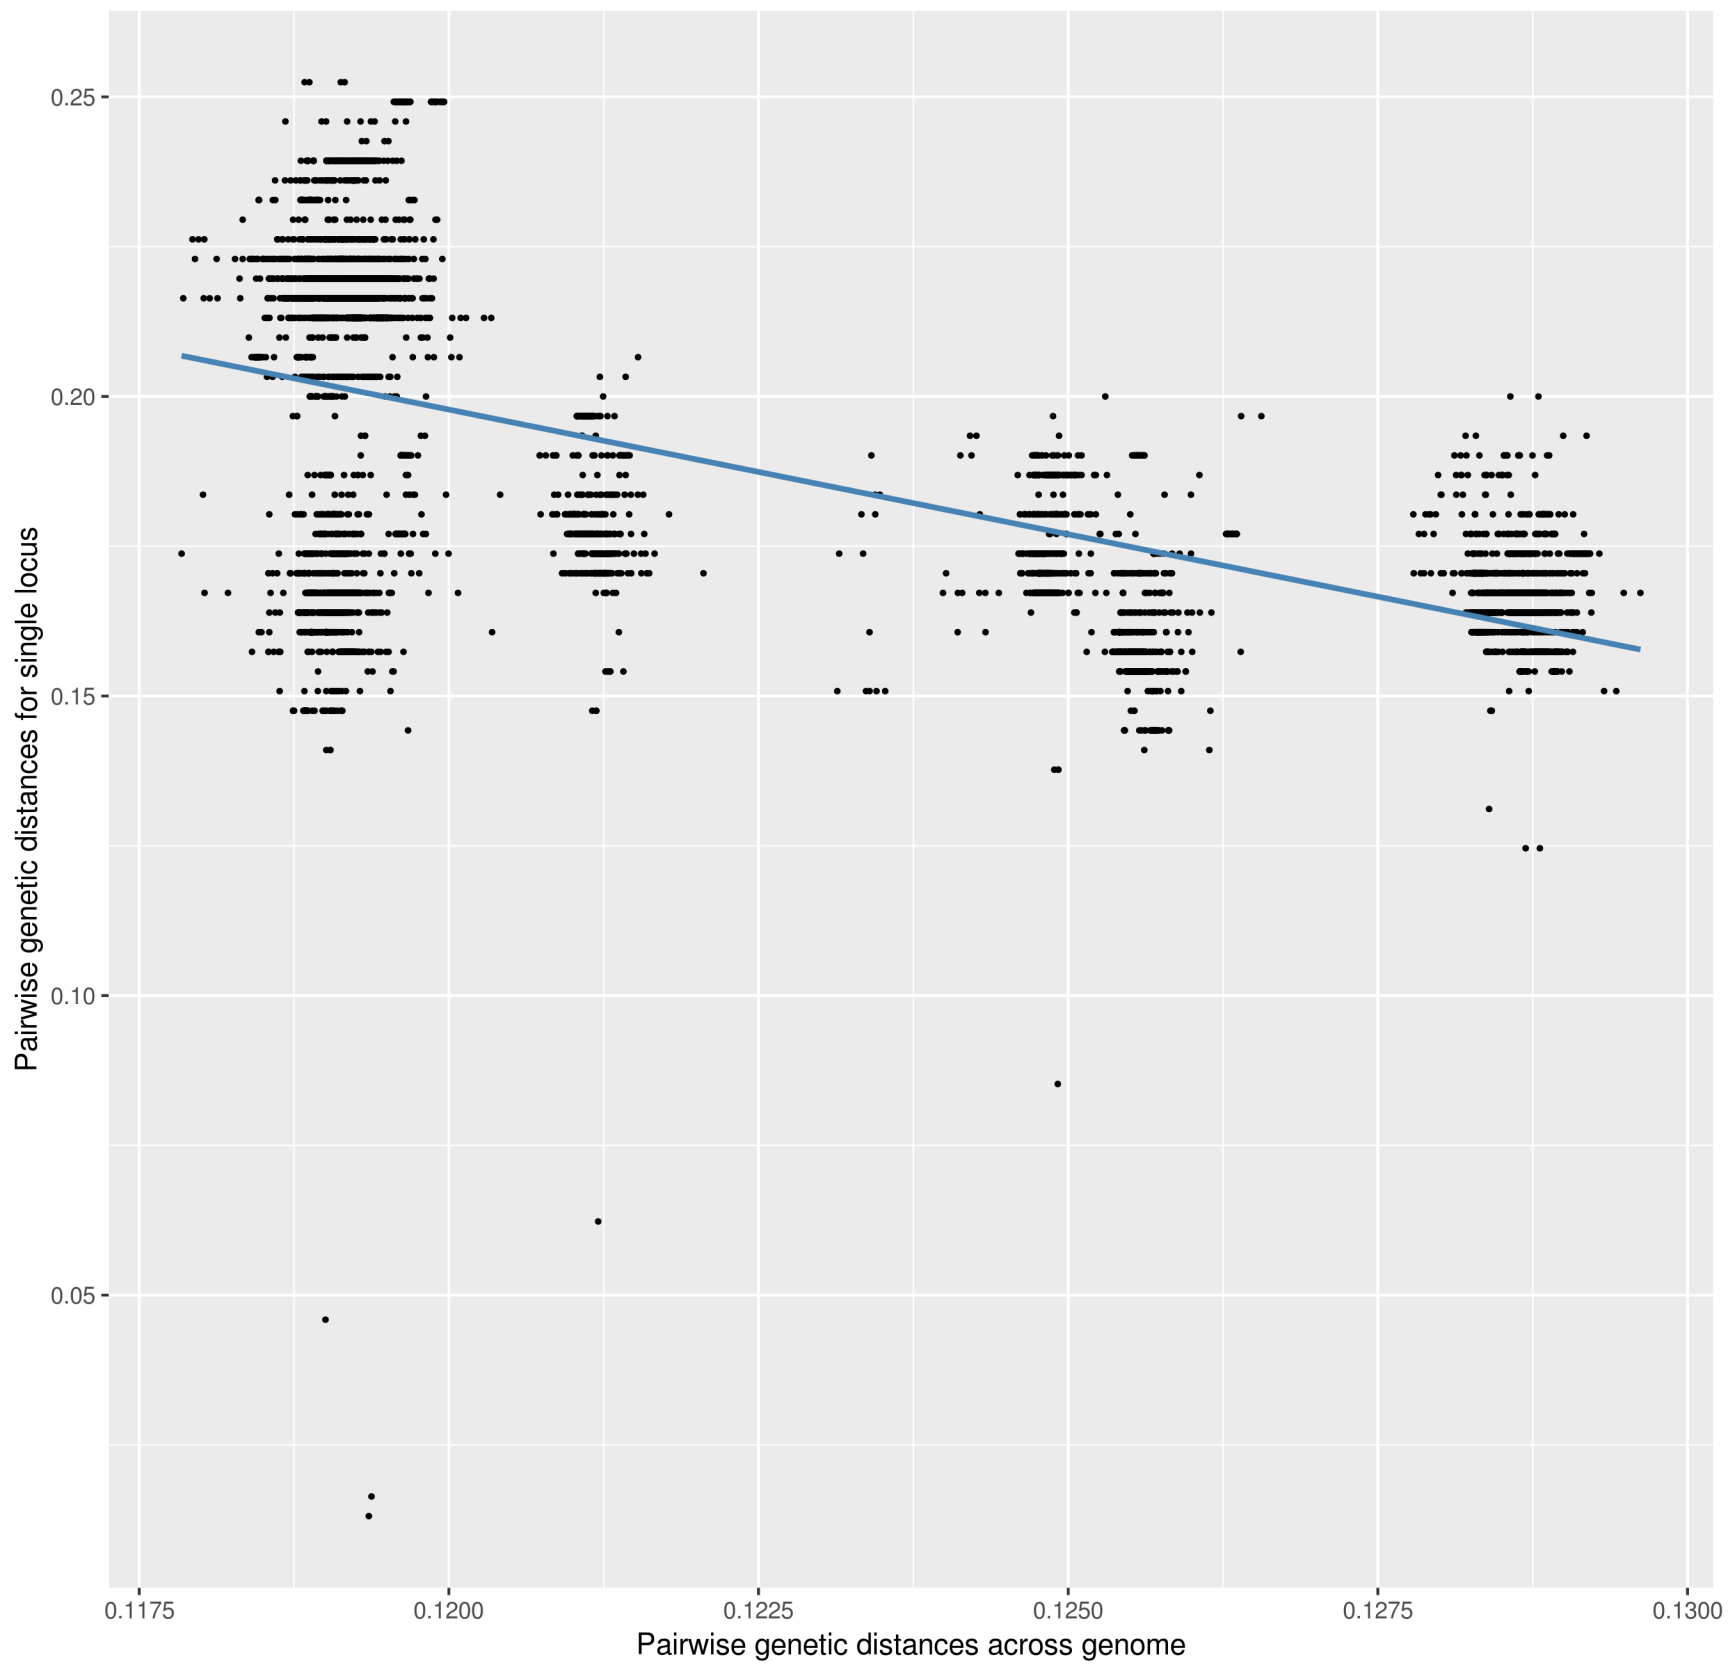



Oxf\_gyrB  $y = 0.99x + 0.00054$   $R^2=0.946378575269079$

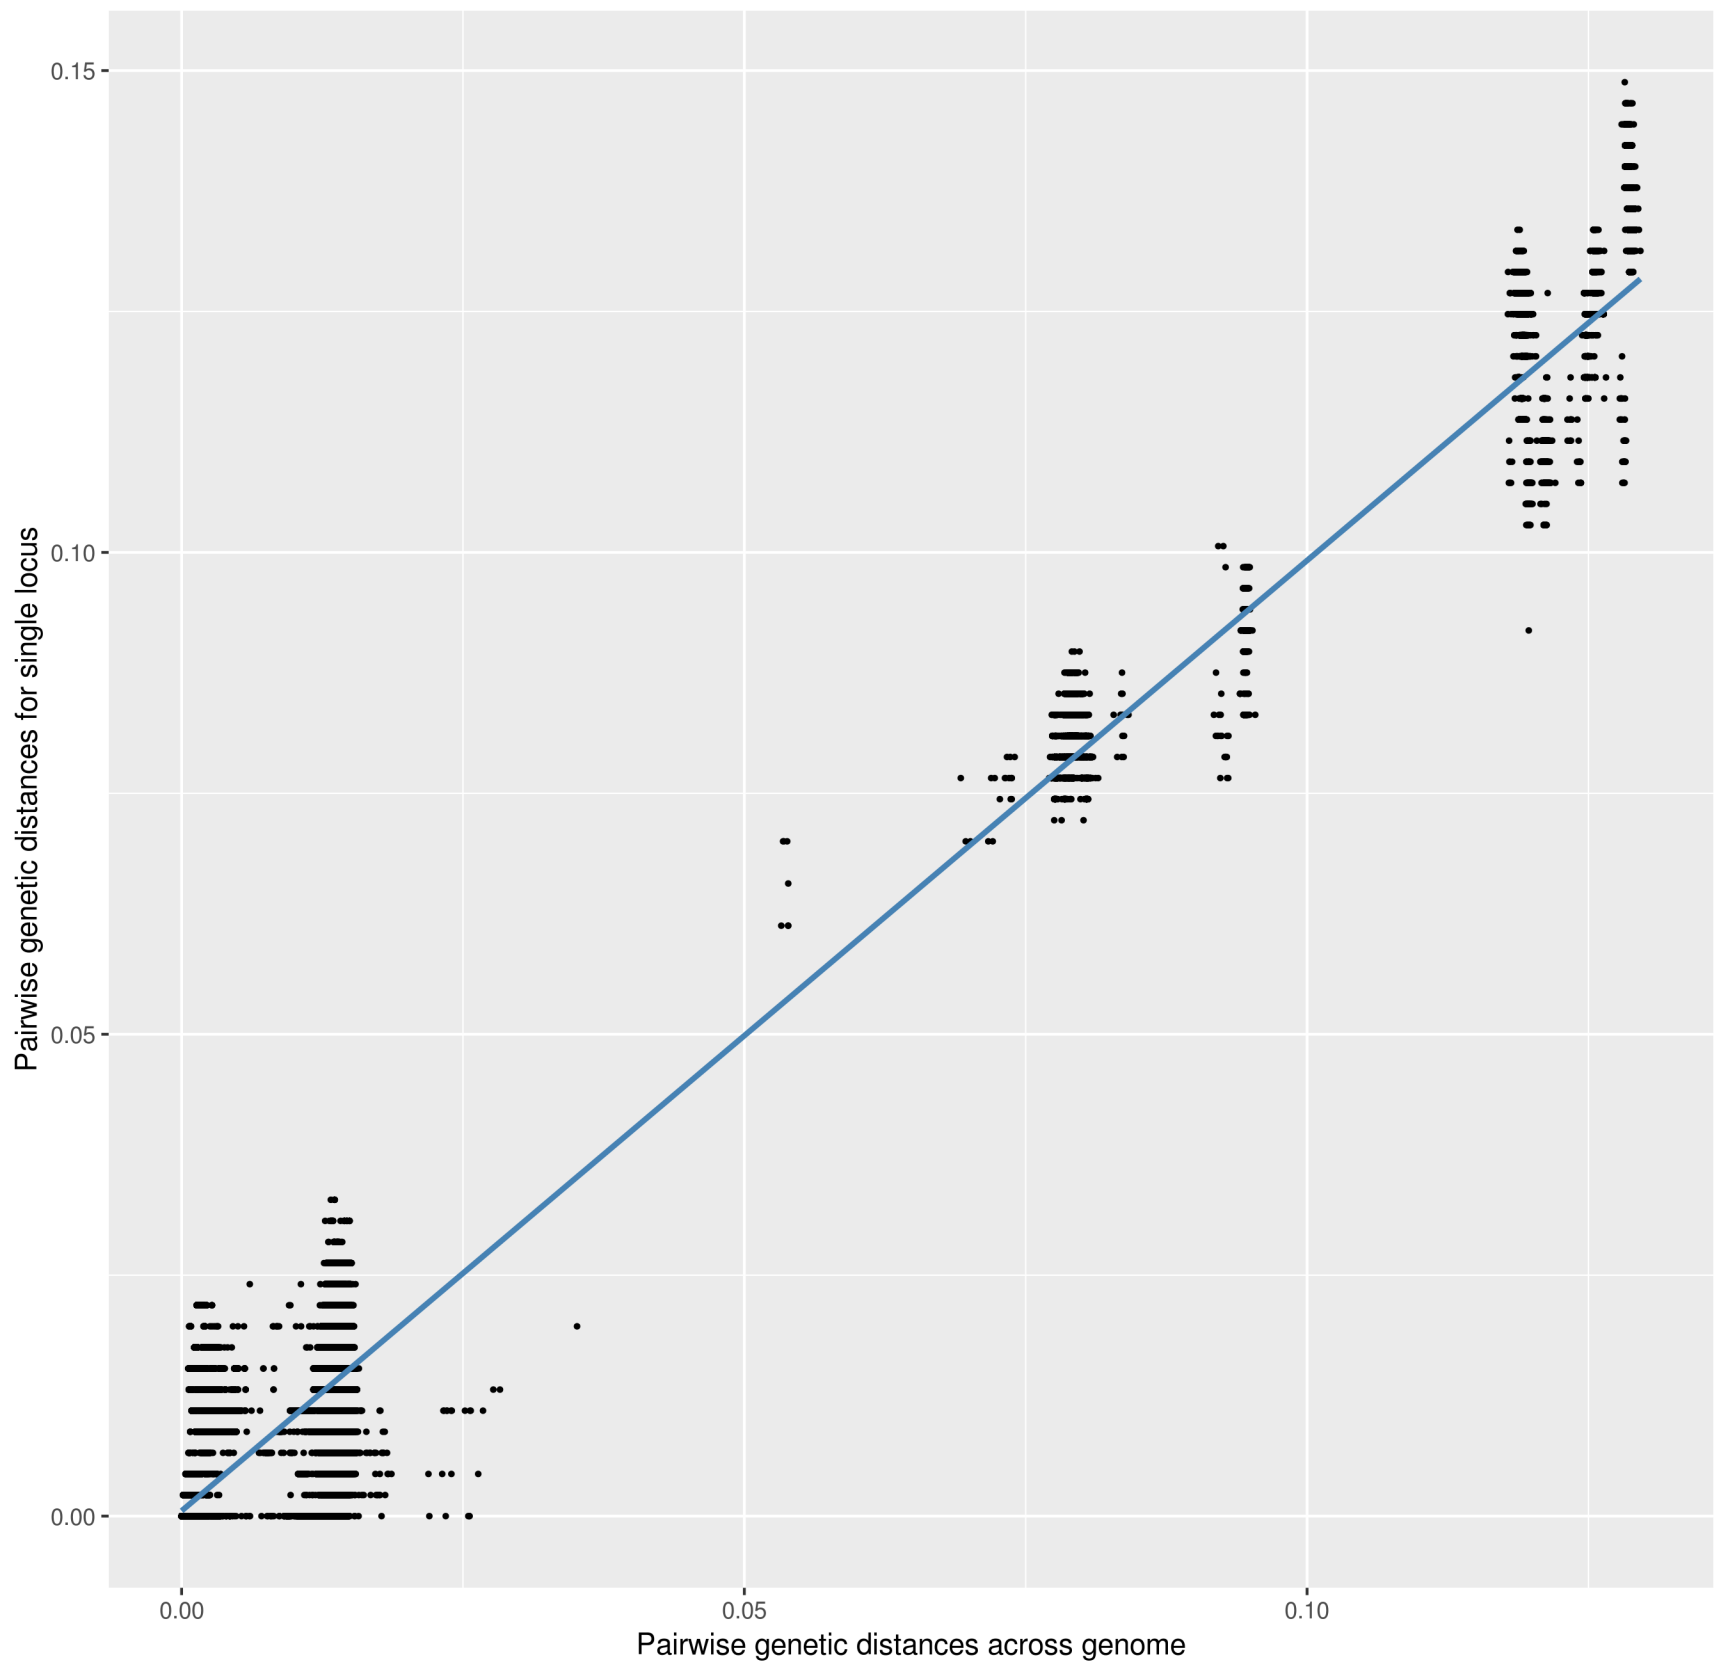

Oxf\_gyrB\_low\_distance  $y = 0.47x + 0.005$   $R^2=0.222625642708252$

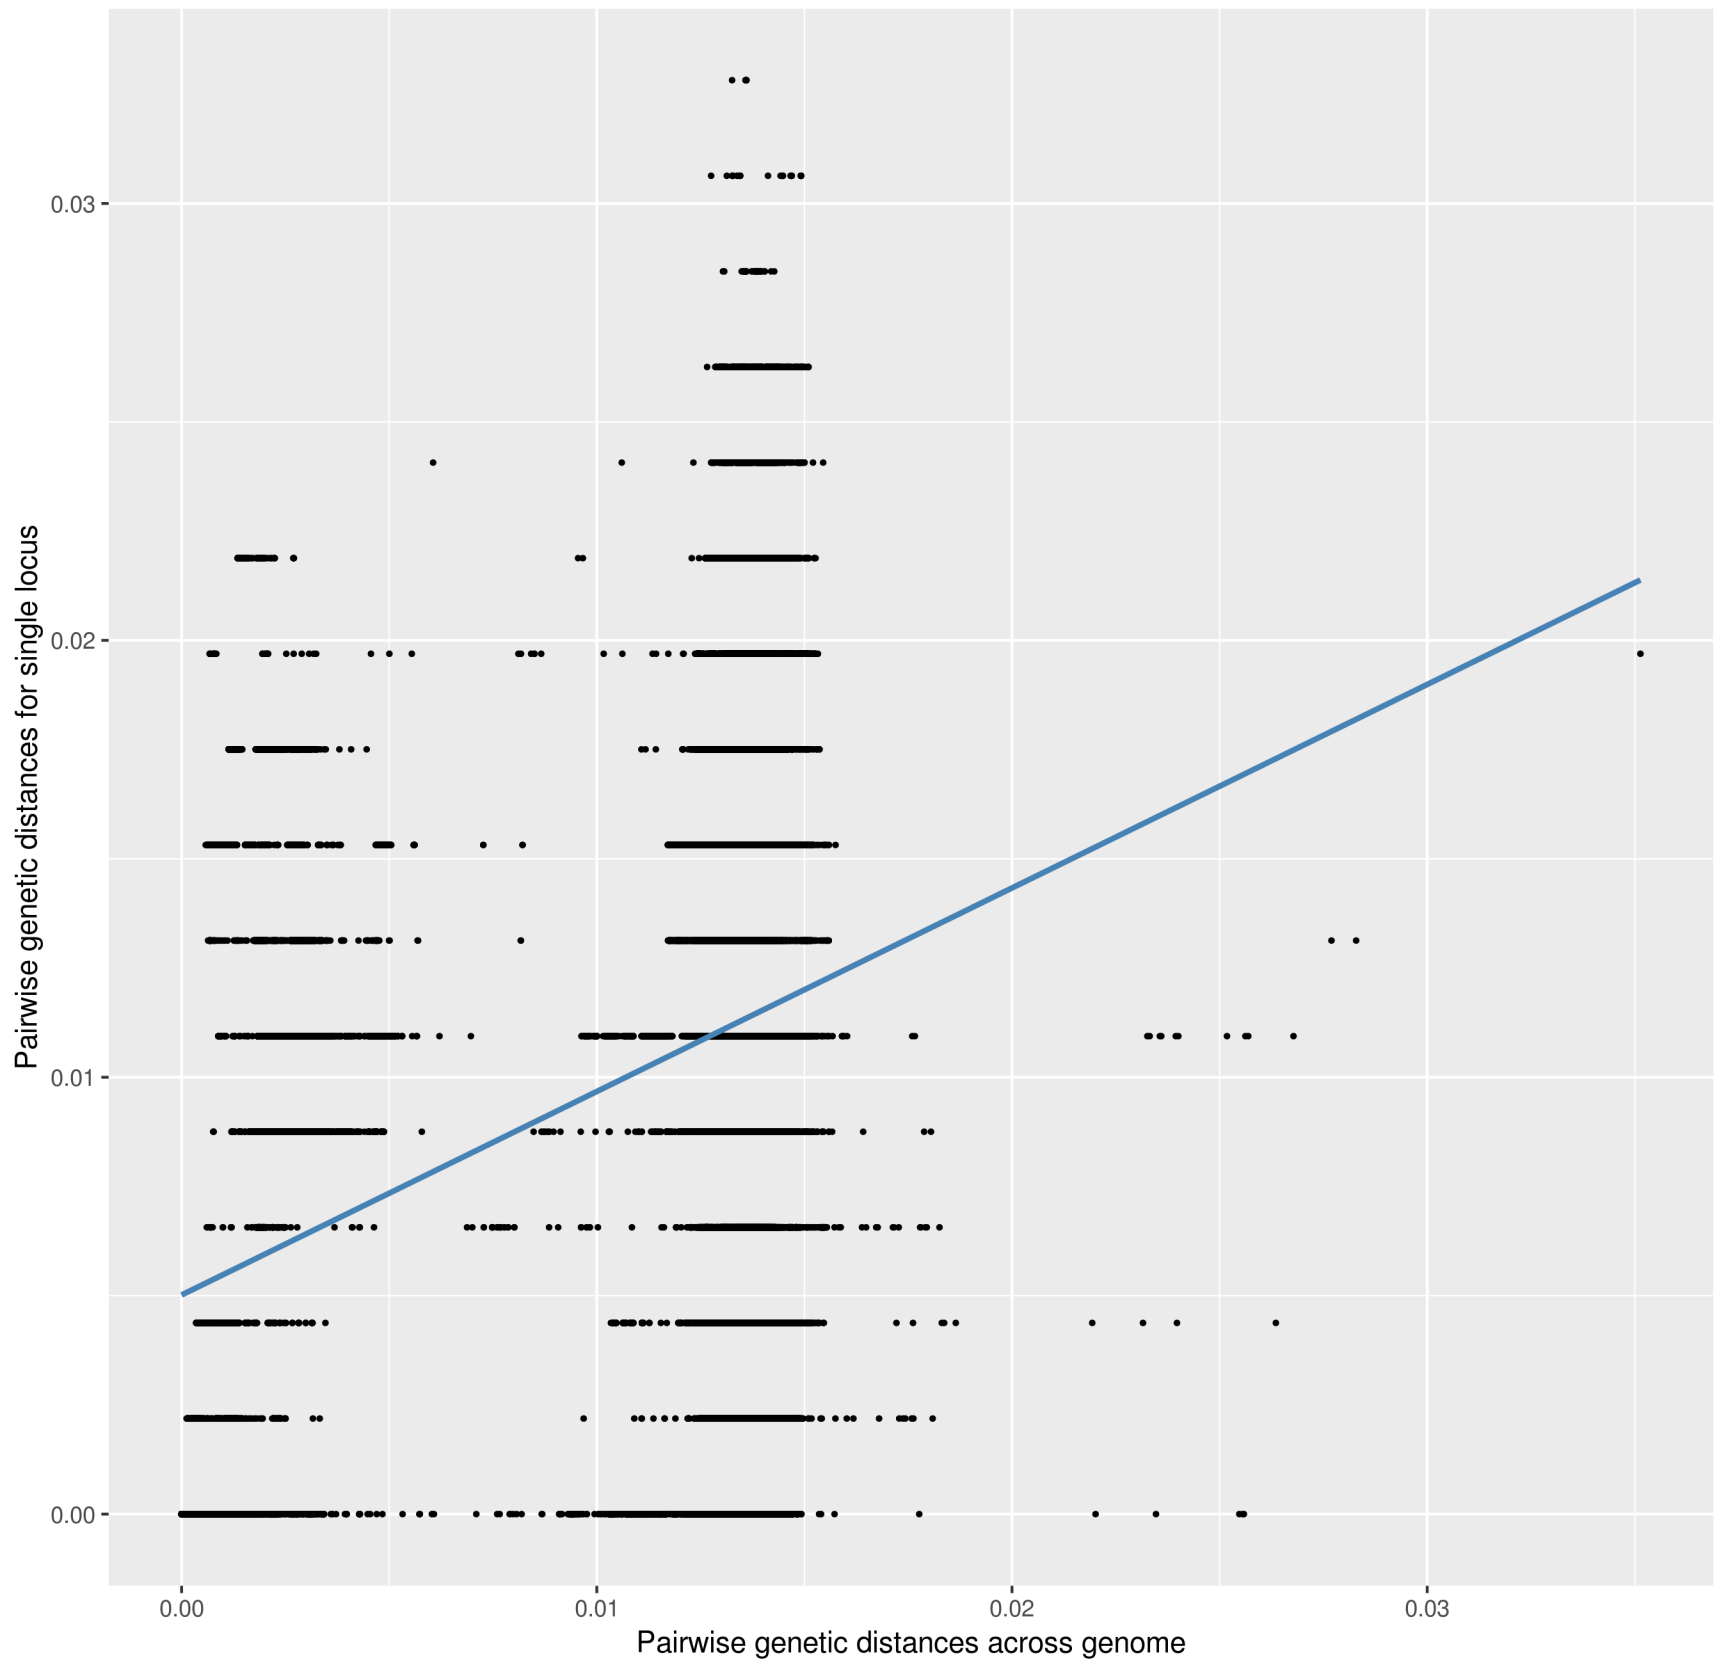



Oxf\_gyrB\_high\_distance  $y = 1.3x - 0.039$   $R^2=0.396423630380343$

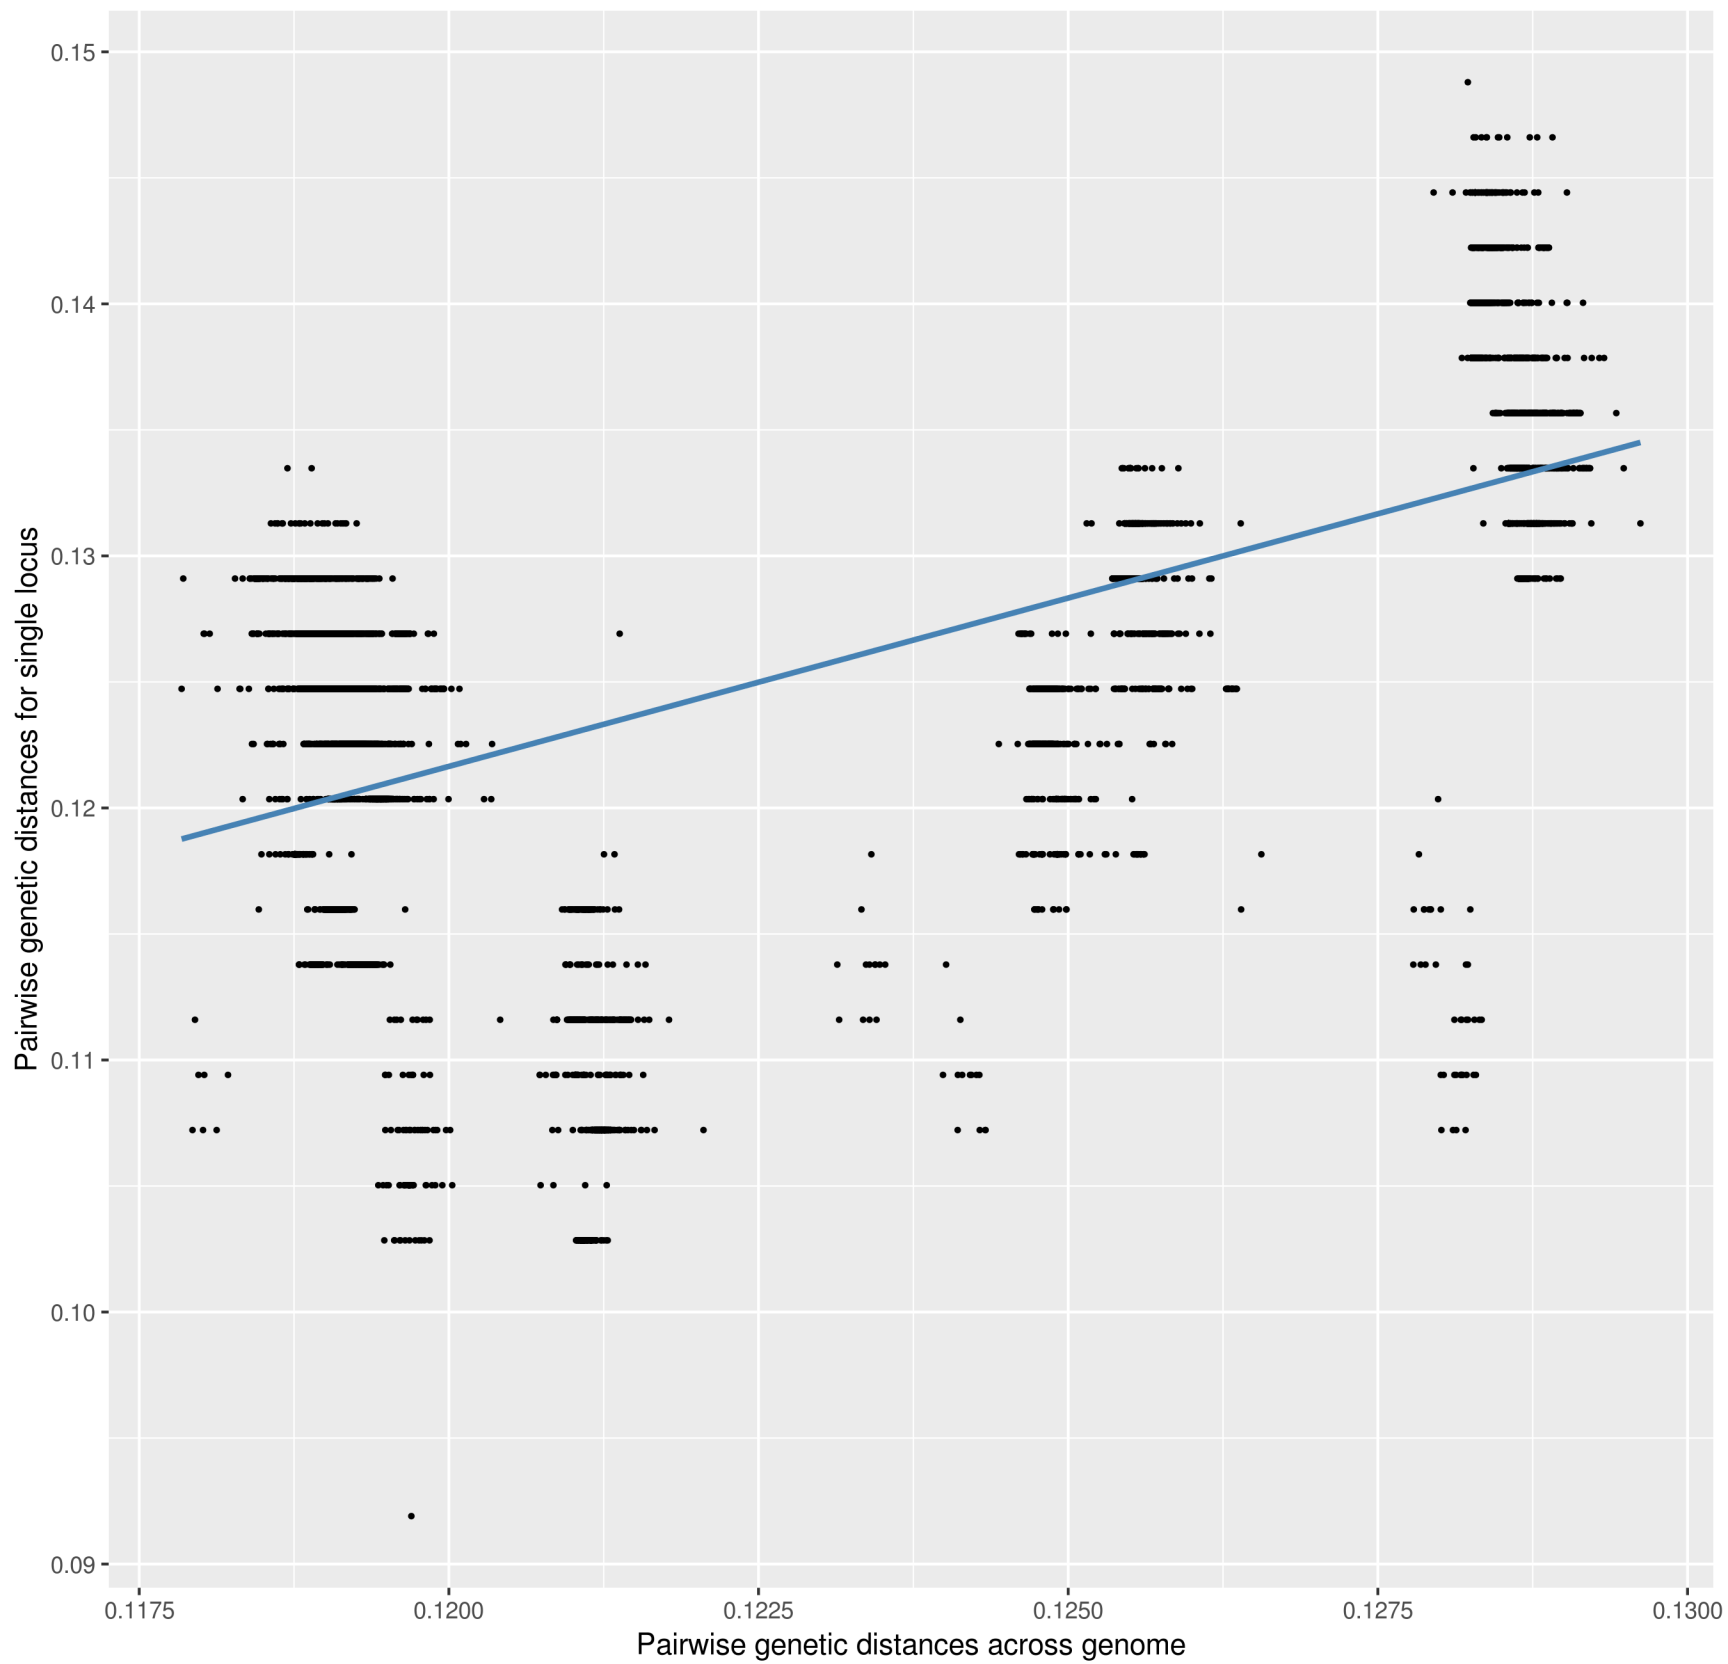

Oxf\_recA  $y = 1.2x - 0.0035$   $R^2=0.950345574156014$

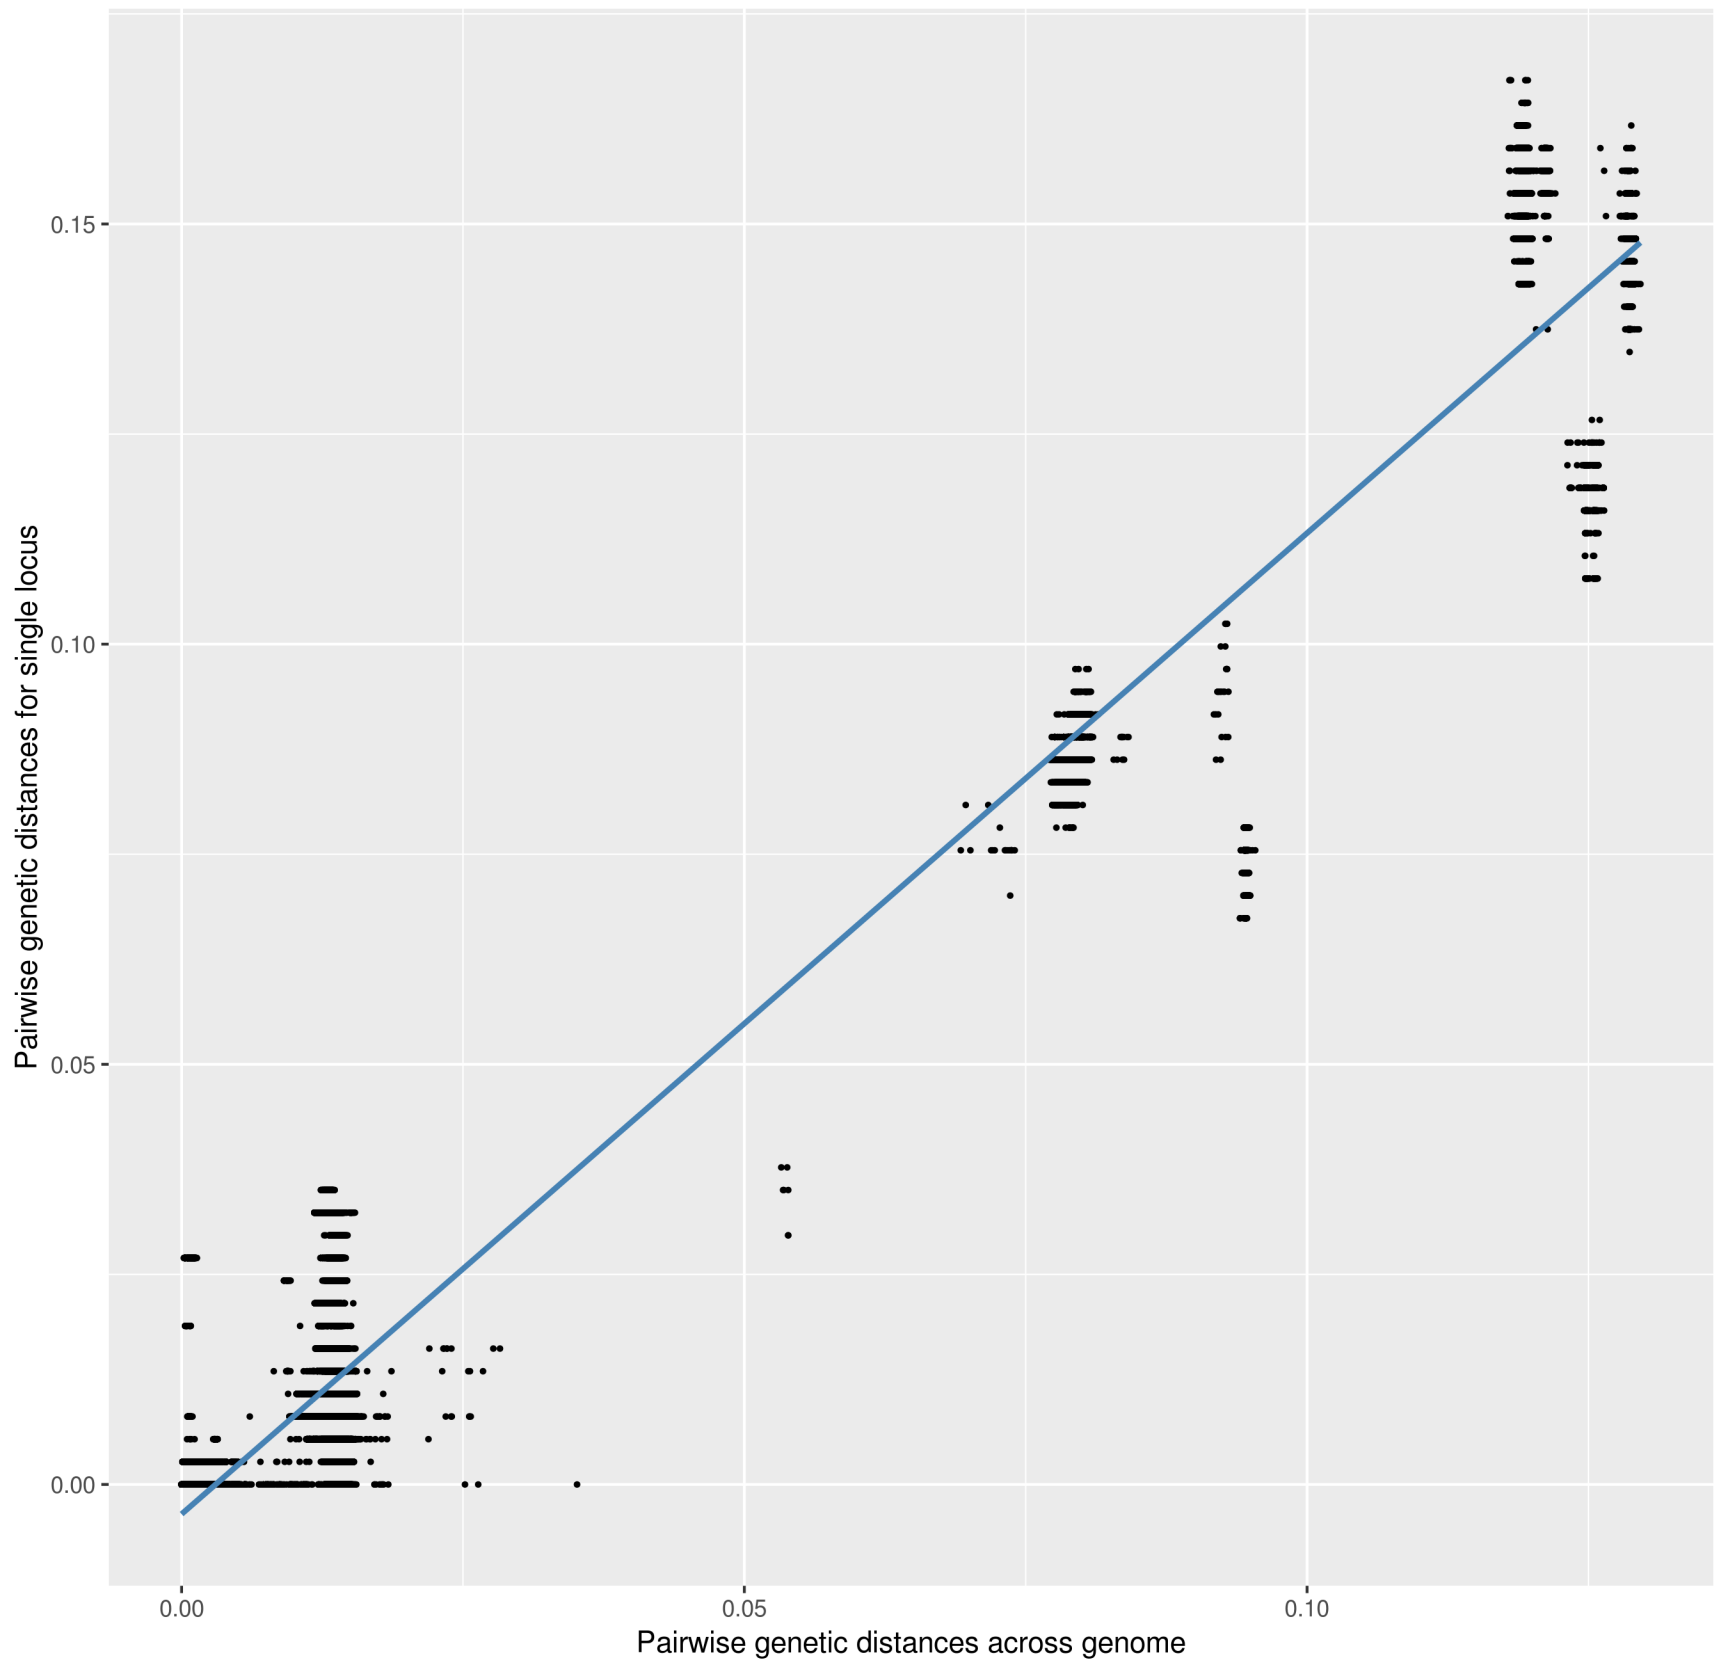

Oxf\_recA\_low\_distance  $y = 0.86x - 0.00083$   $R^2=0.453850924328798$

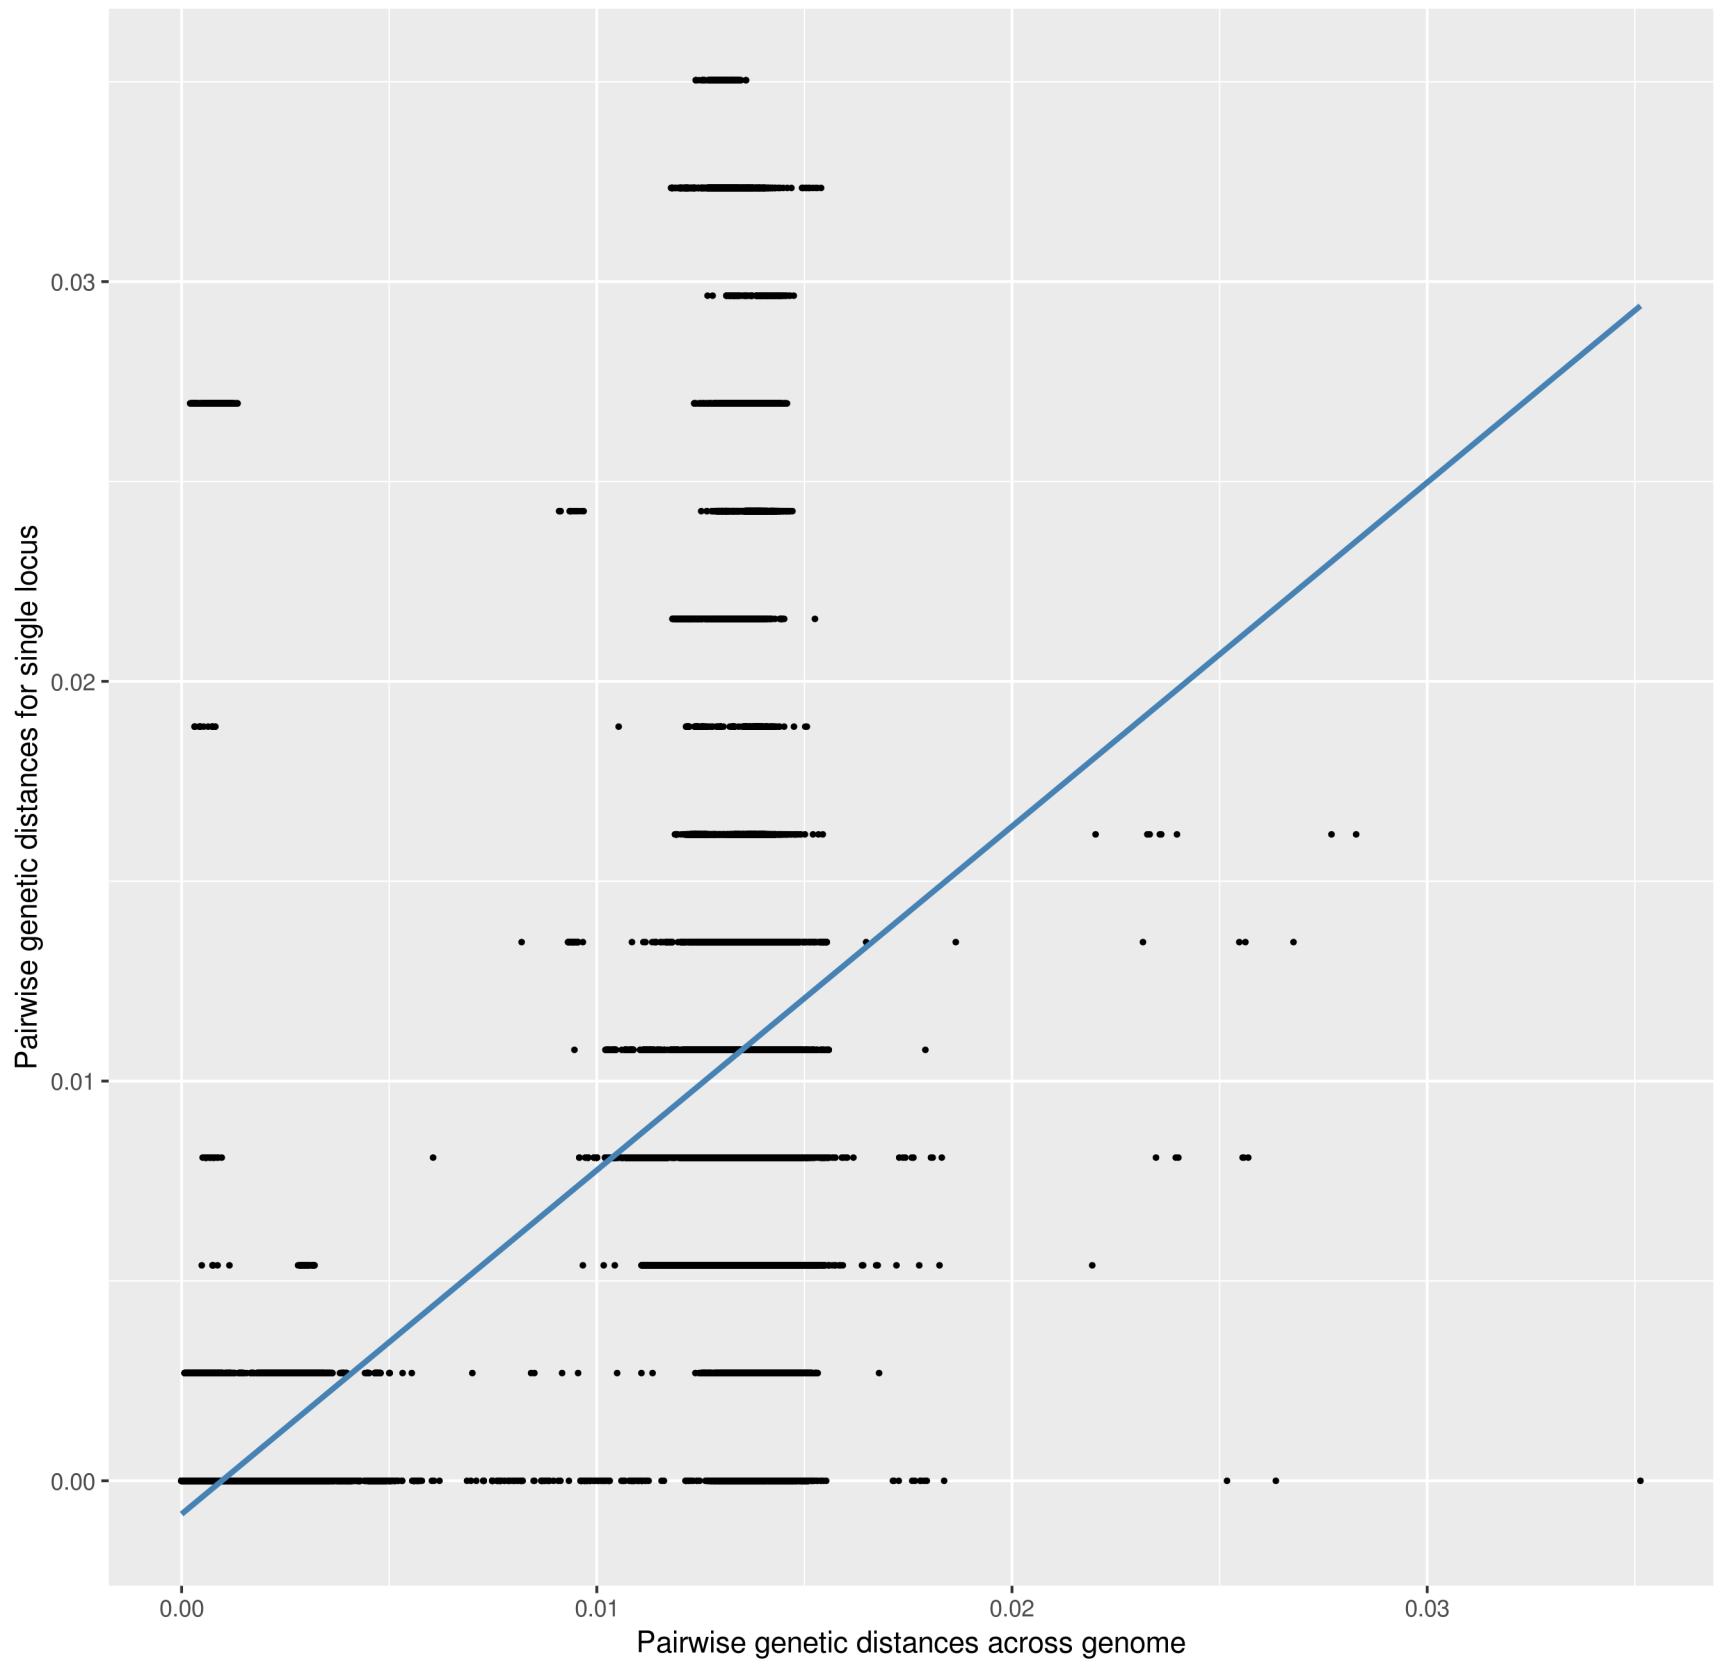



Oxf\_recA\_high\_distance  $y = -1.7x + 0.36$   $R^2=0.260595187185066$

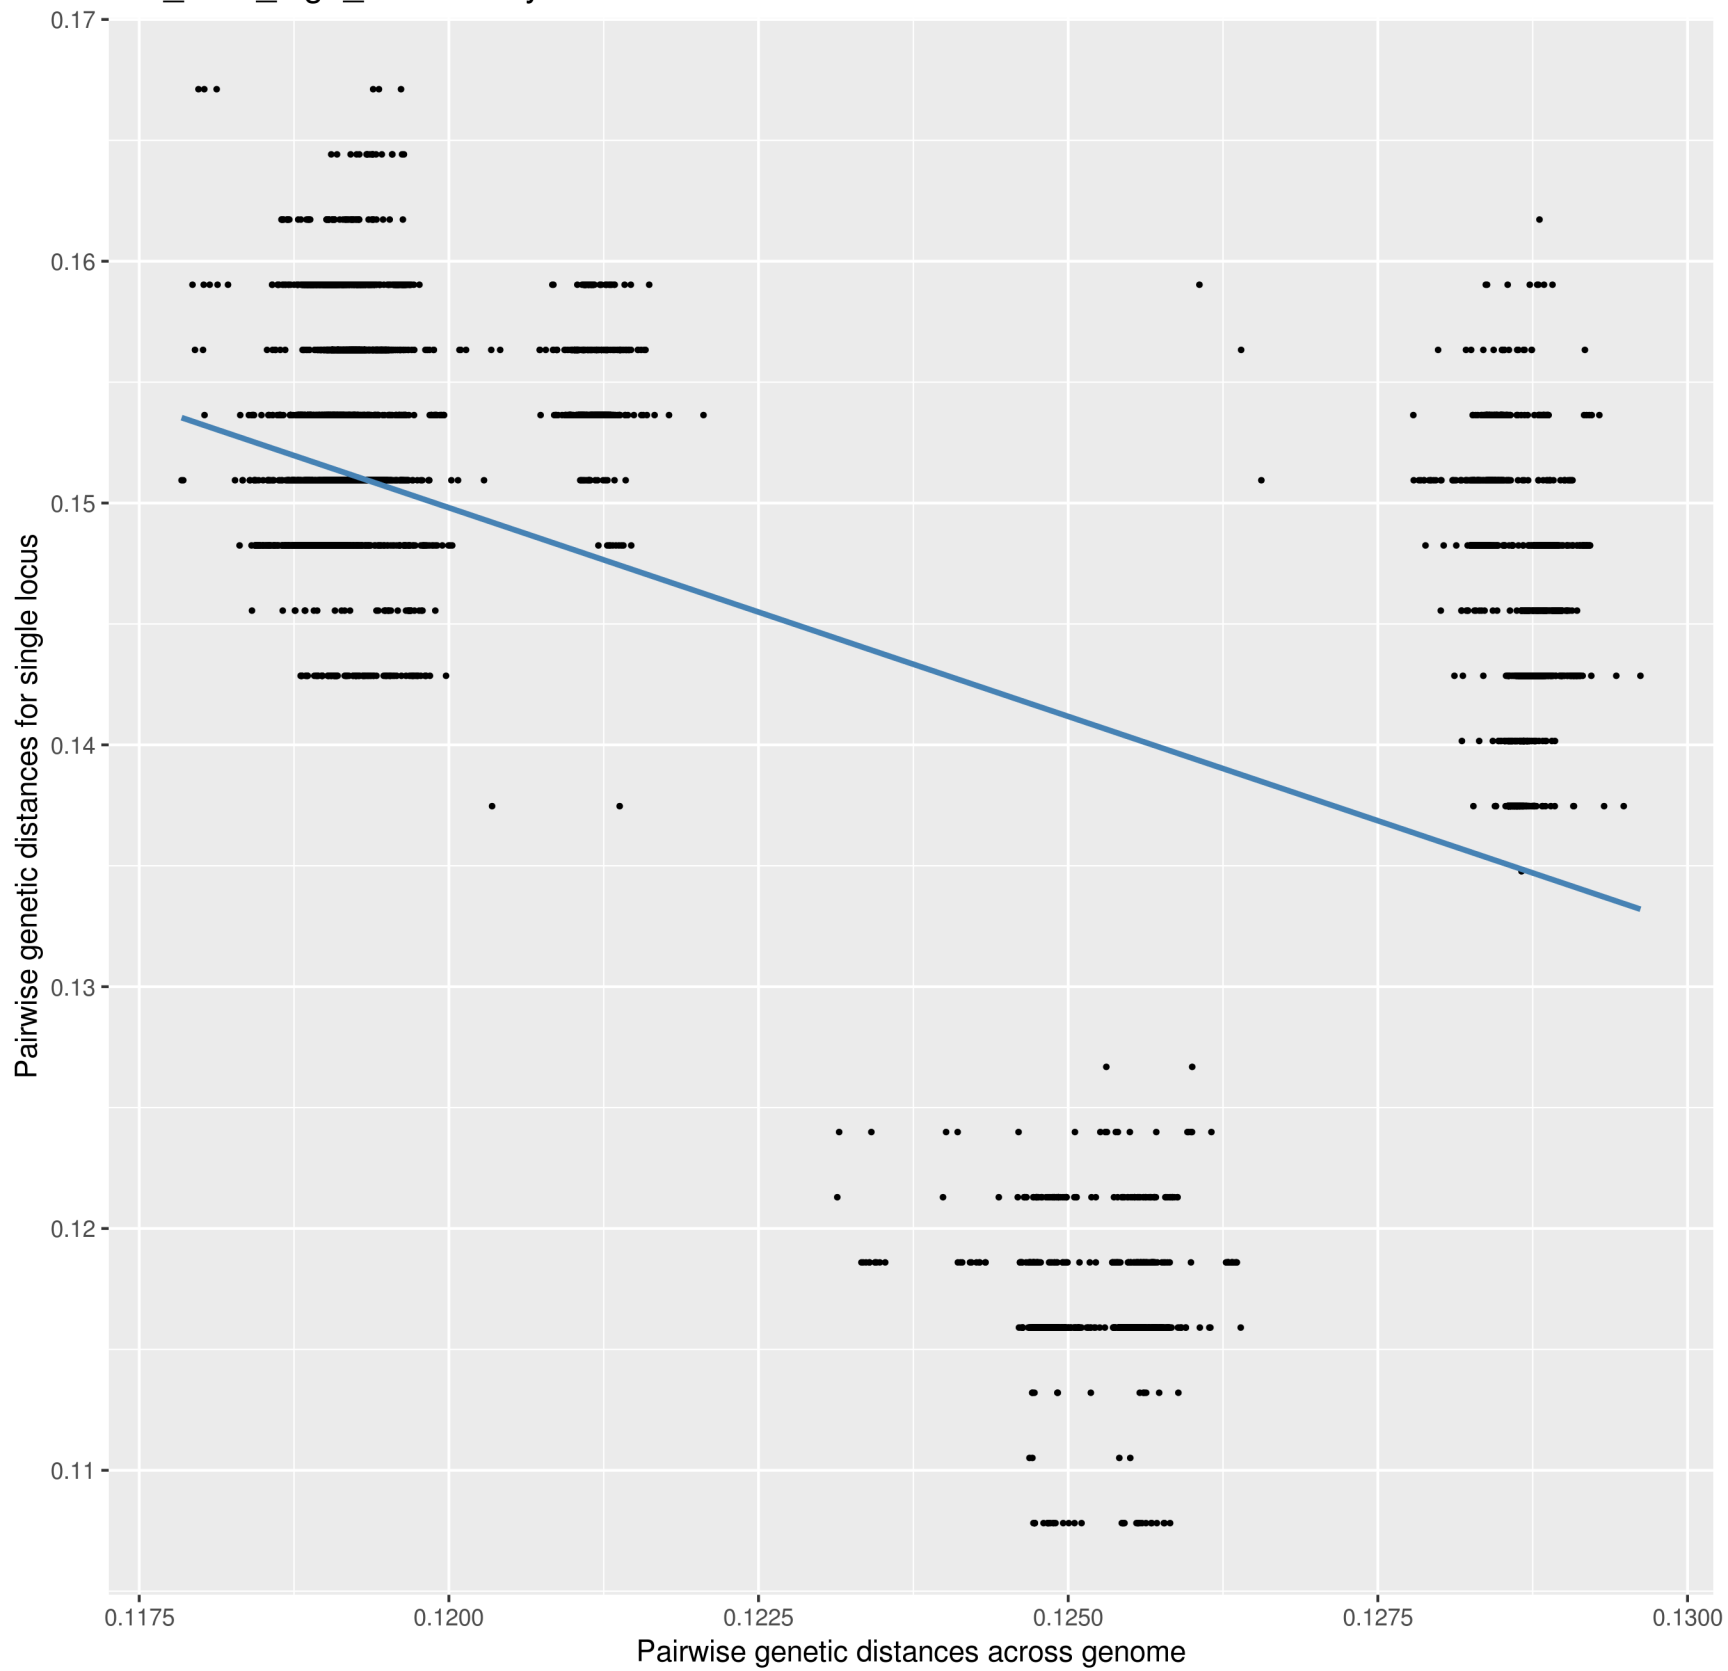



Oxf\_rpoD  $y = 0.82x - 0.0041$   $R^2=0.890051253972064$

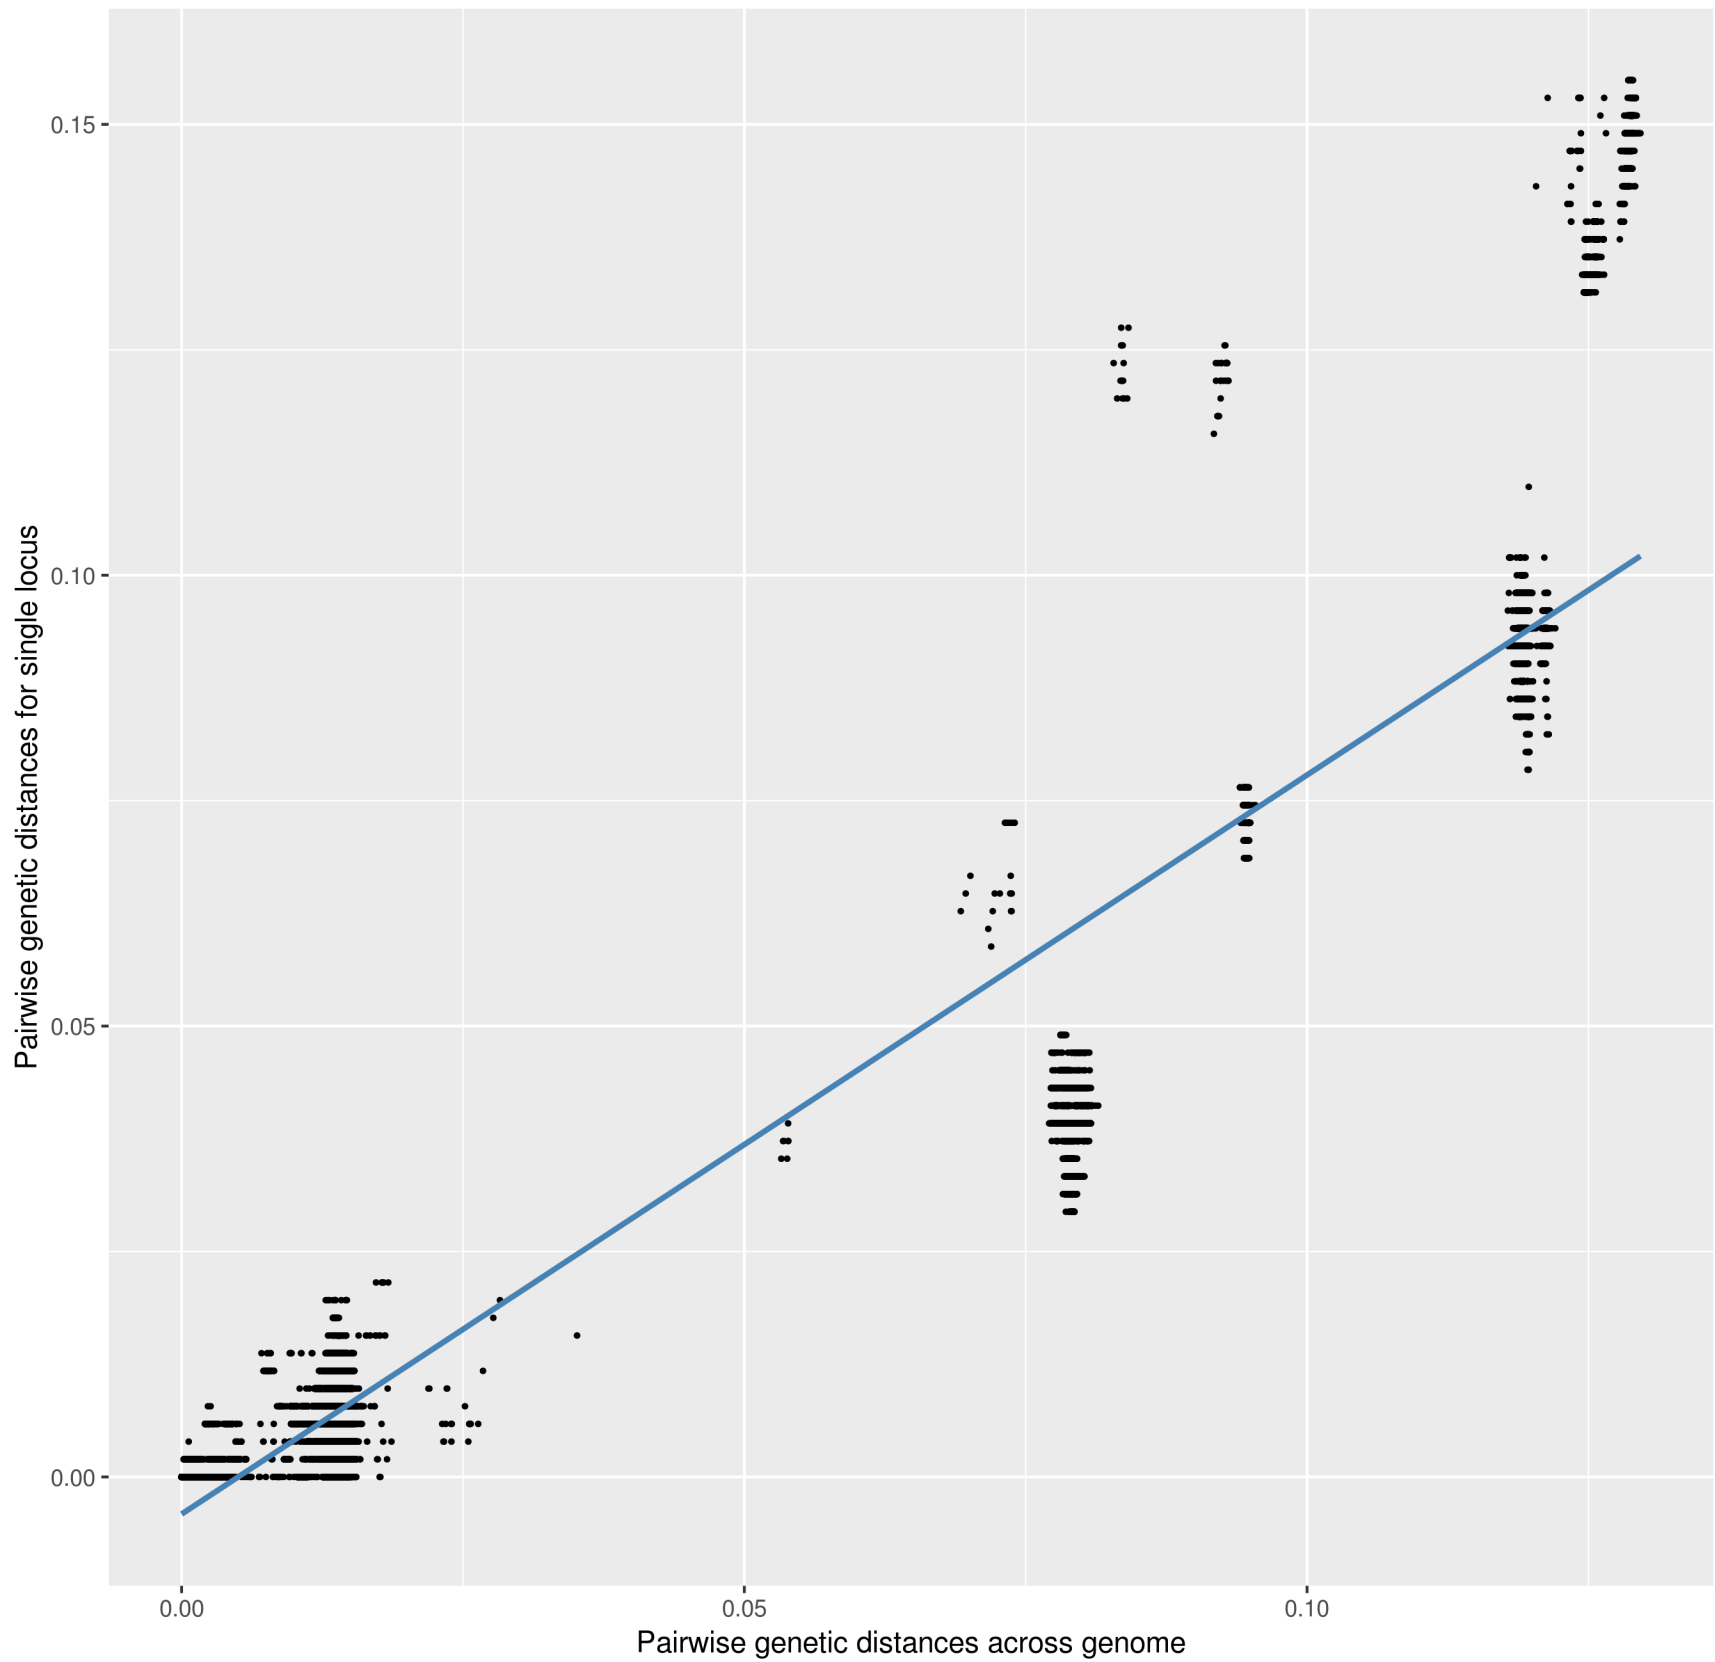

Oxf\_rpoD\_low\_distance  $y = 0.44x - 0.00053$   $R^2=0.634669460033387$

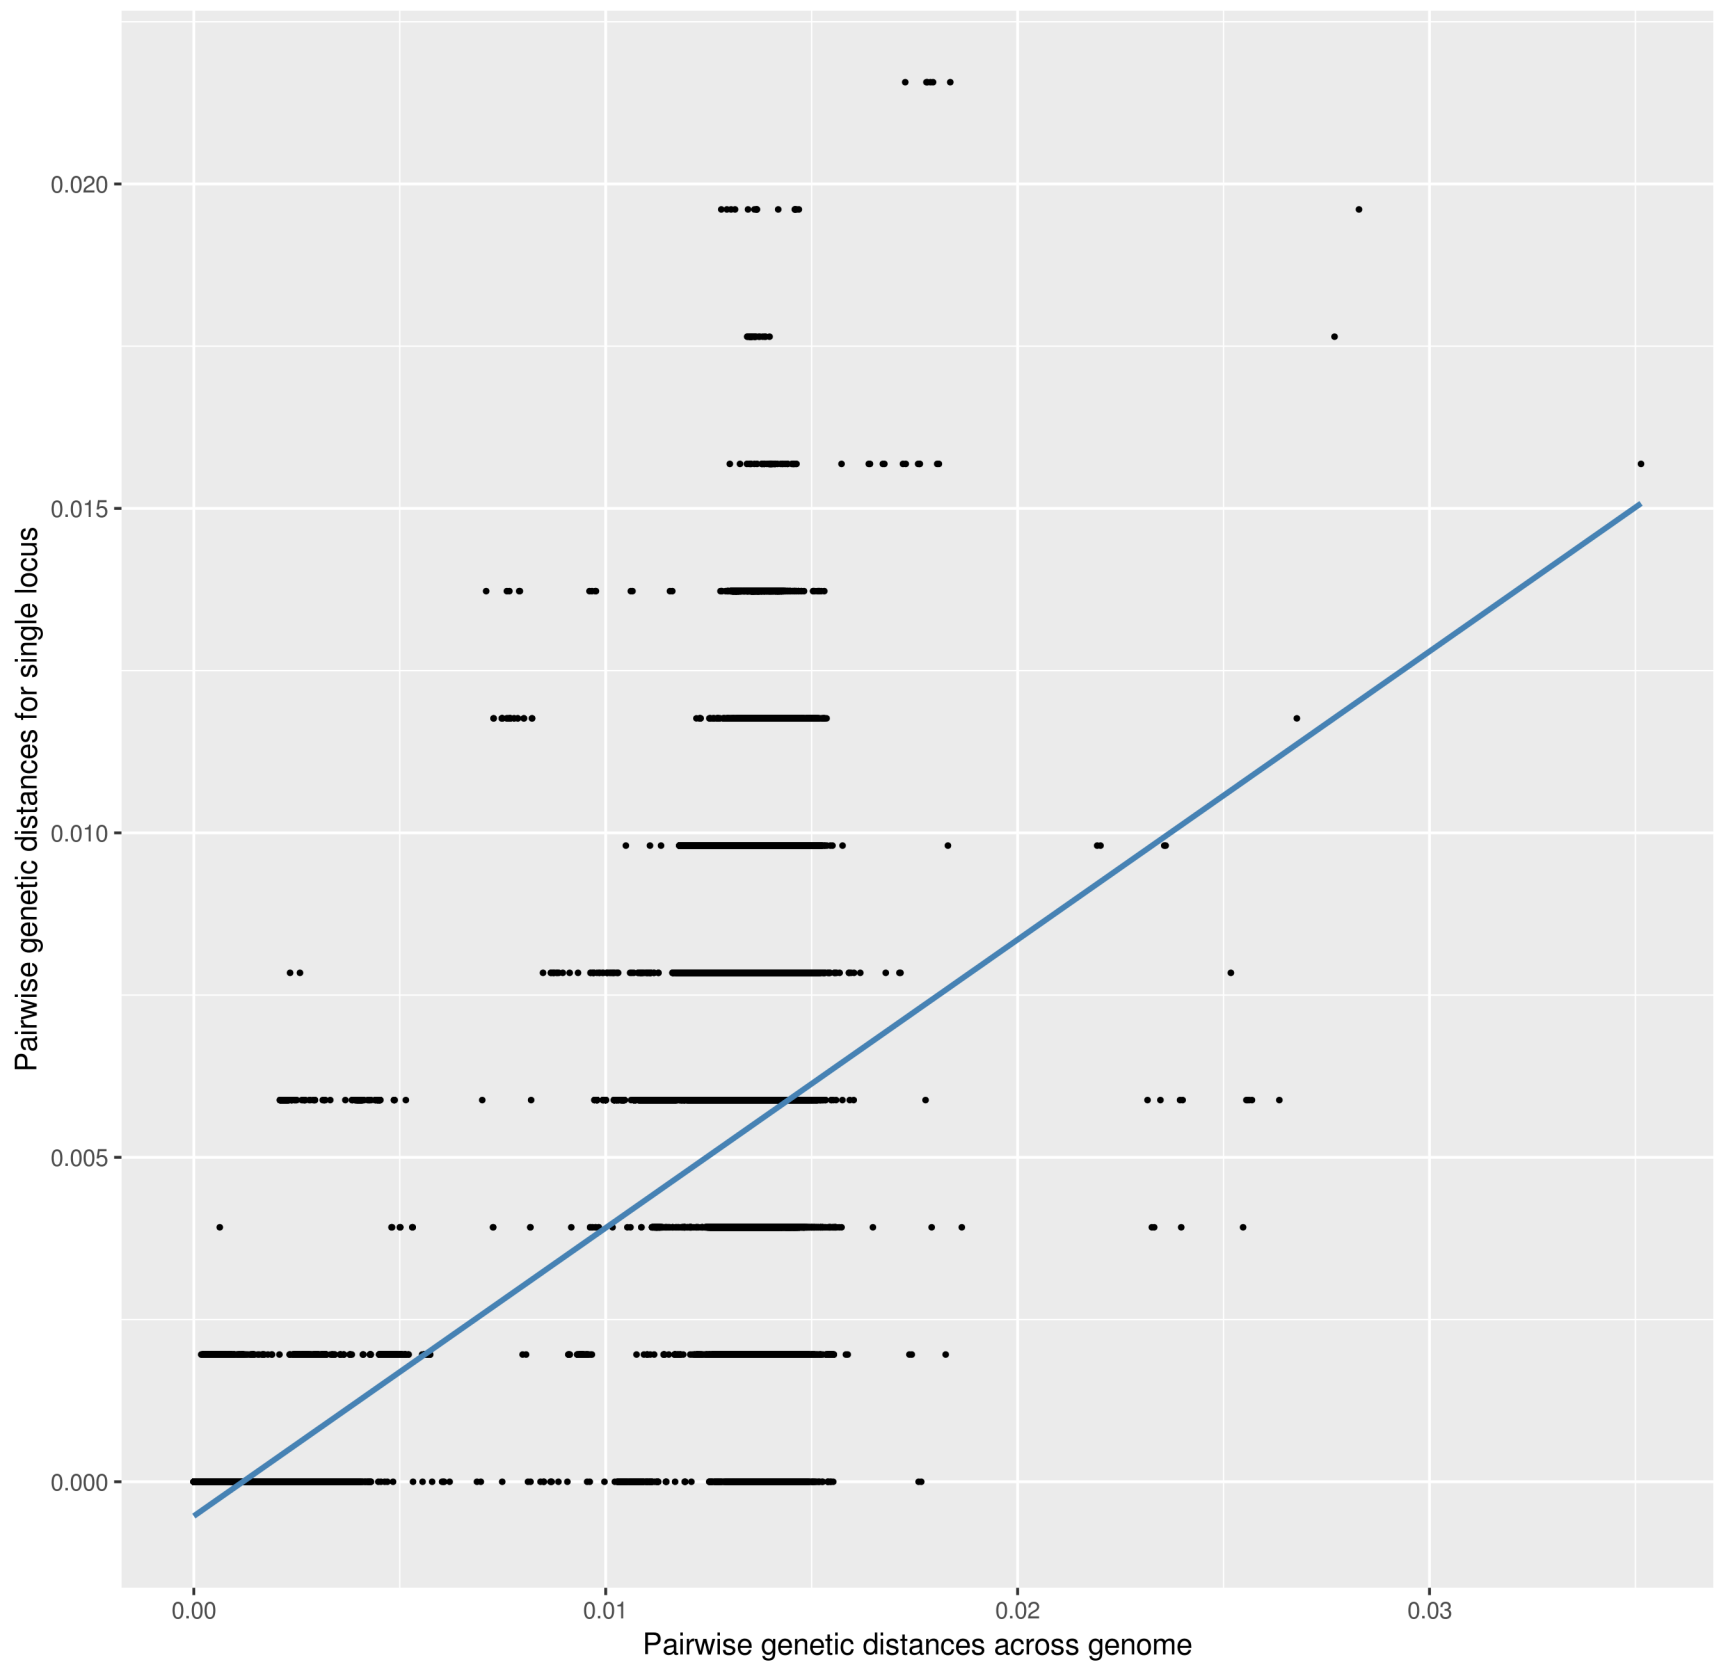

Oxf\_rpoD\_mid\_distance  $y = 2.3x - 0.14$   $R^2=0.682433378741542$

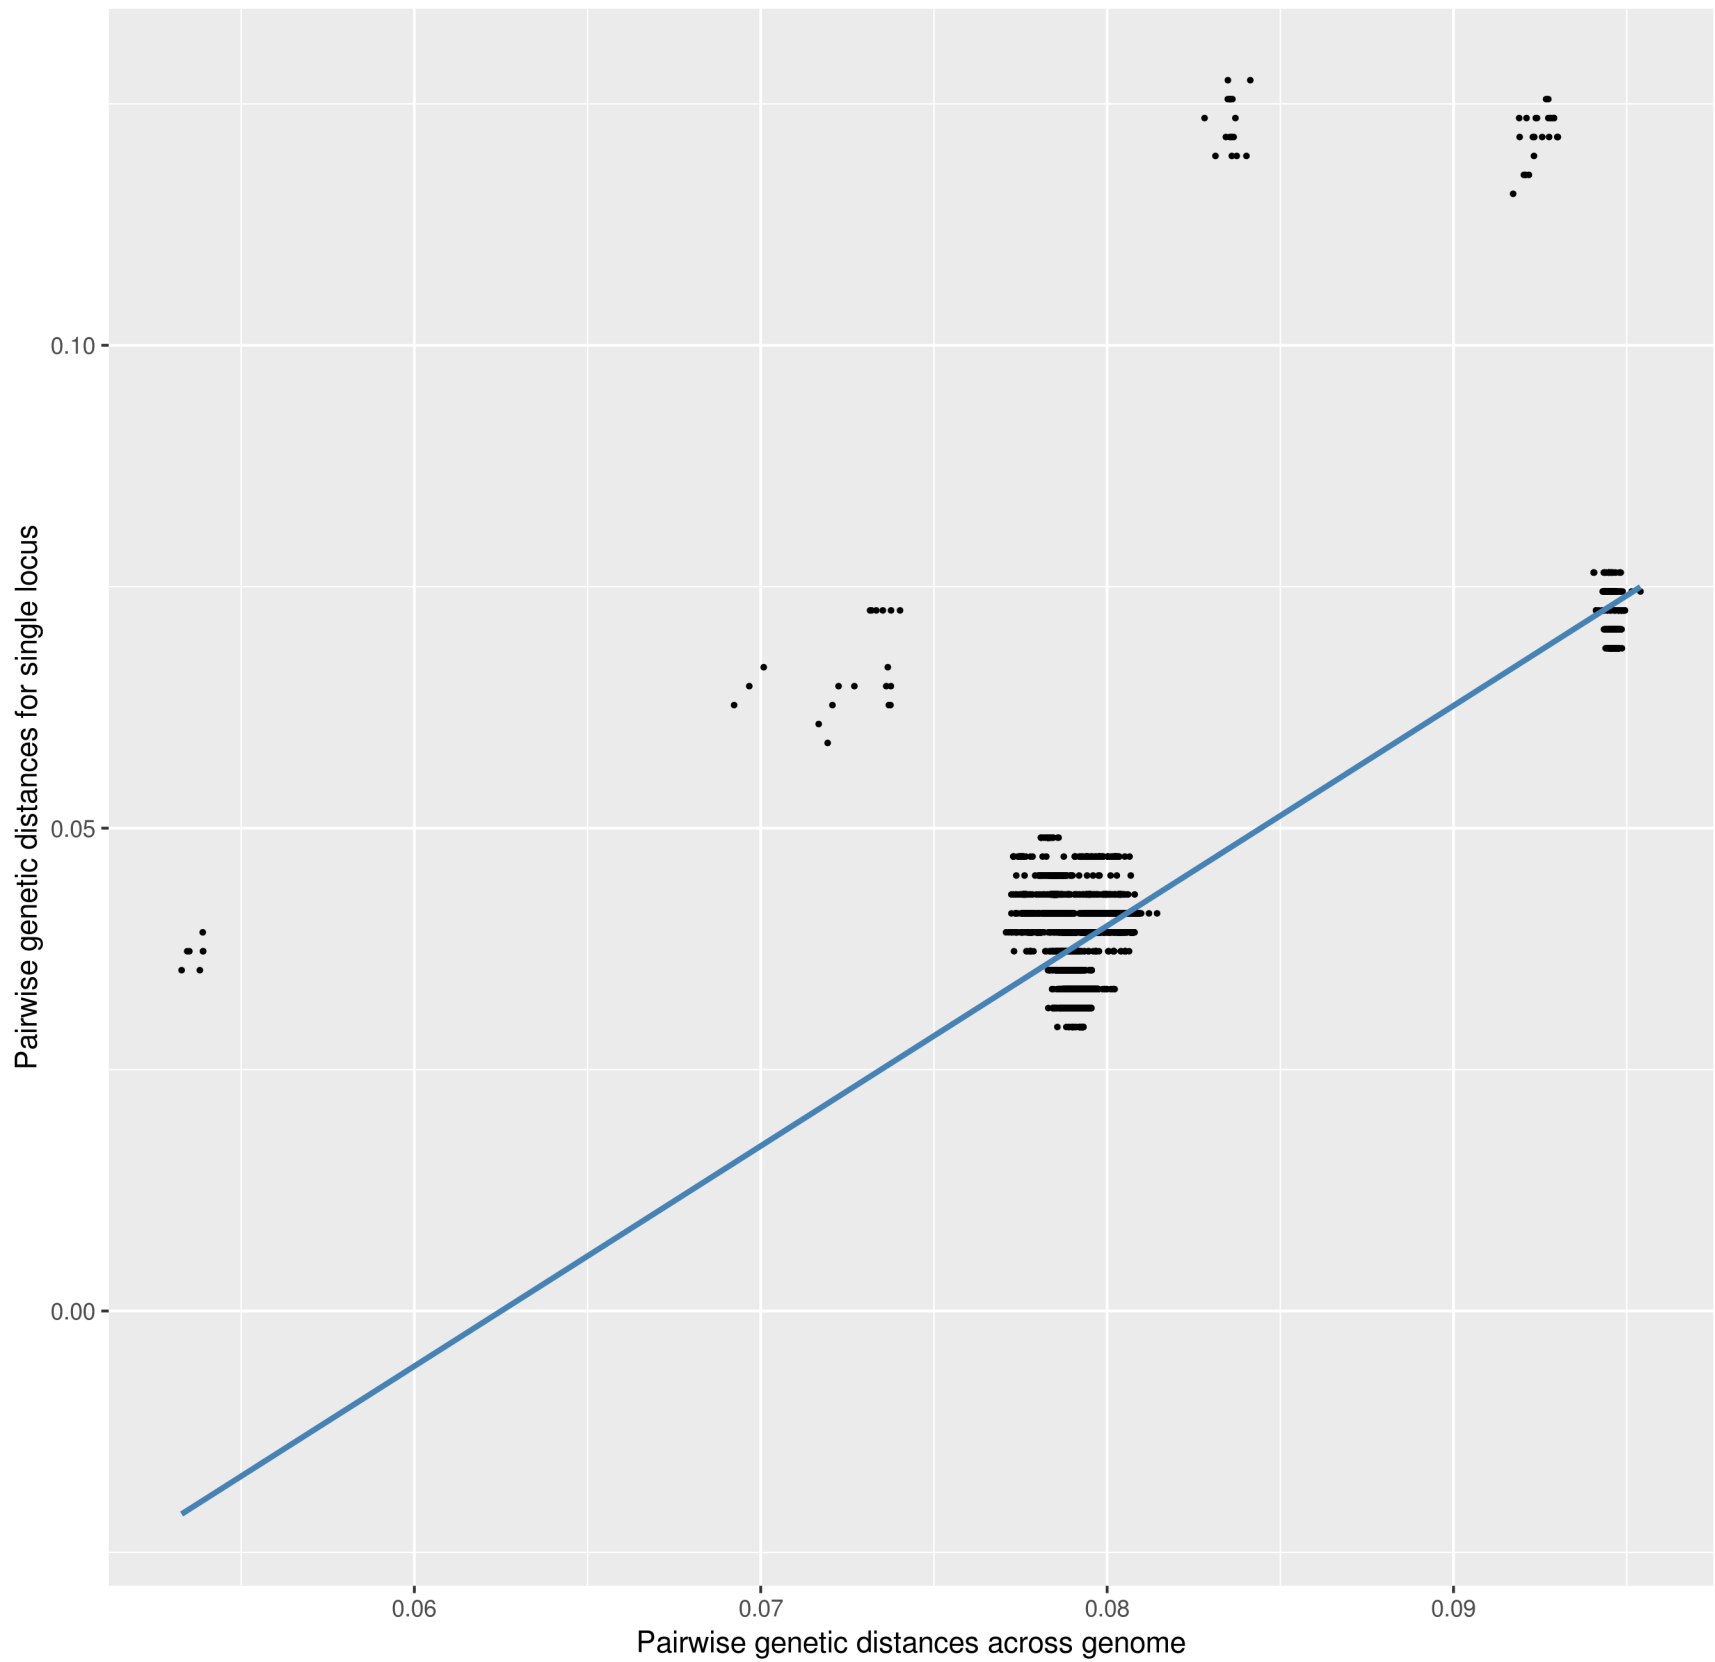

Oxf\_rpoD\_high\_distance  $y = 5.9x - 0.61$   $R^2=0.958802339743956$

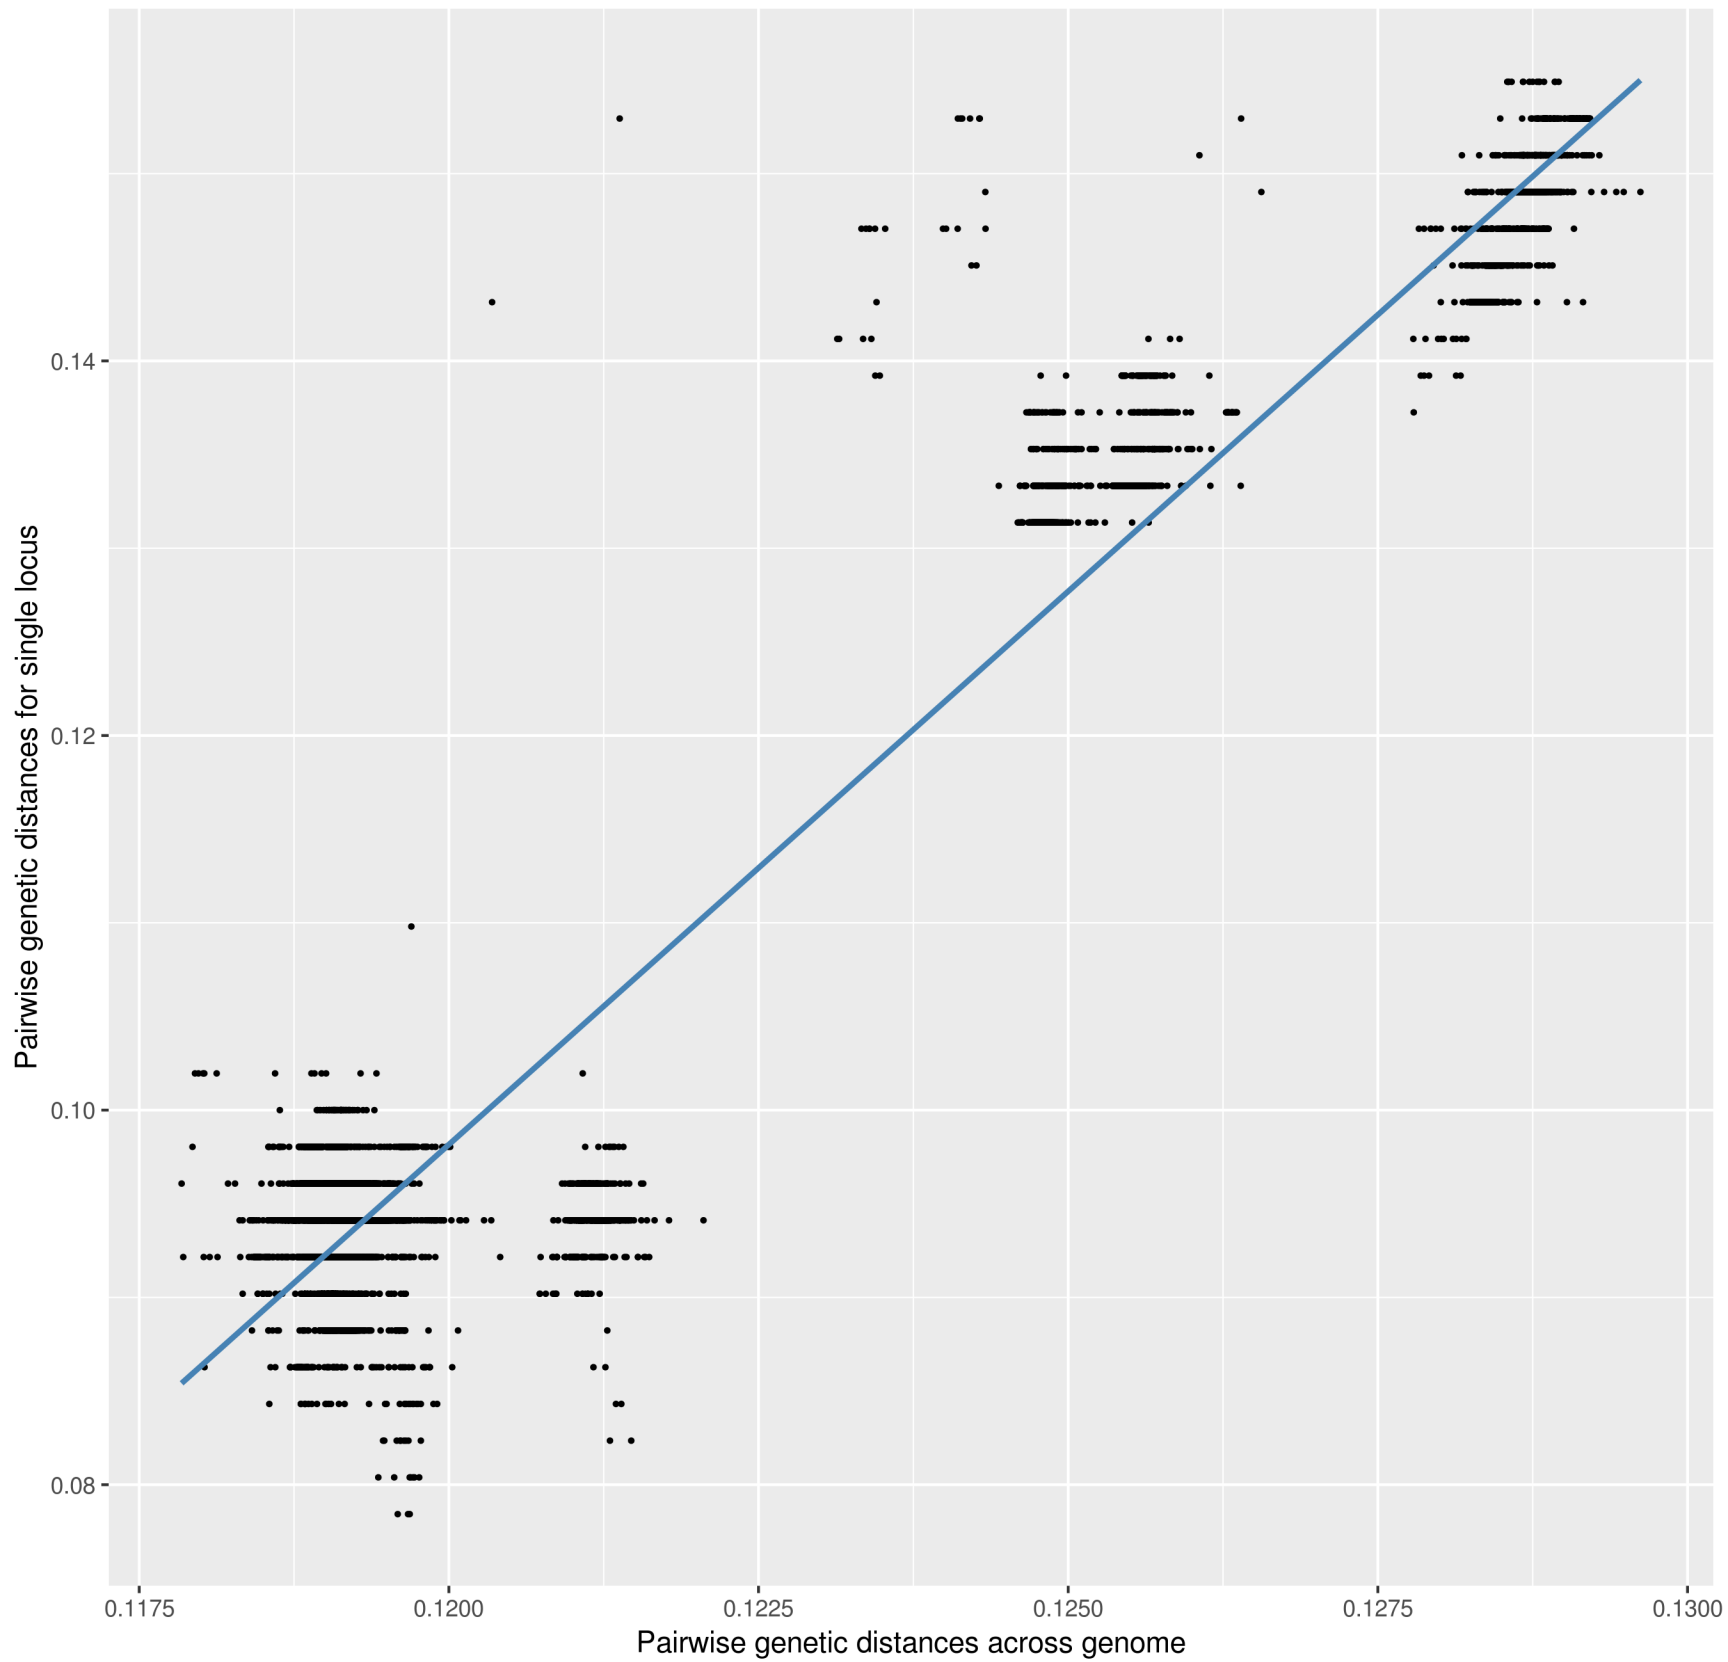

Pas\_cpn60P  $y = 0.49x - 0.0011$   $R^2=0.932246842157145$

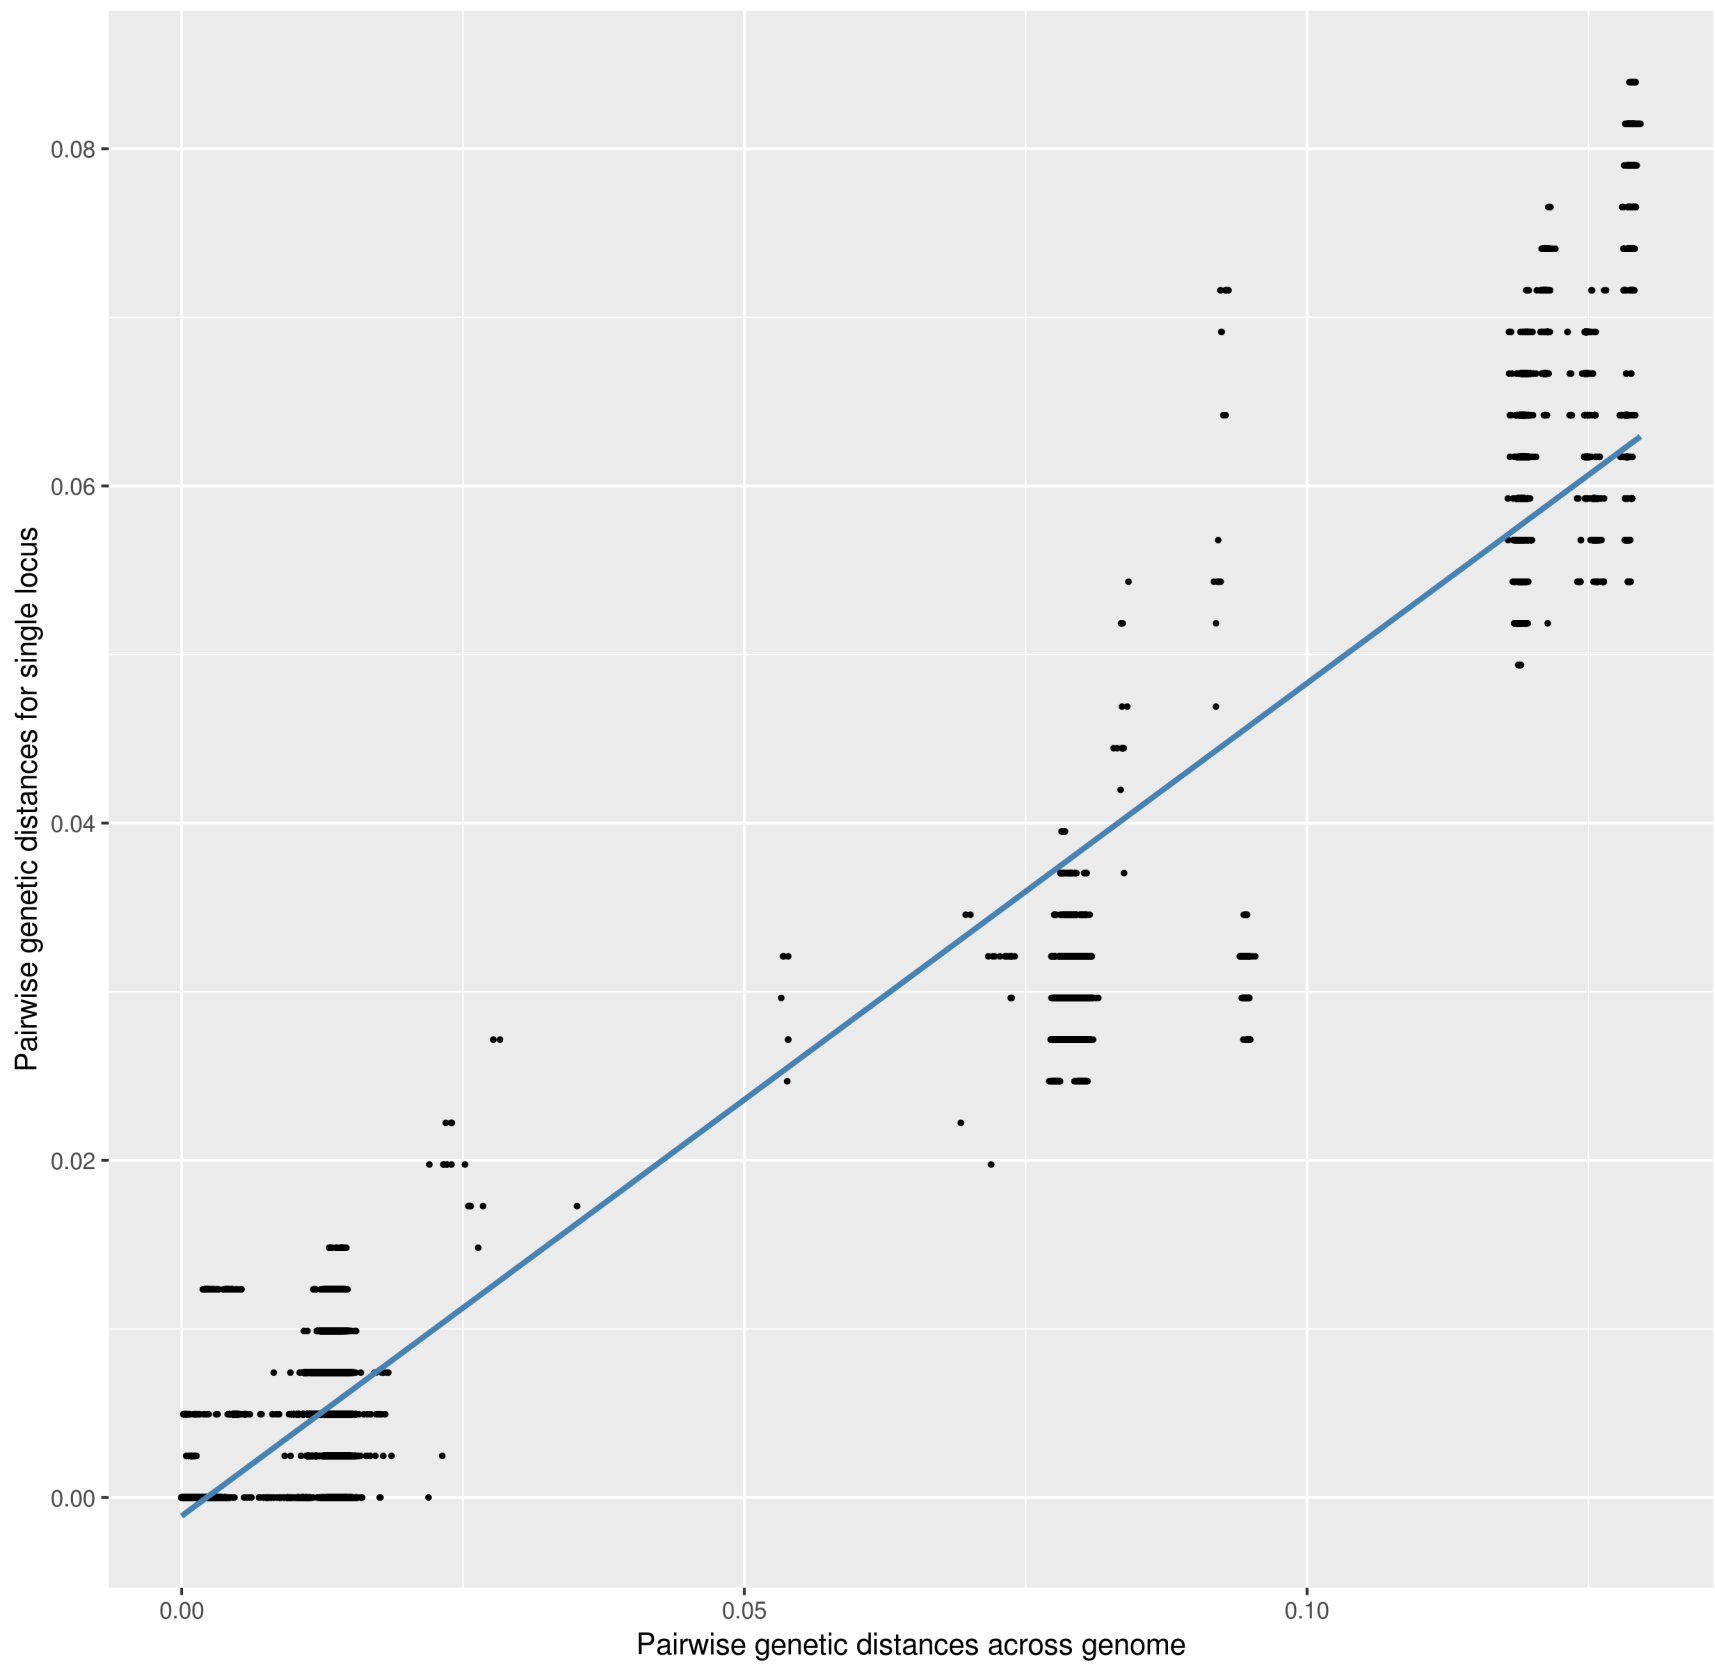

Pas\_cpn60P\_low\_distance  $y = 0.43x - 0.00043$   $R^2=0.532814195255429$

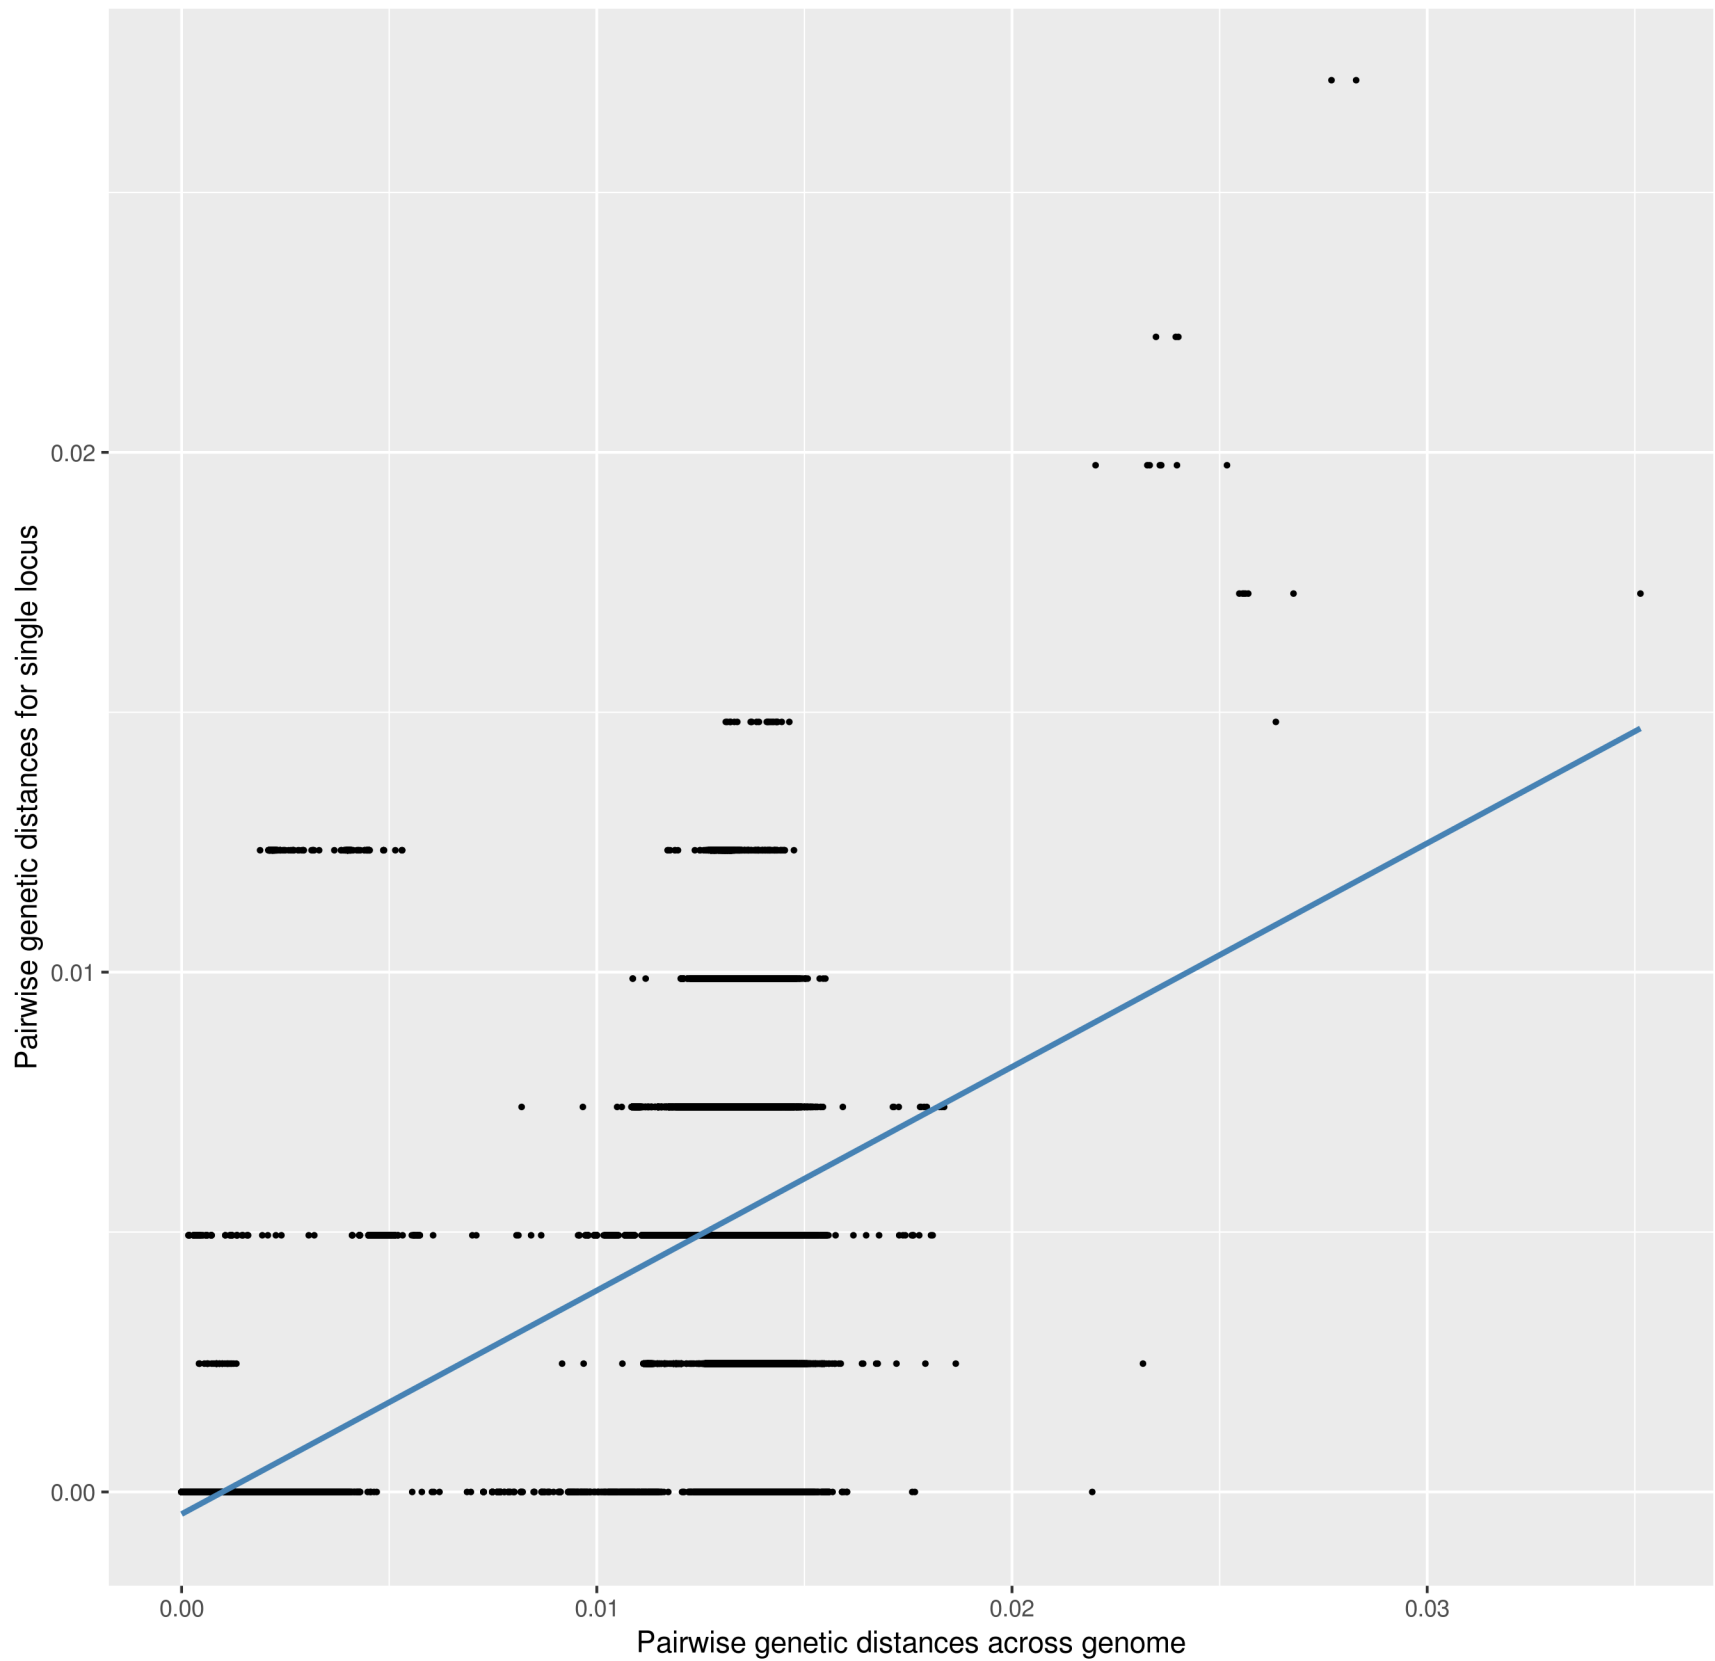



Pas\_cpn60P\_high\_distance  $y = 1x - 0.059$   $R^2=0.284905379640045$

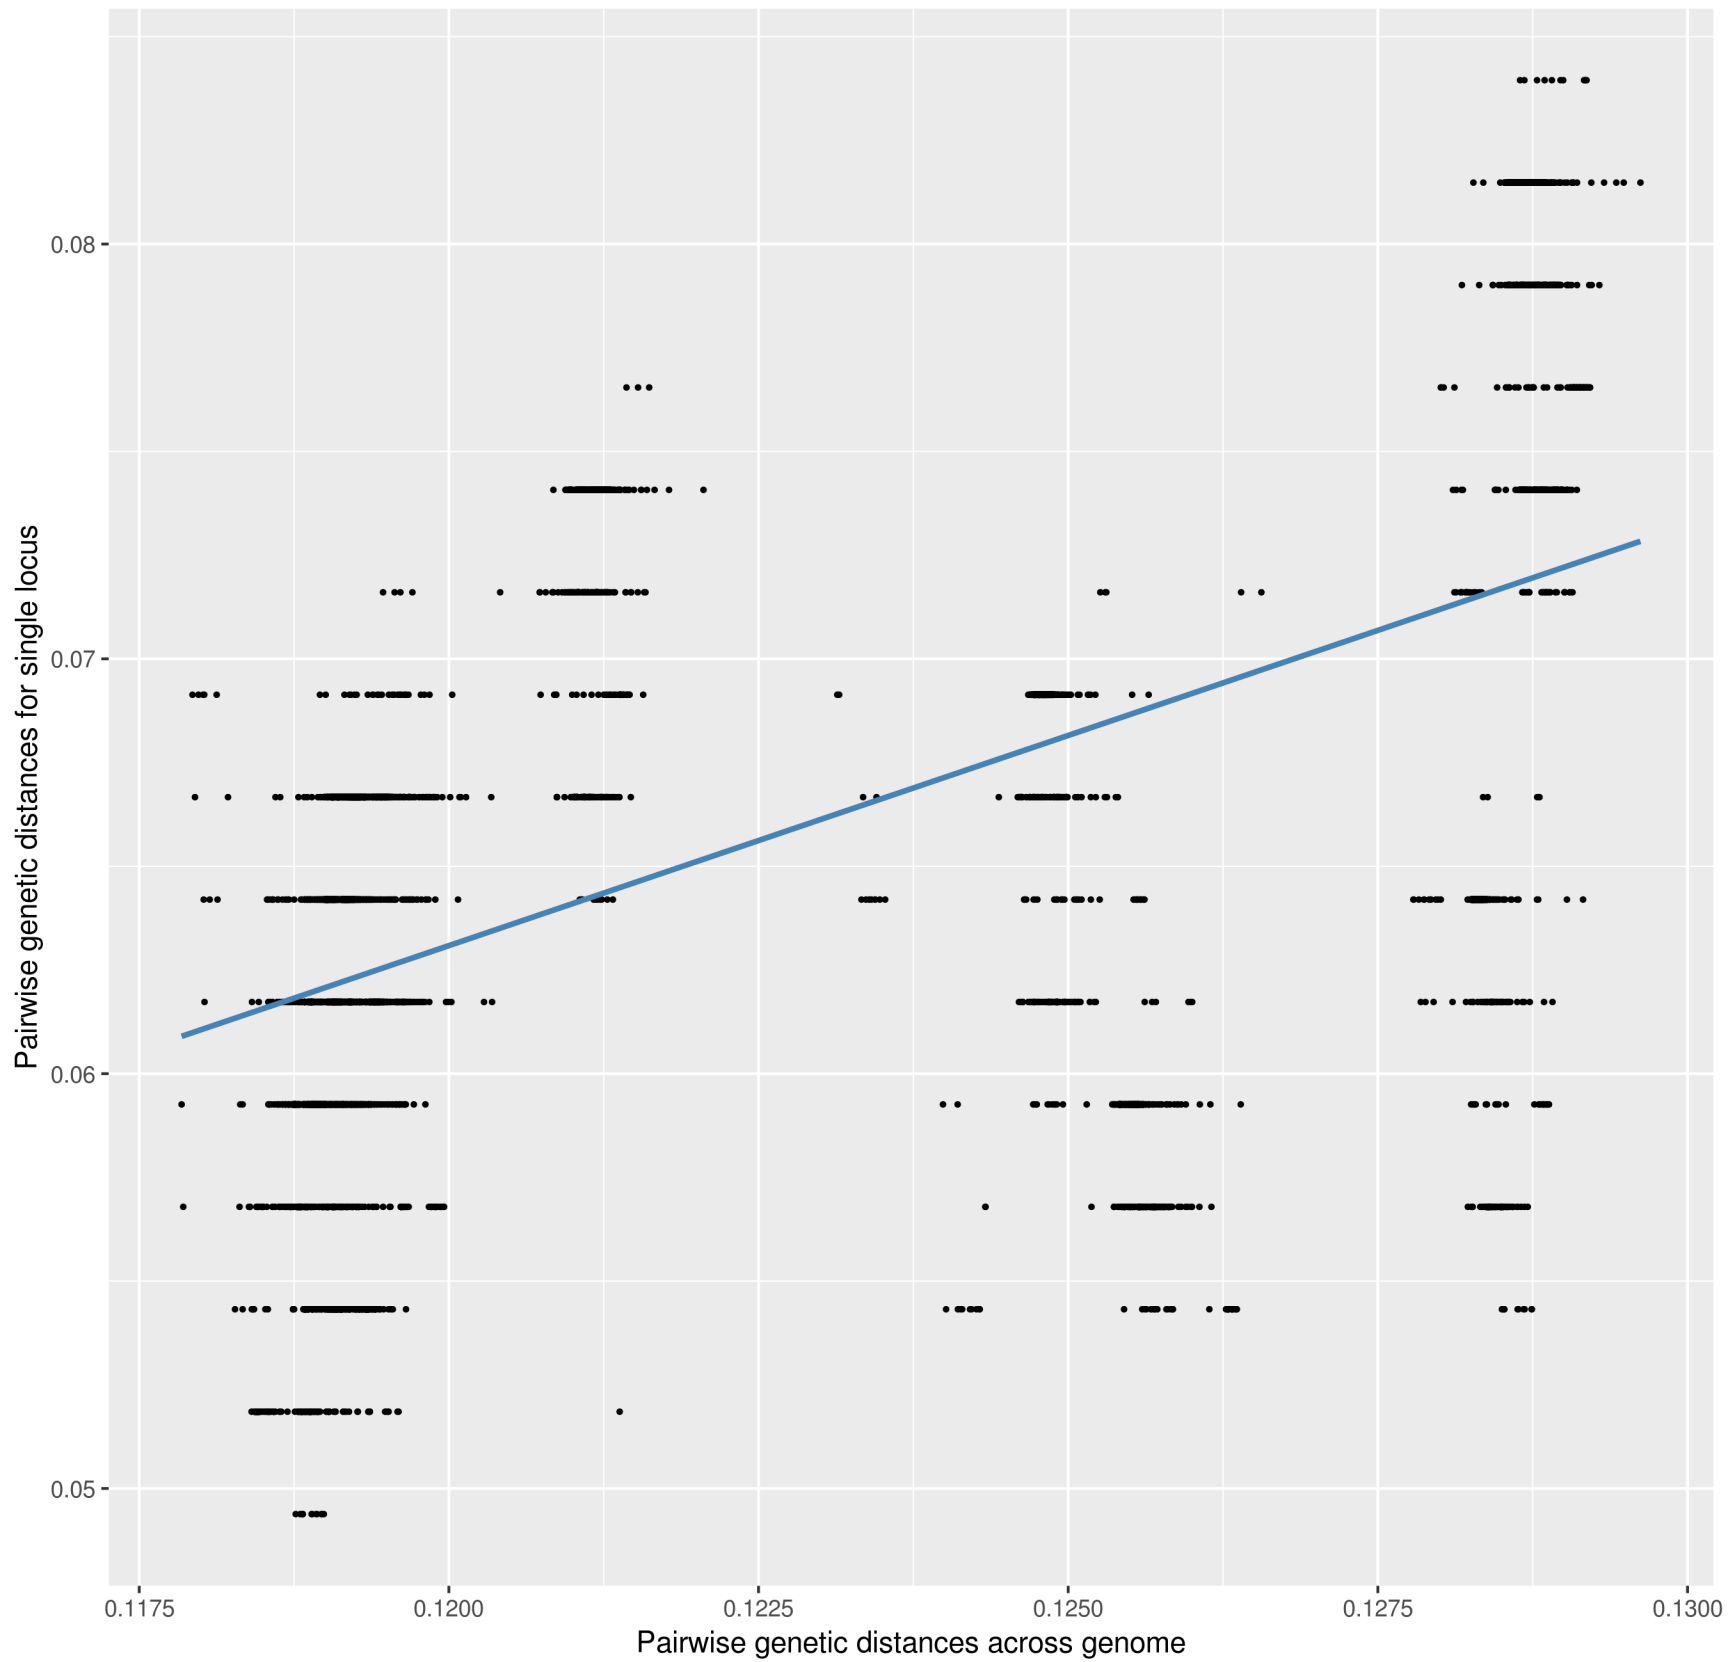



Pas\_fusA  $y = 0.67x - 0.0046$   $R^2=0.84478333237464$

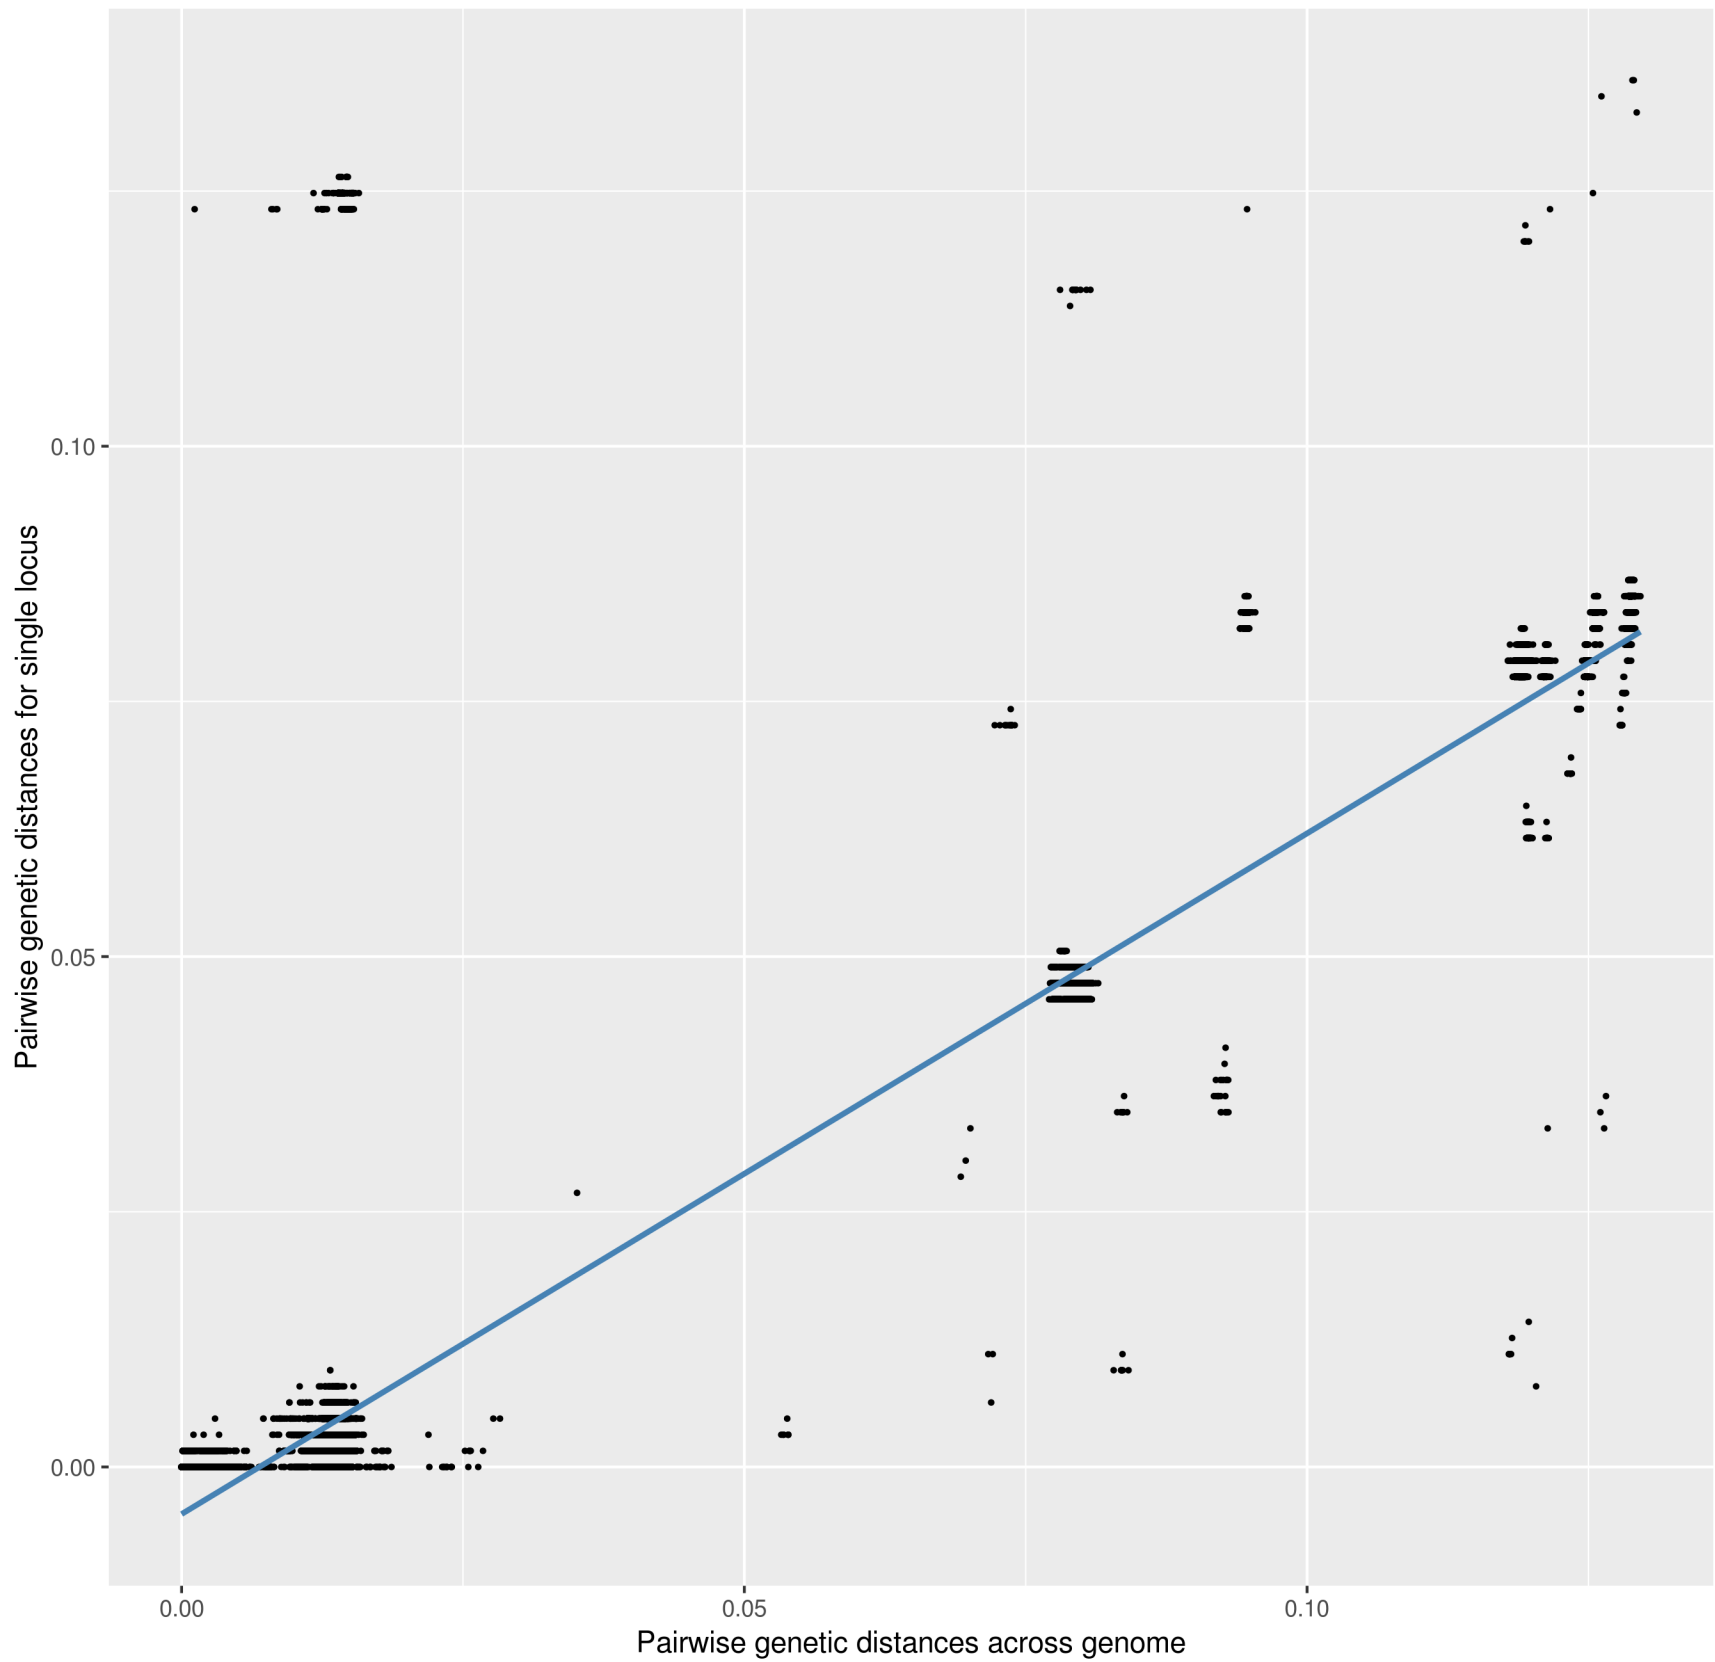

Pas\_fusA\_low\_distance  $y = 0.16x - 0.00029$   $R^2=0.0203595234832739$

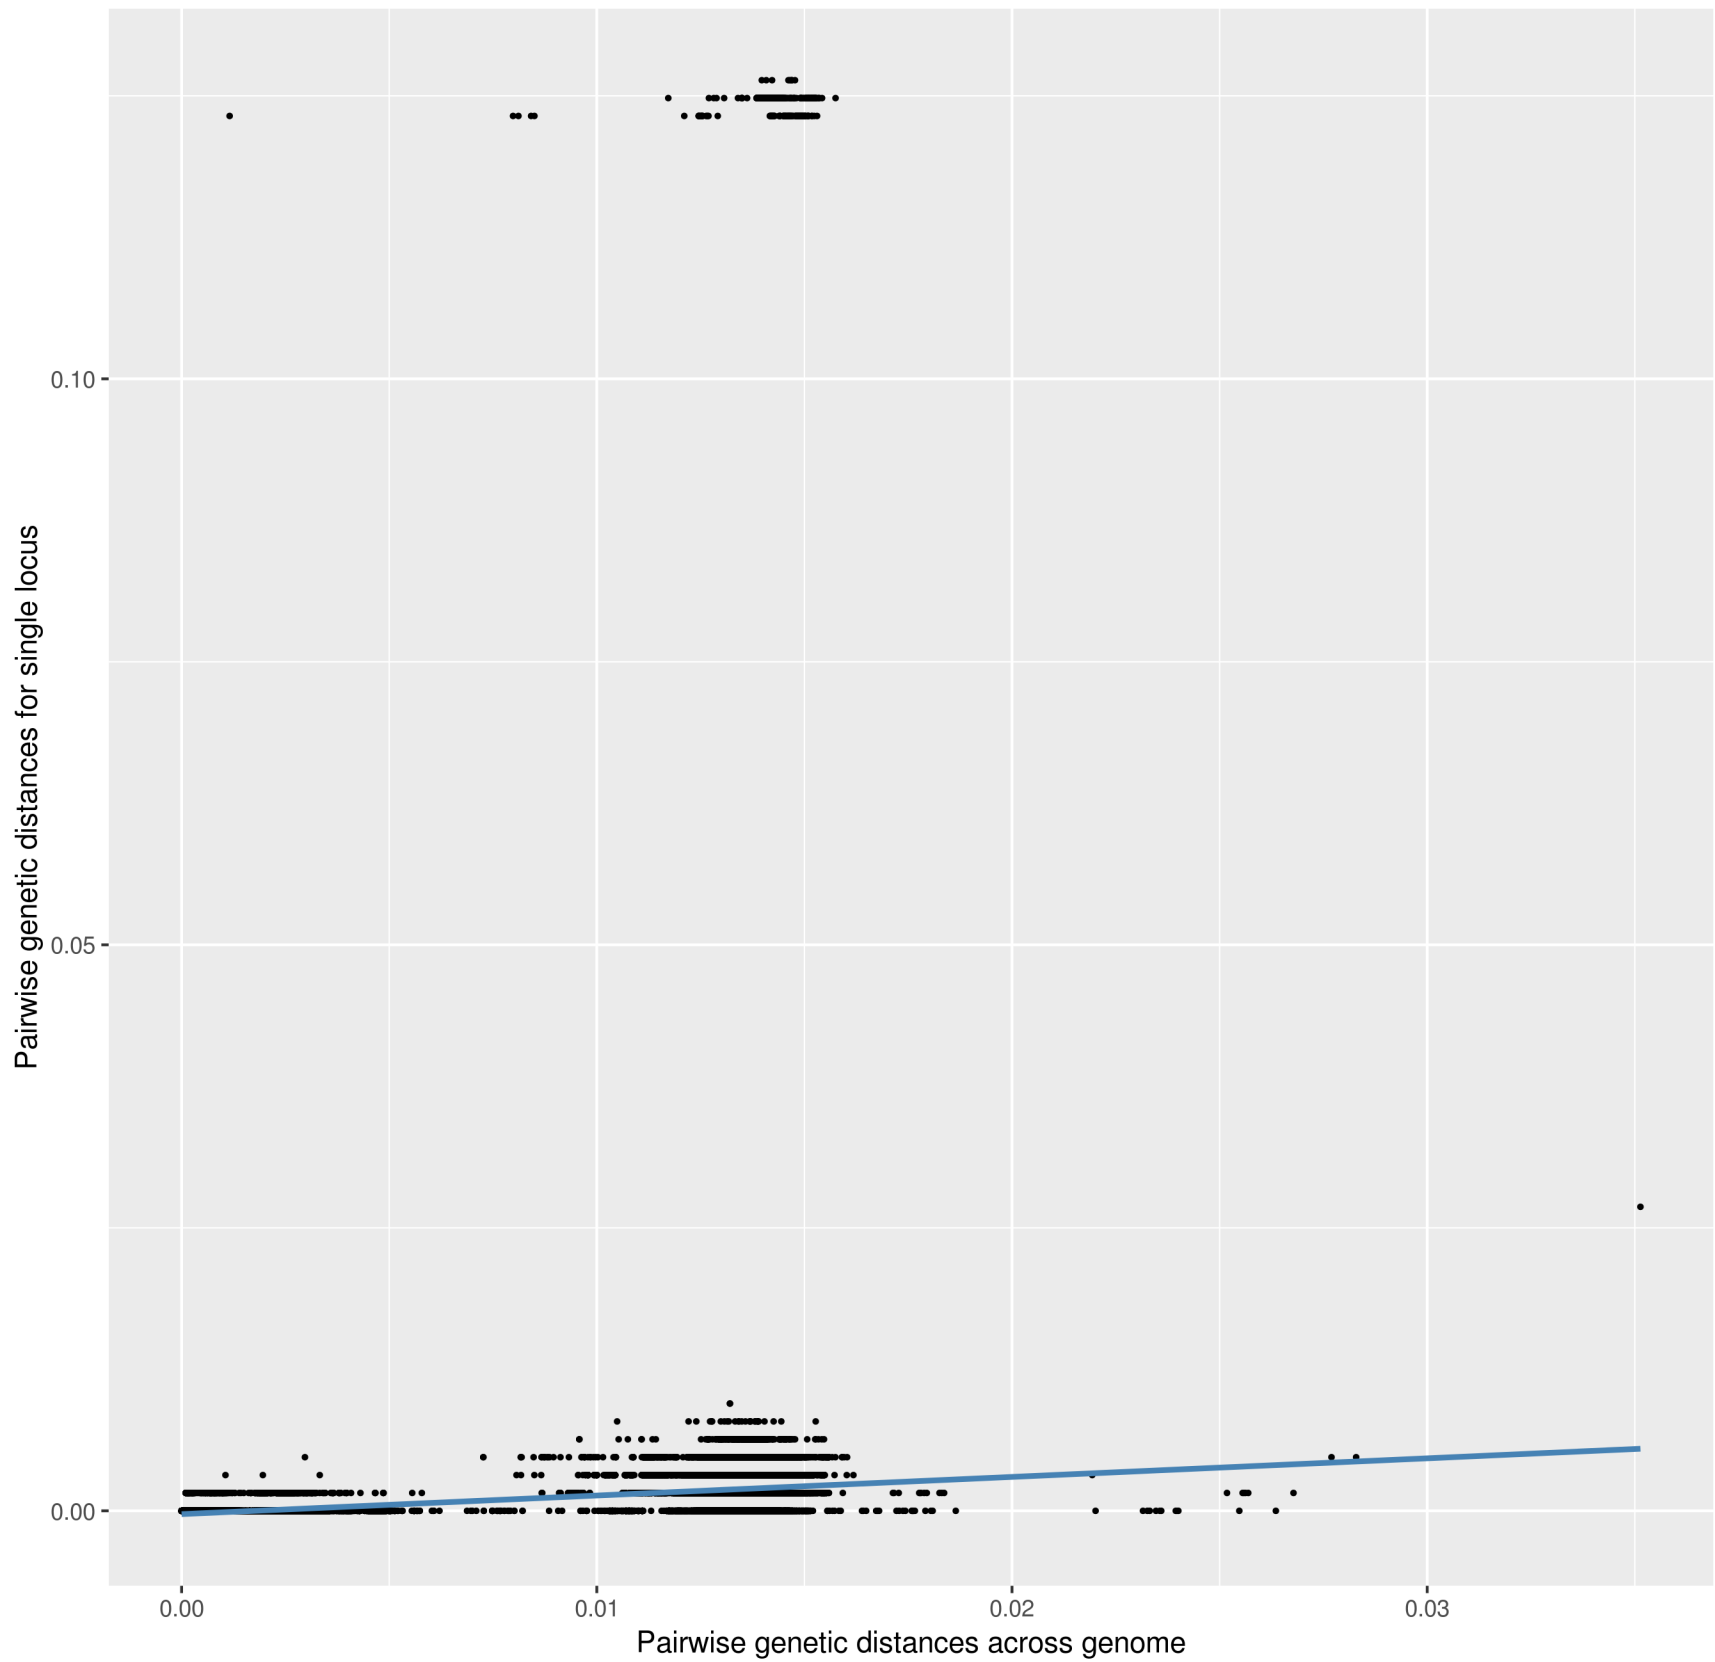

Pas\_fusA\_mid\_distance  $y = 2.2x - 0.12$   $R^2=0.819224299698743$

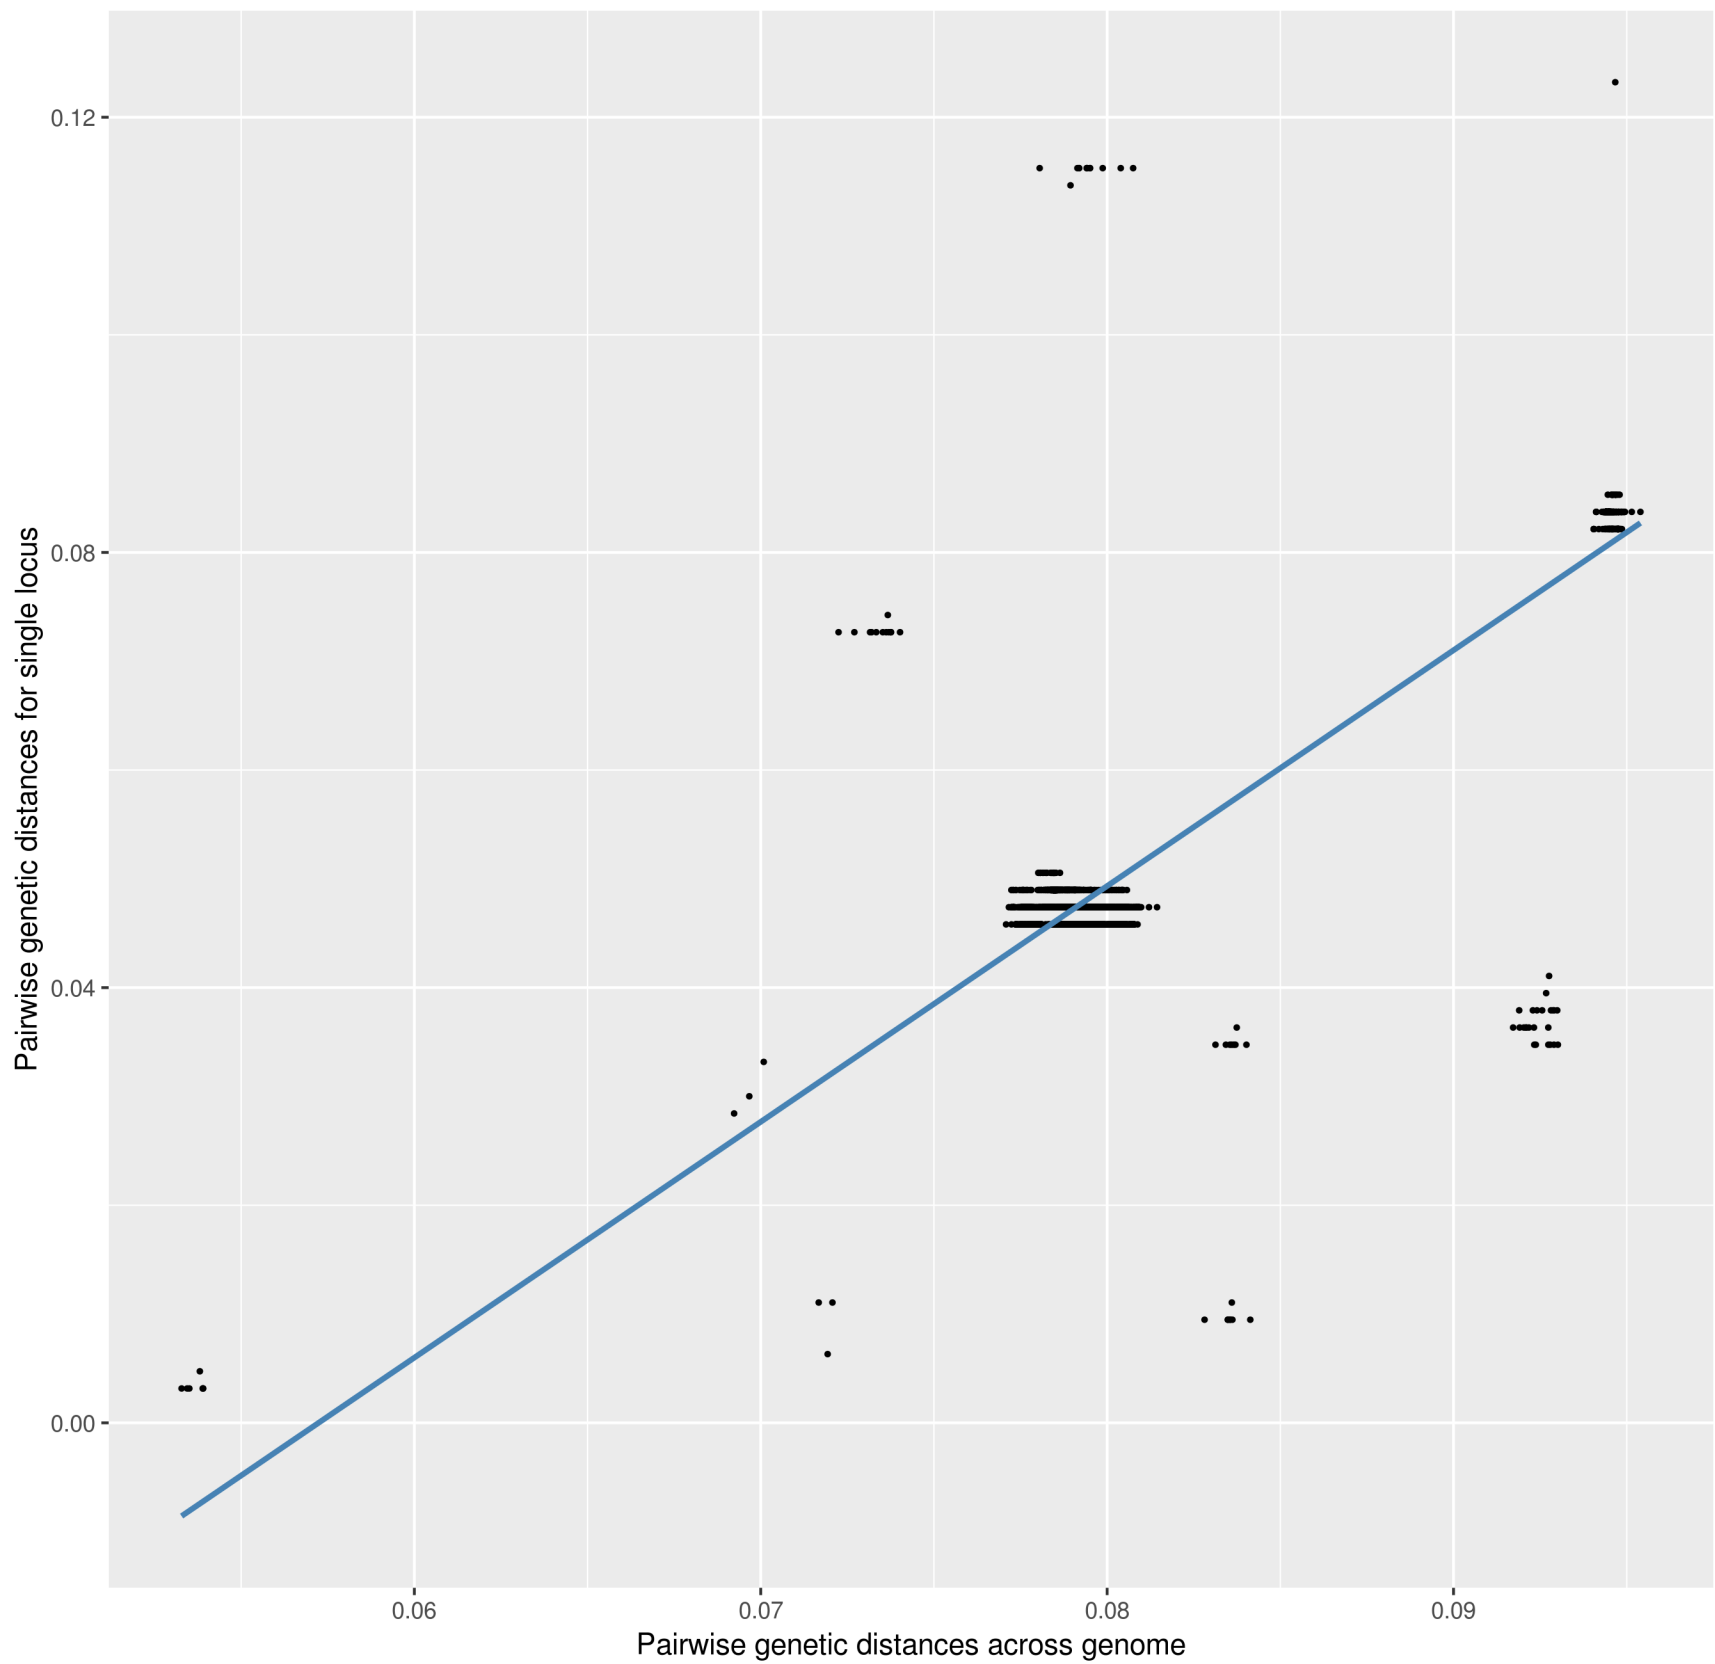

Pas\_fusA\_high\_distance  $y = 0.55x + 0.013$   $R^2=0.256046776877068$

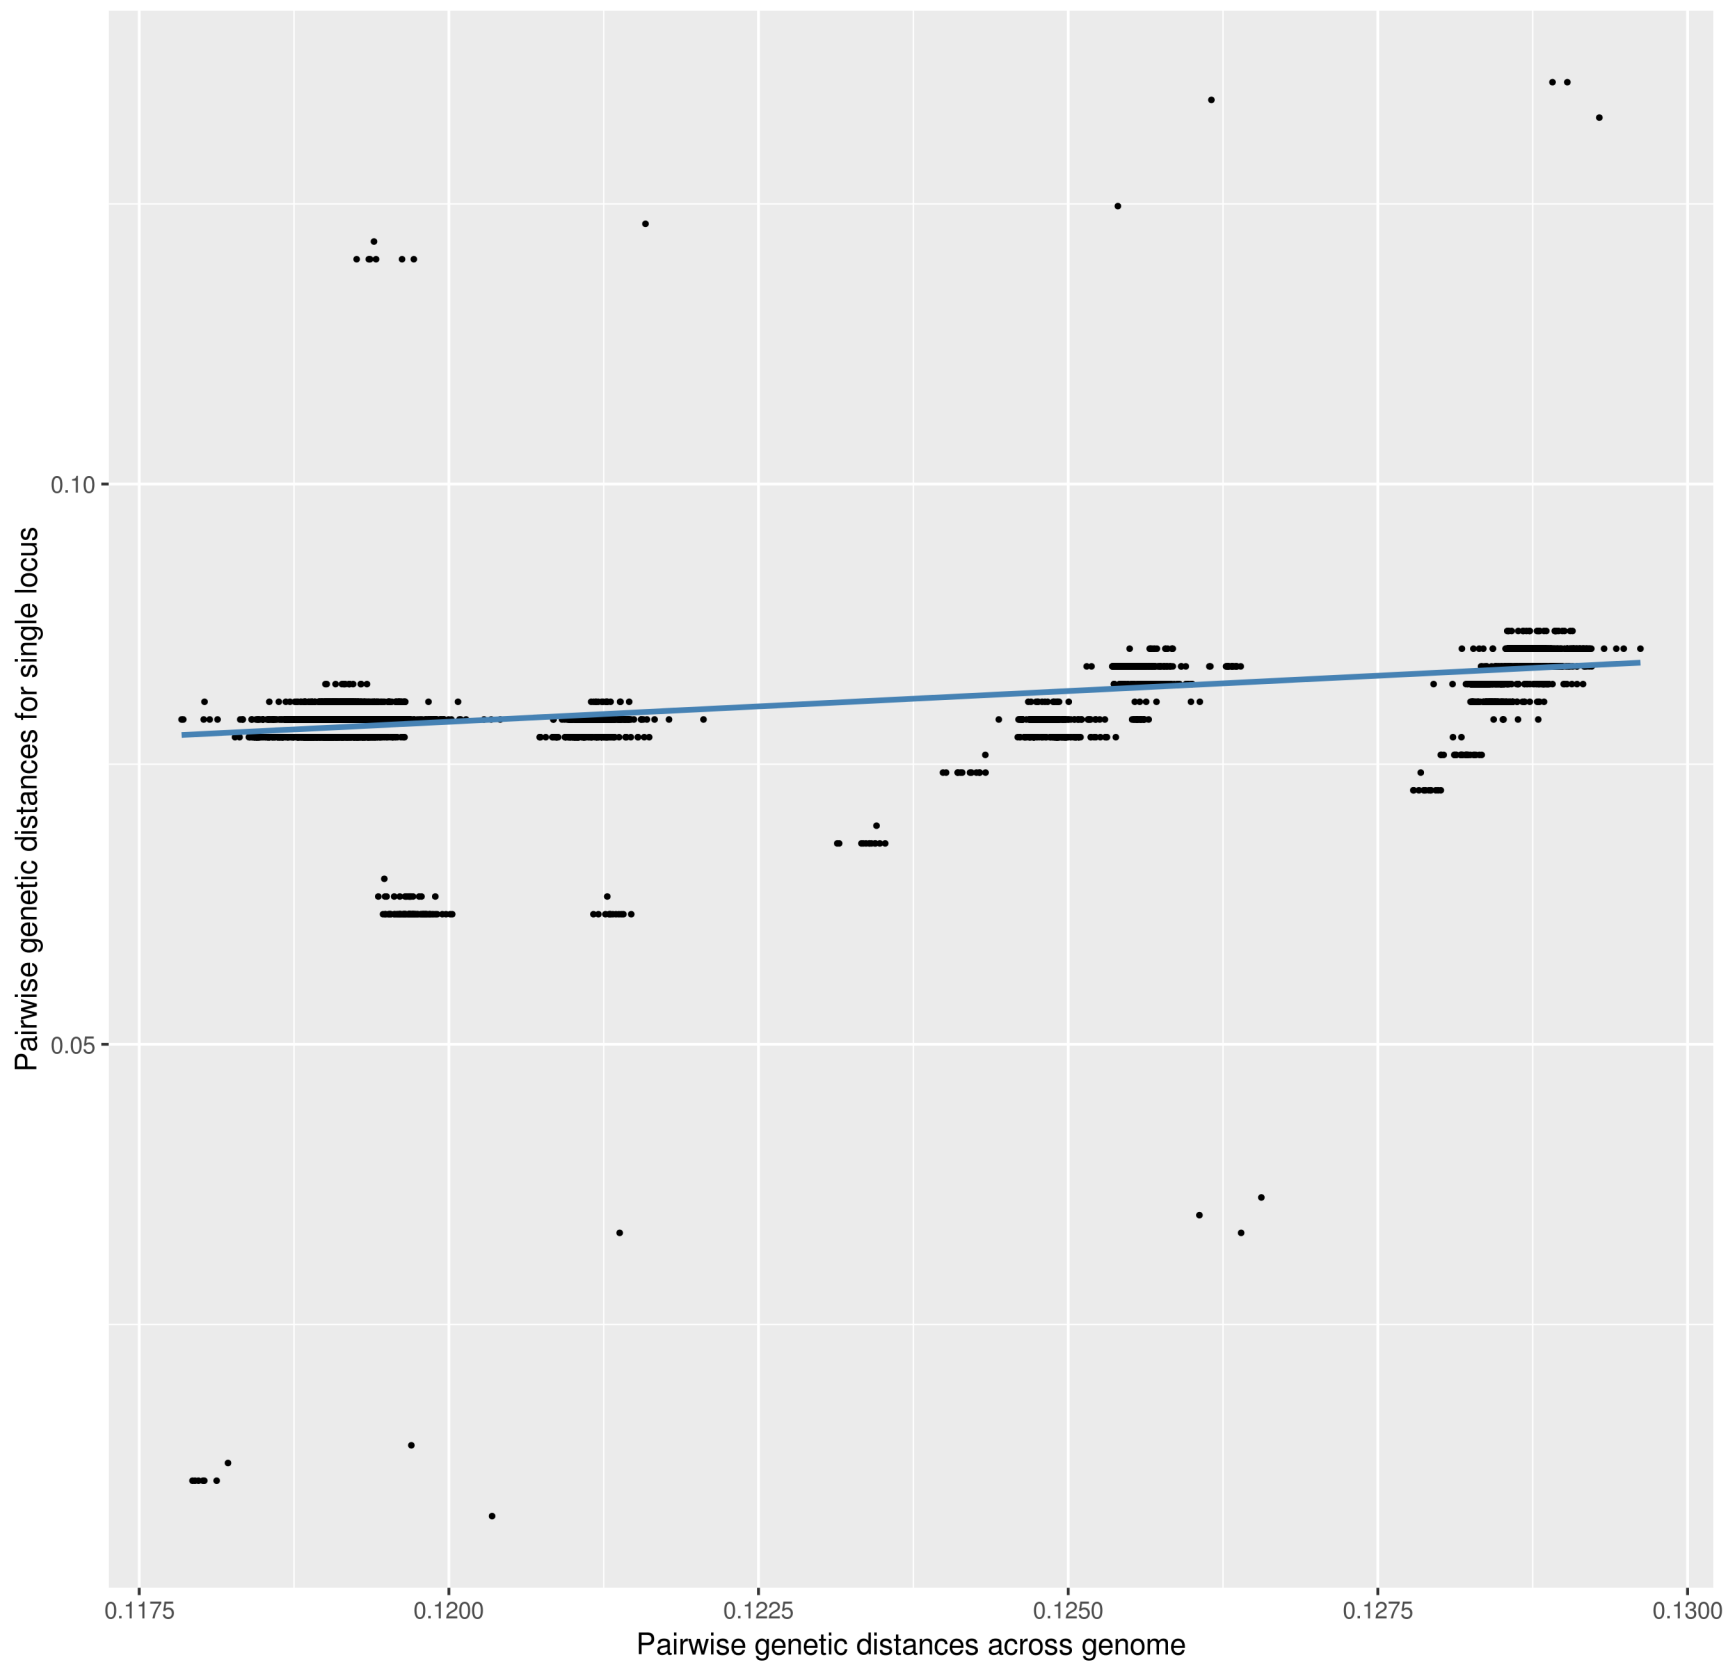

Pas\_gltA  $y = 0.58x - 0.0041$   $R^2=0.844089244117204$

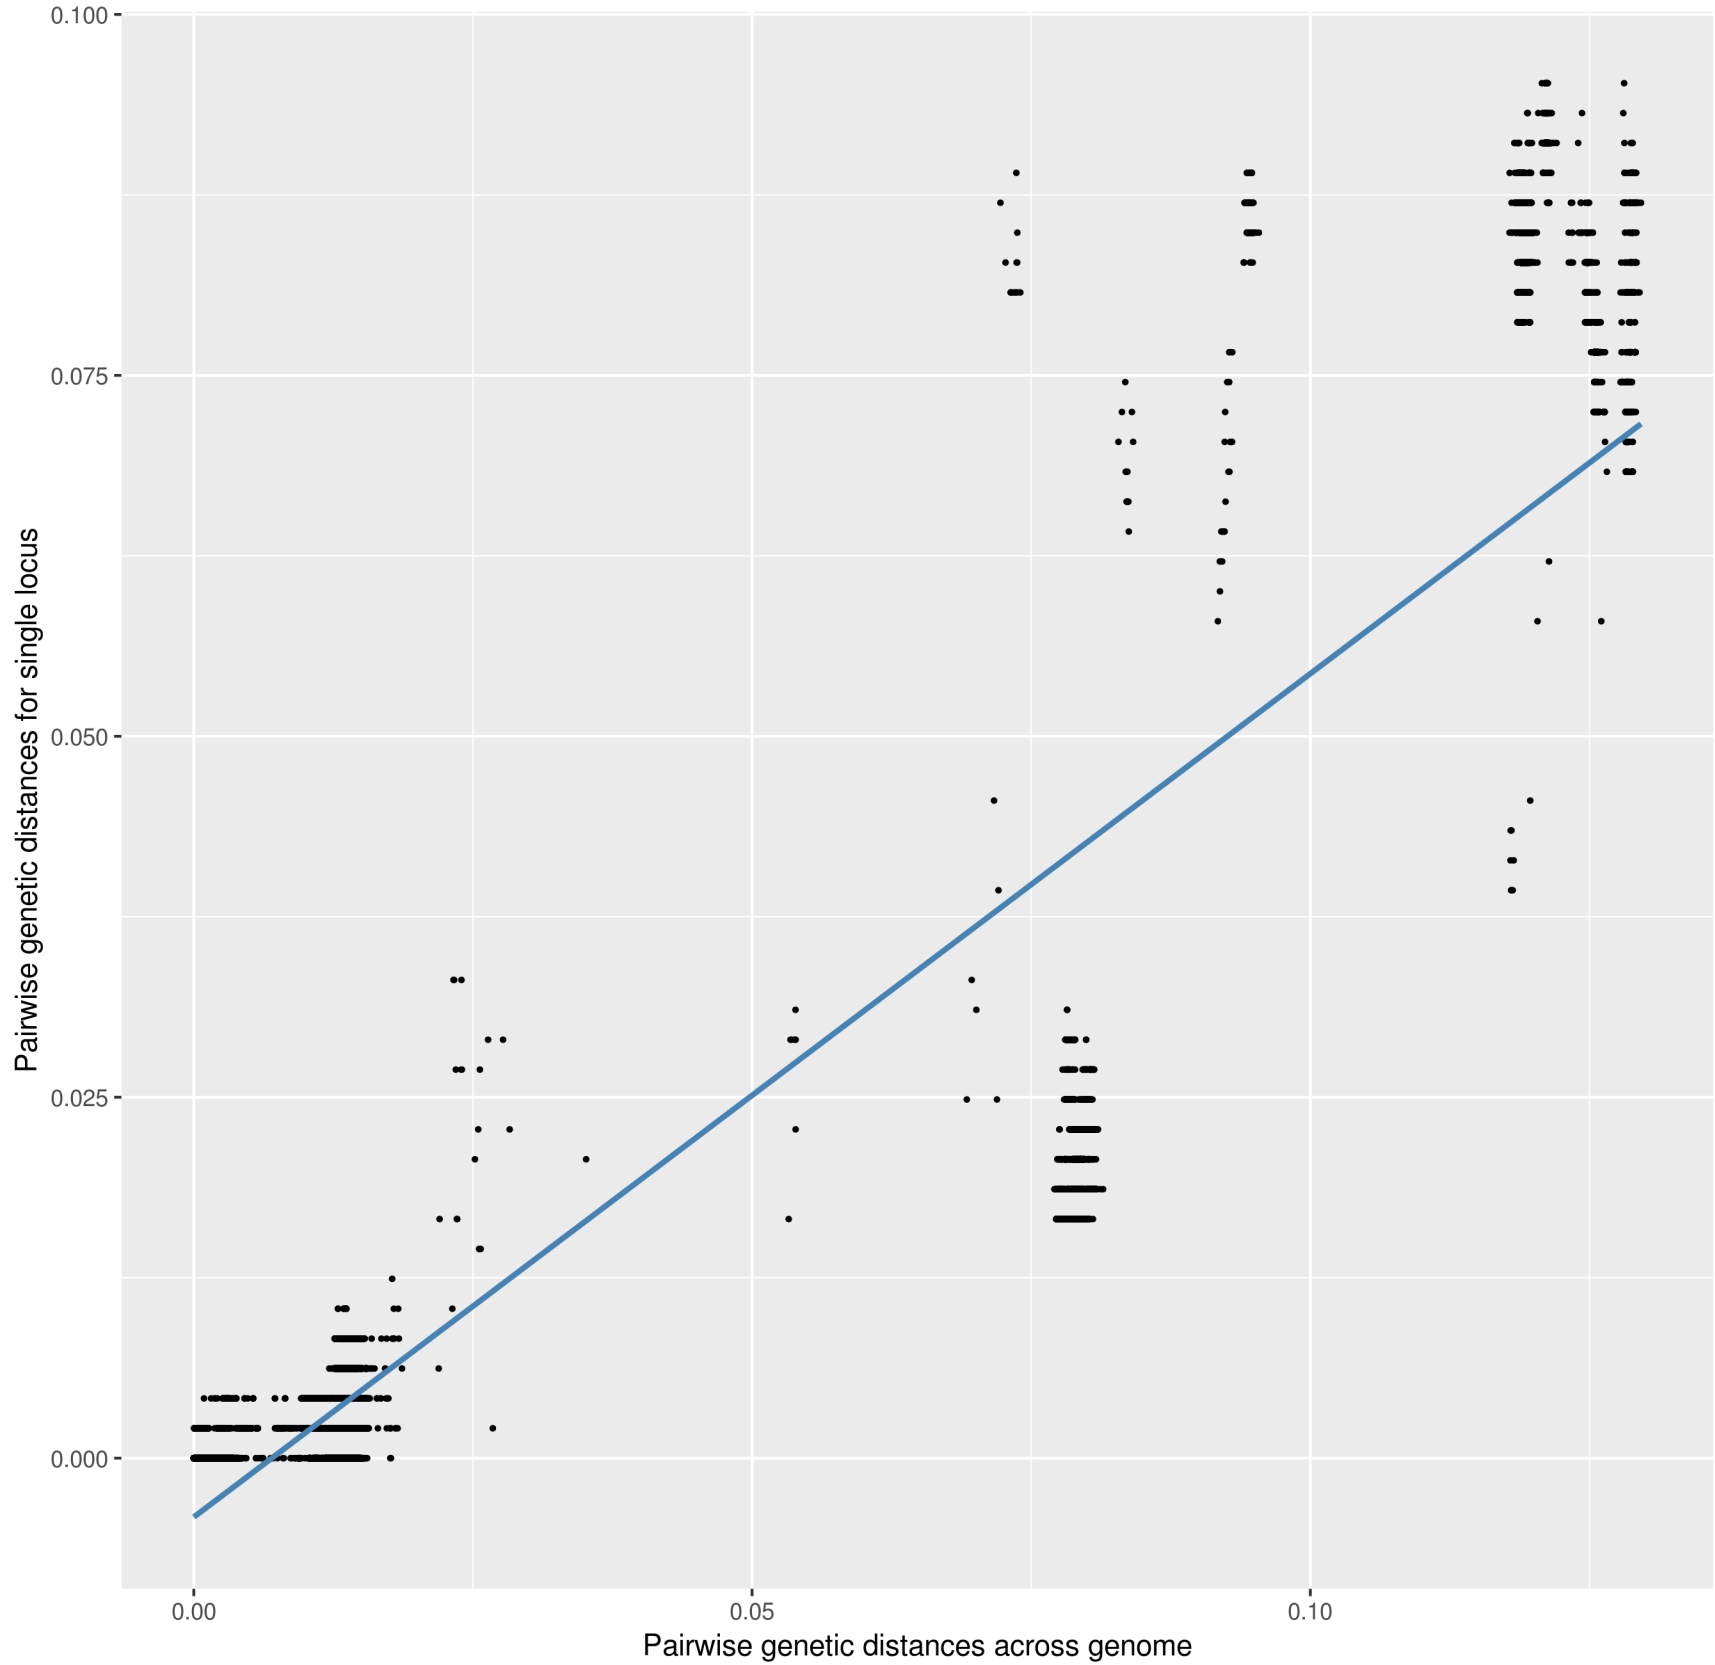

Pas\_gltA\_low\_distance  $y = 0.18x - 0.00026$   $R^2=0.272379143295791$

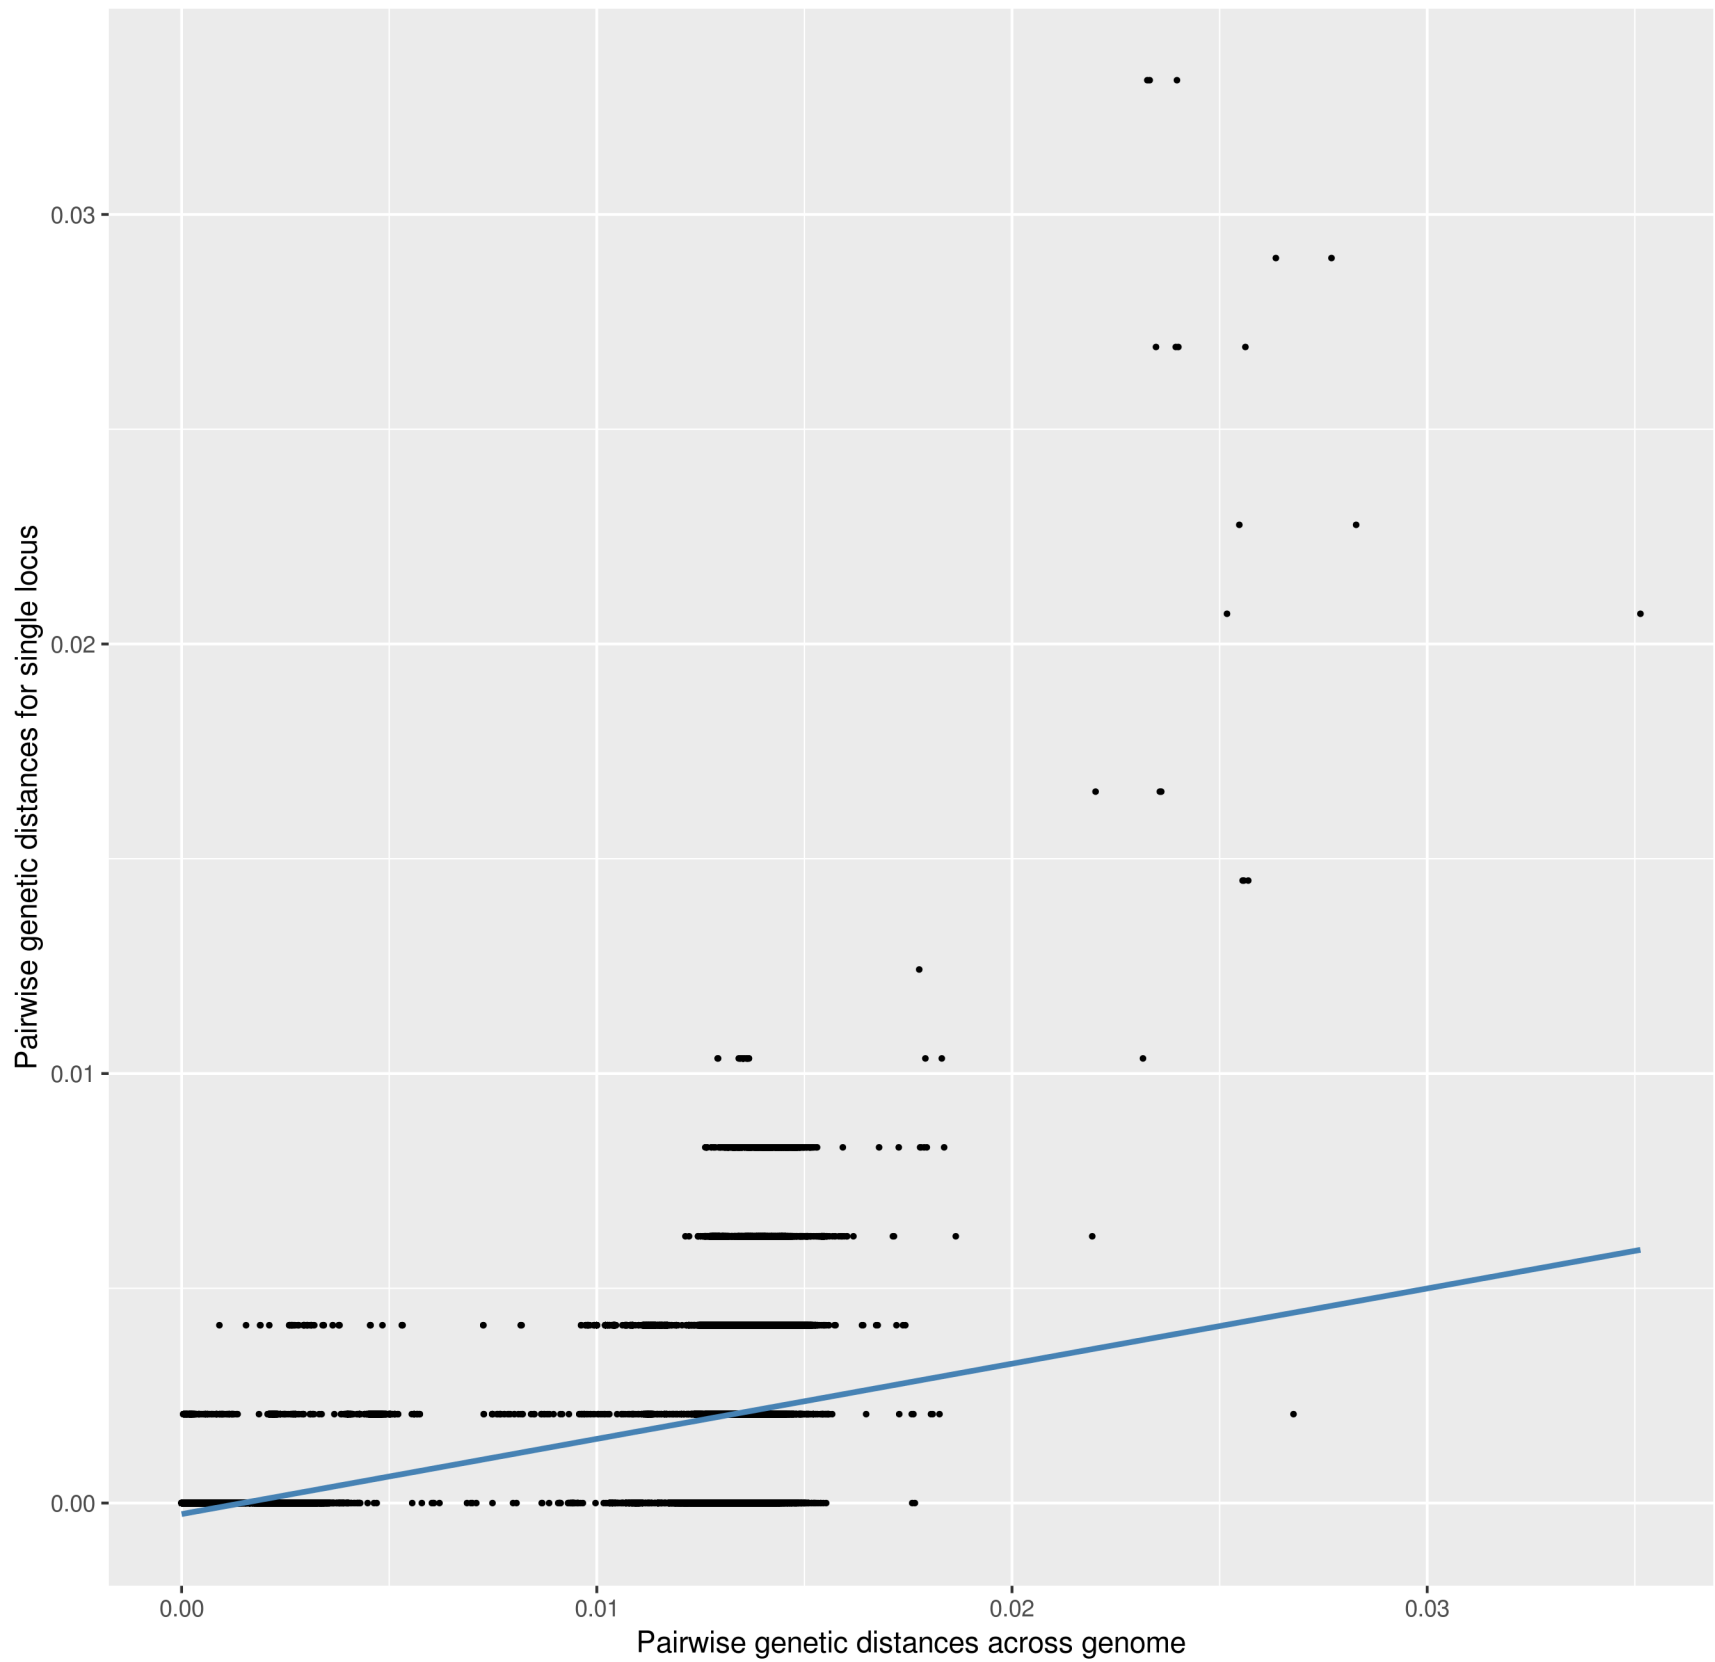

Pas\_gltA\_mid\_distance  $y = 4x - 0.3$   $R^2 = 0.884493037247485$

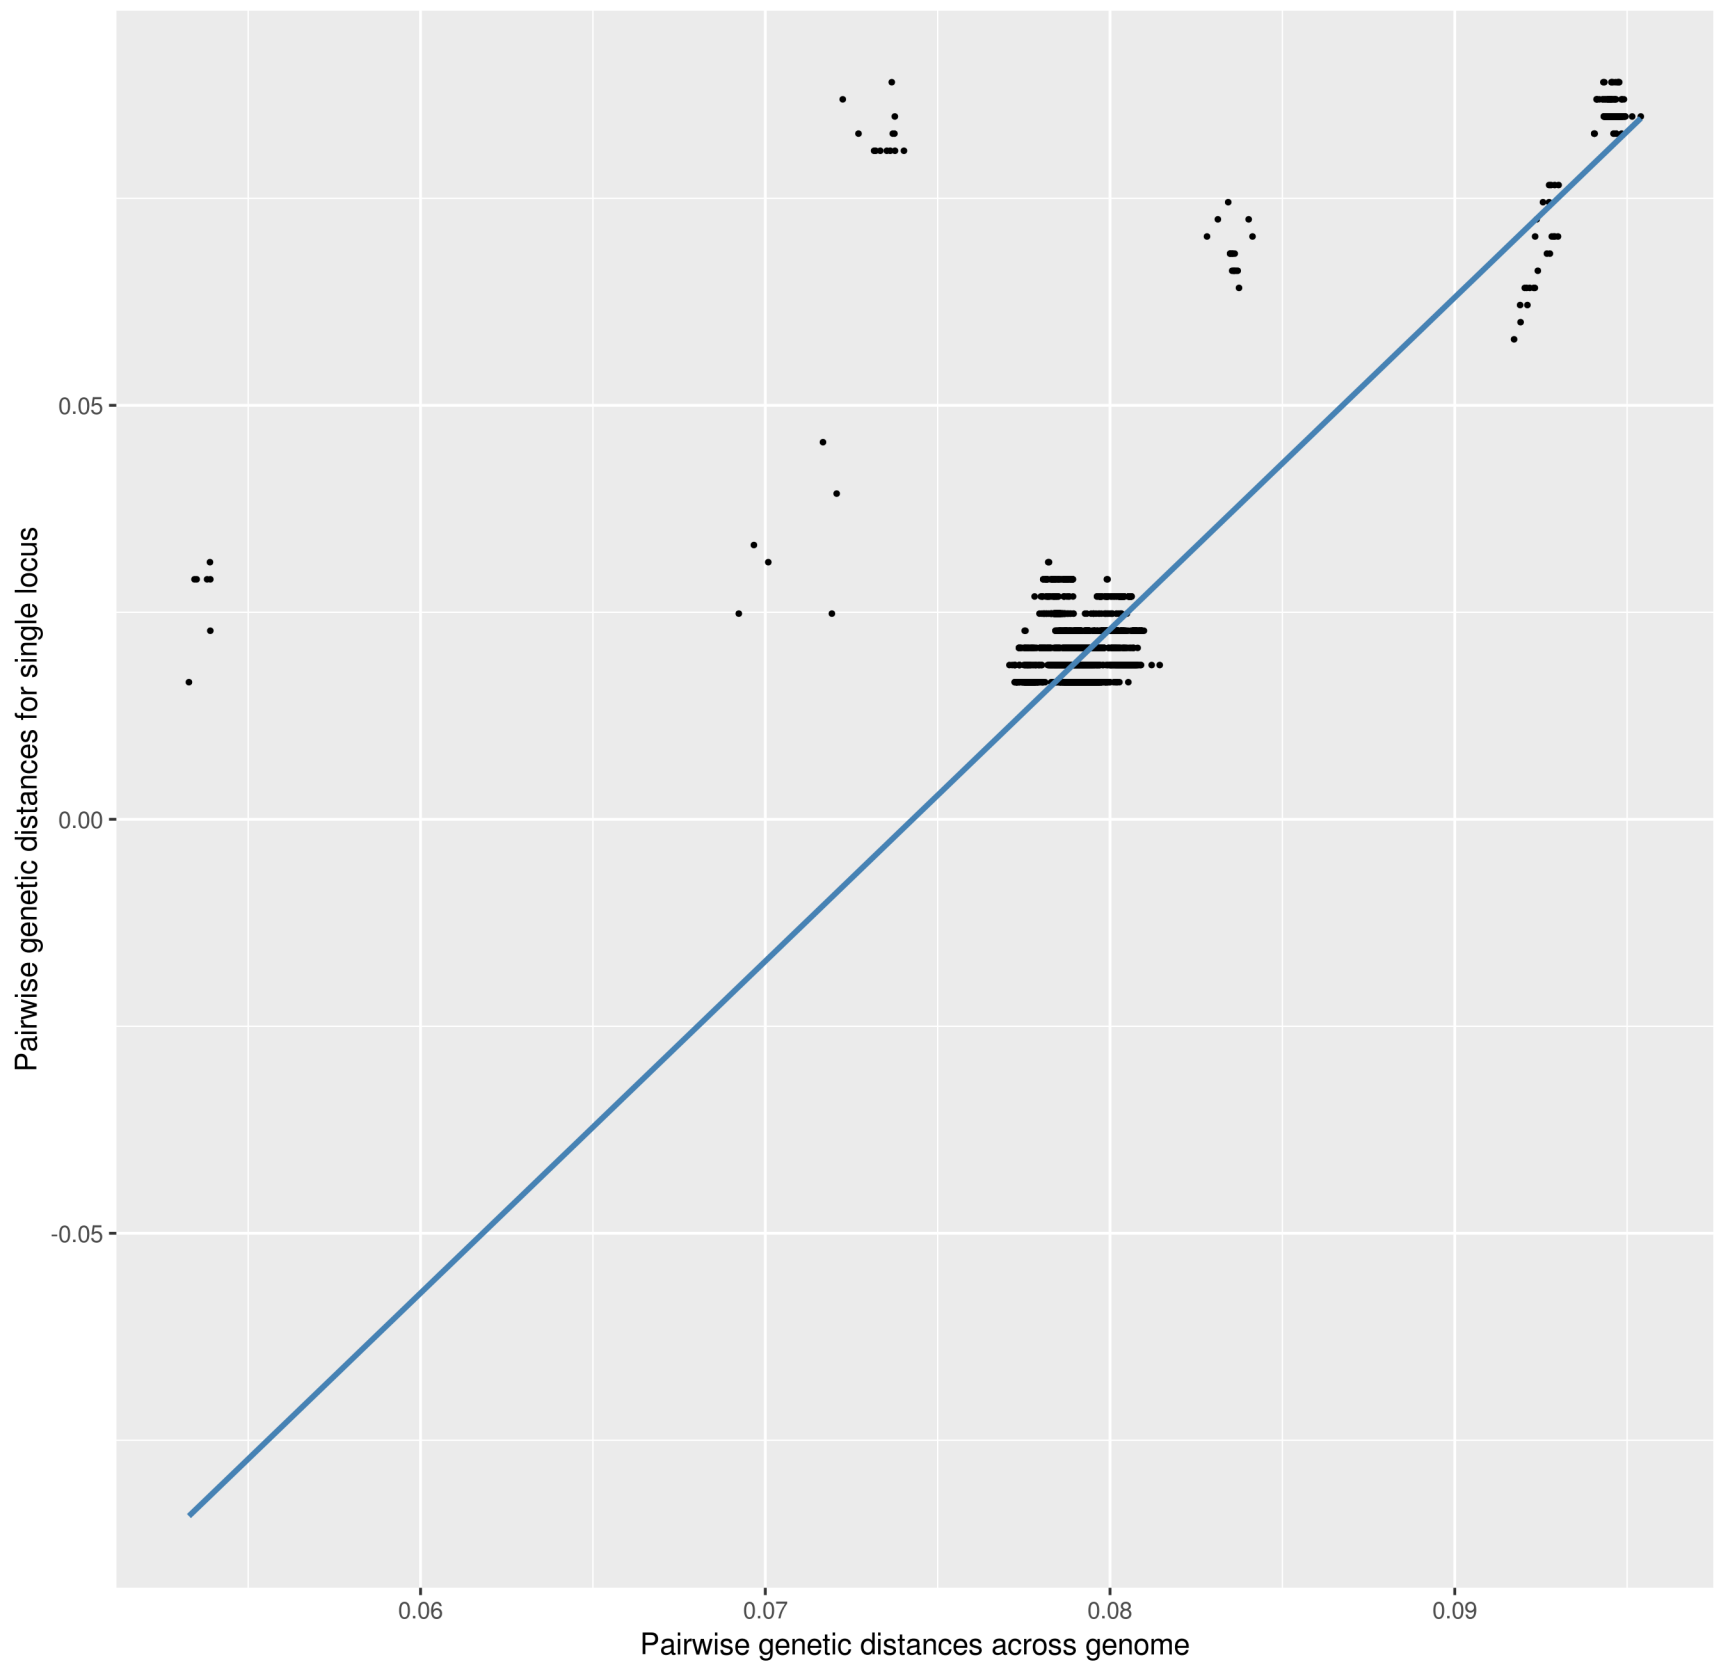

Pas\_gltA\_high\_distance  $y = -0.51x + 0.15$   $R^2=0.181585720867673$

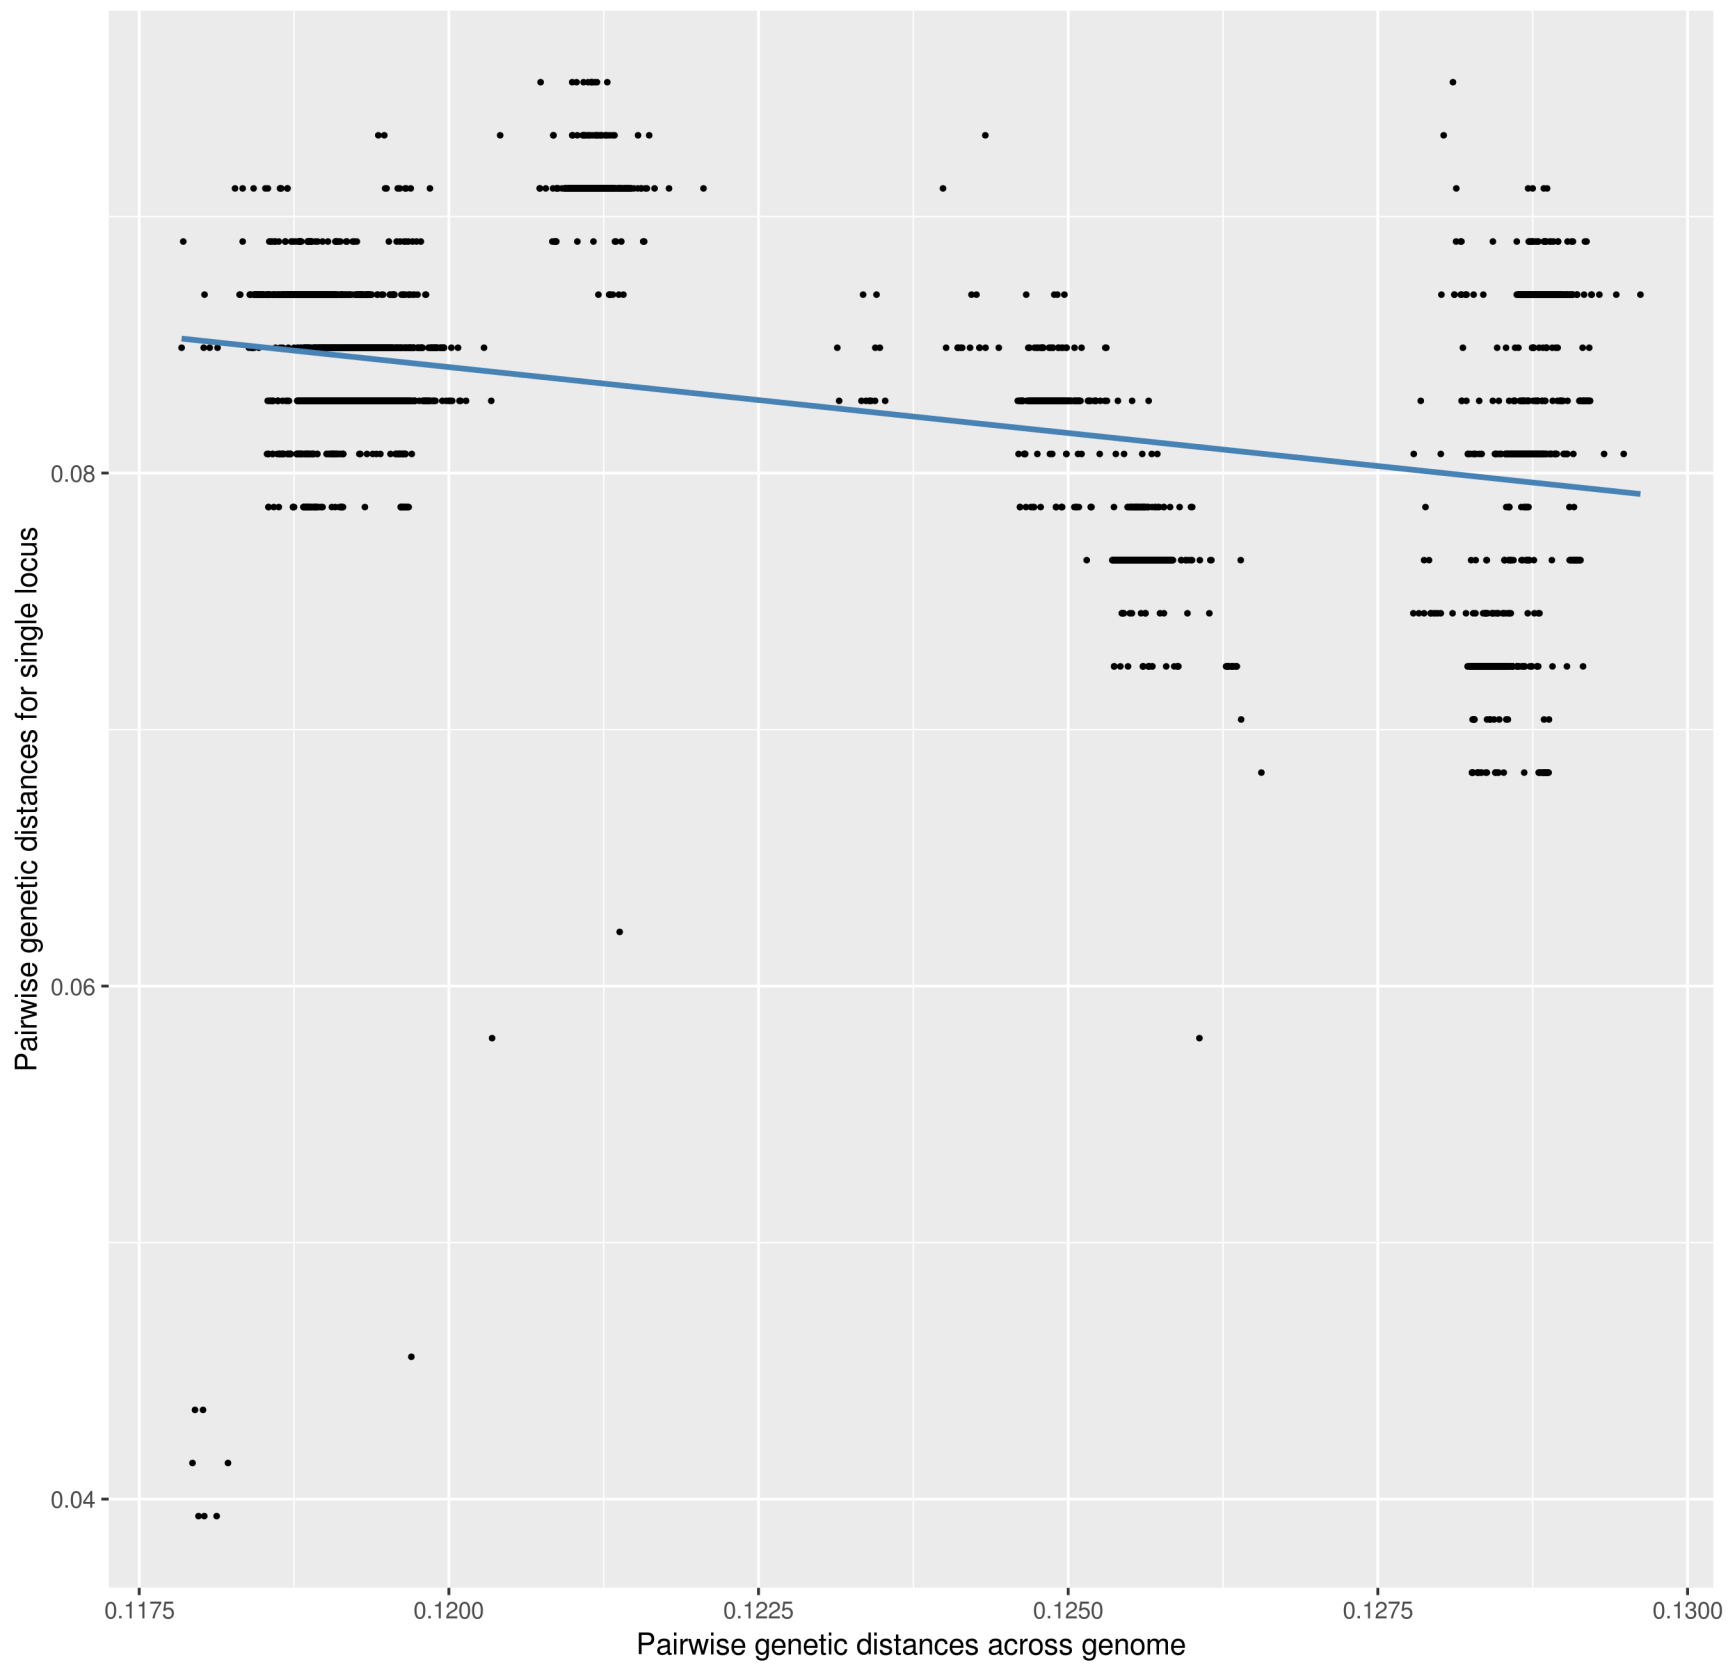



Pas\_pyrG  $y = 0.71x - 0.0053$   $R^2=0.867302047207409$

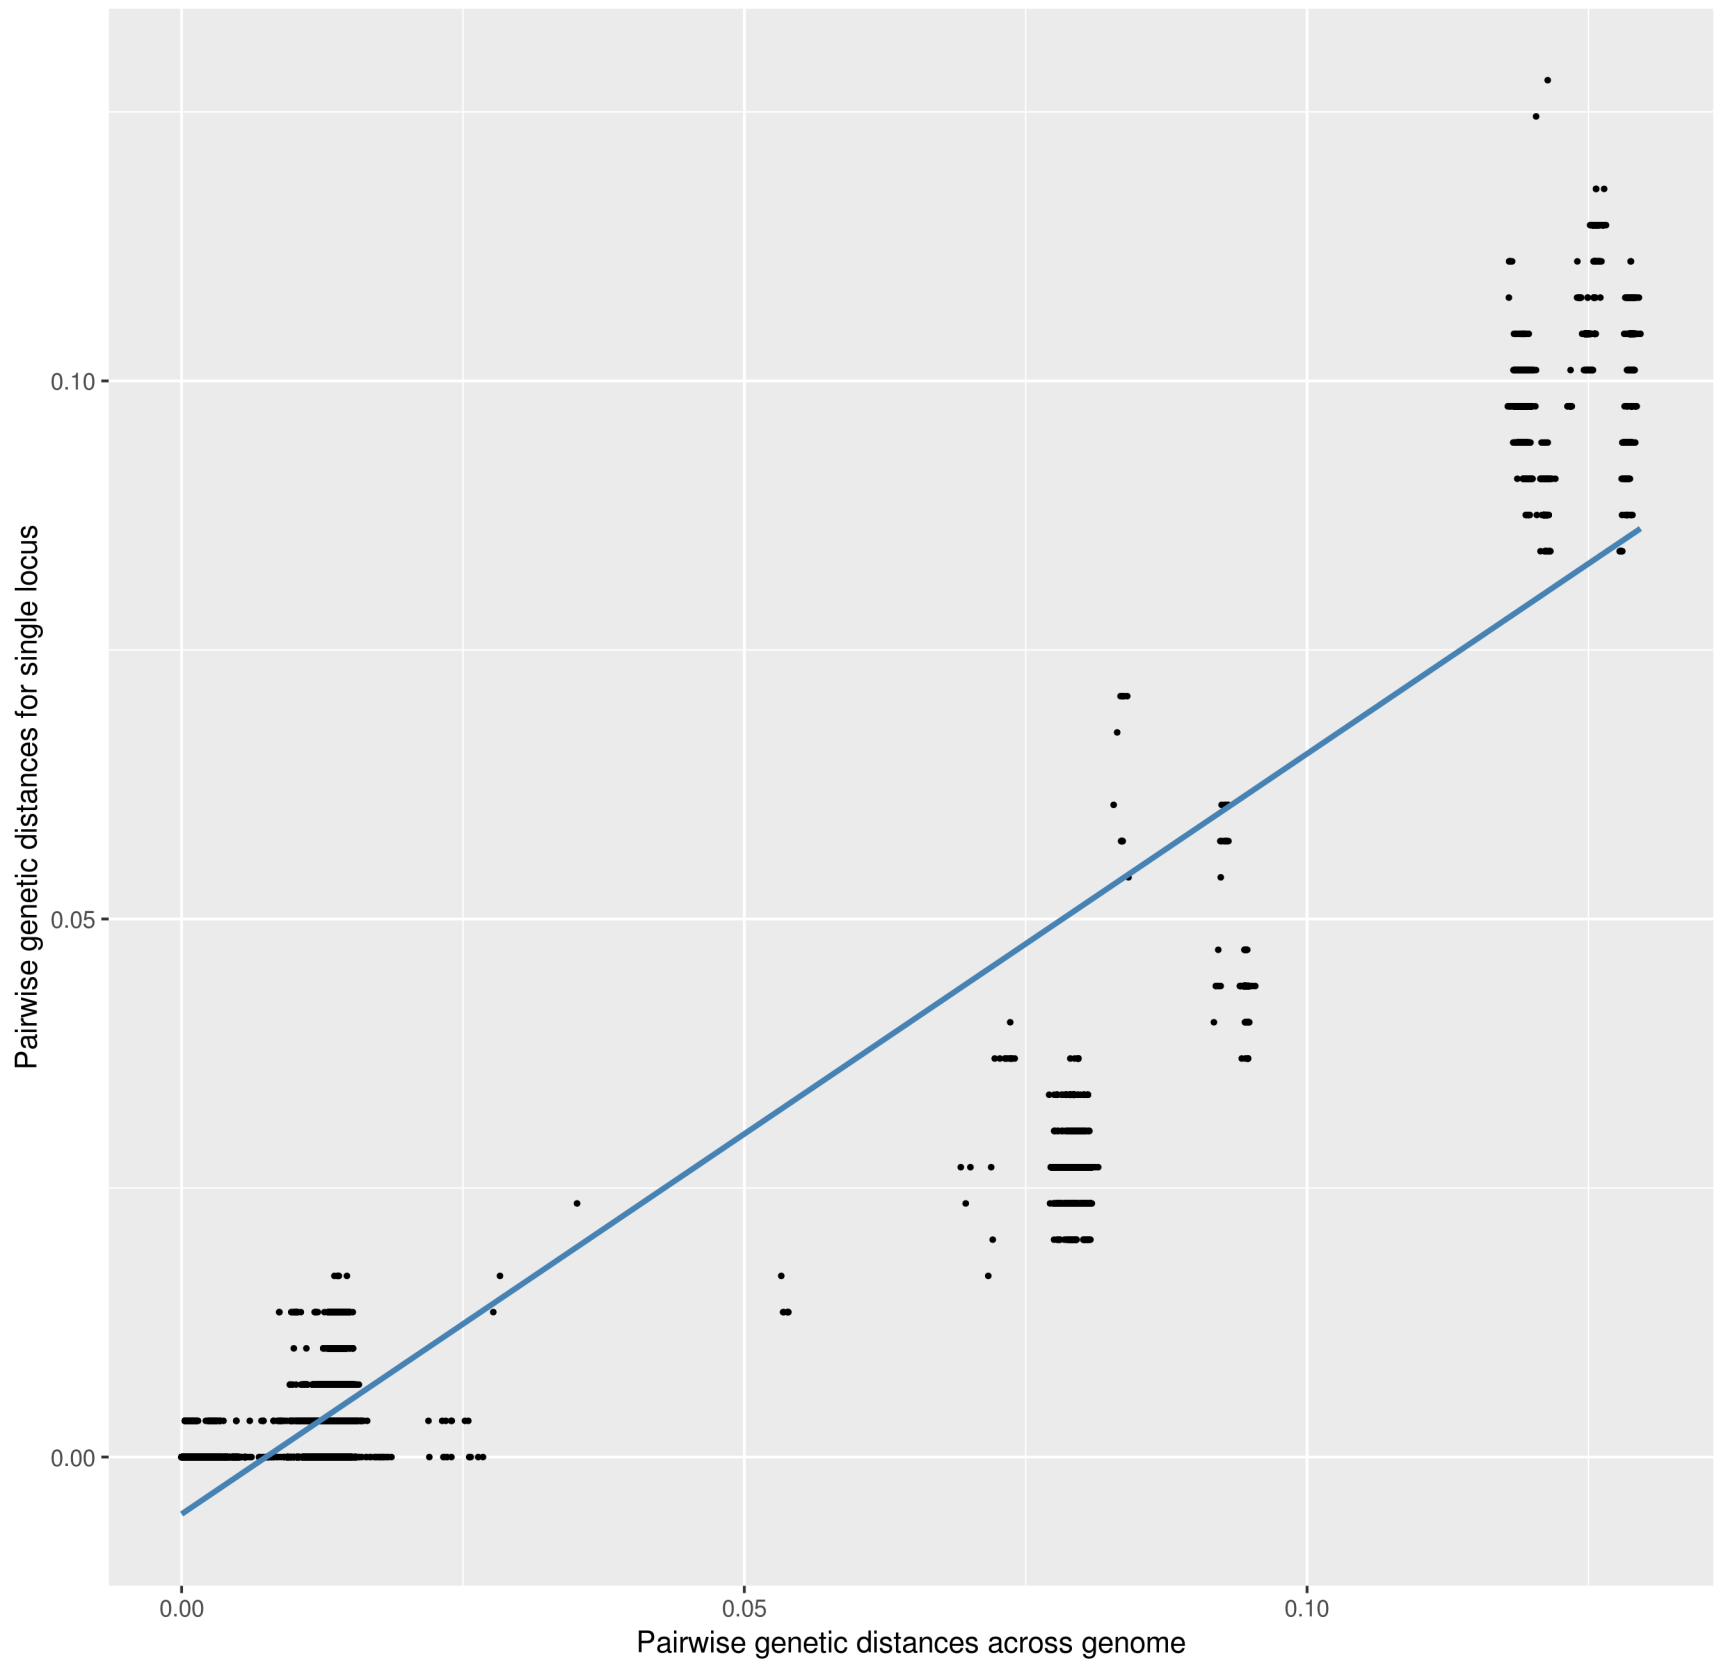

Pas\_pyrG\_low\_distance  $y = 0.16x - 0.00027$   $R^2=0.179526976539296$

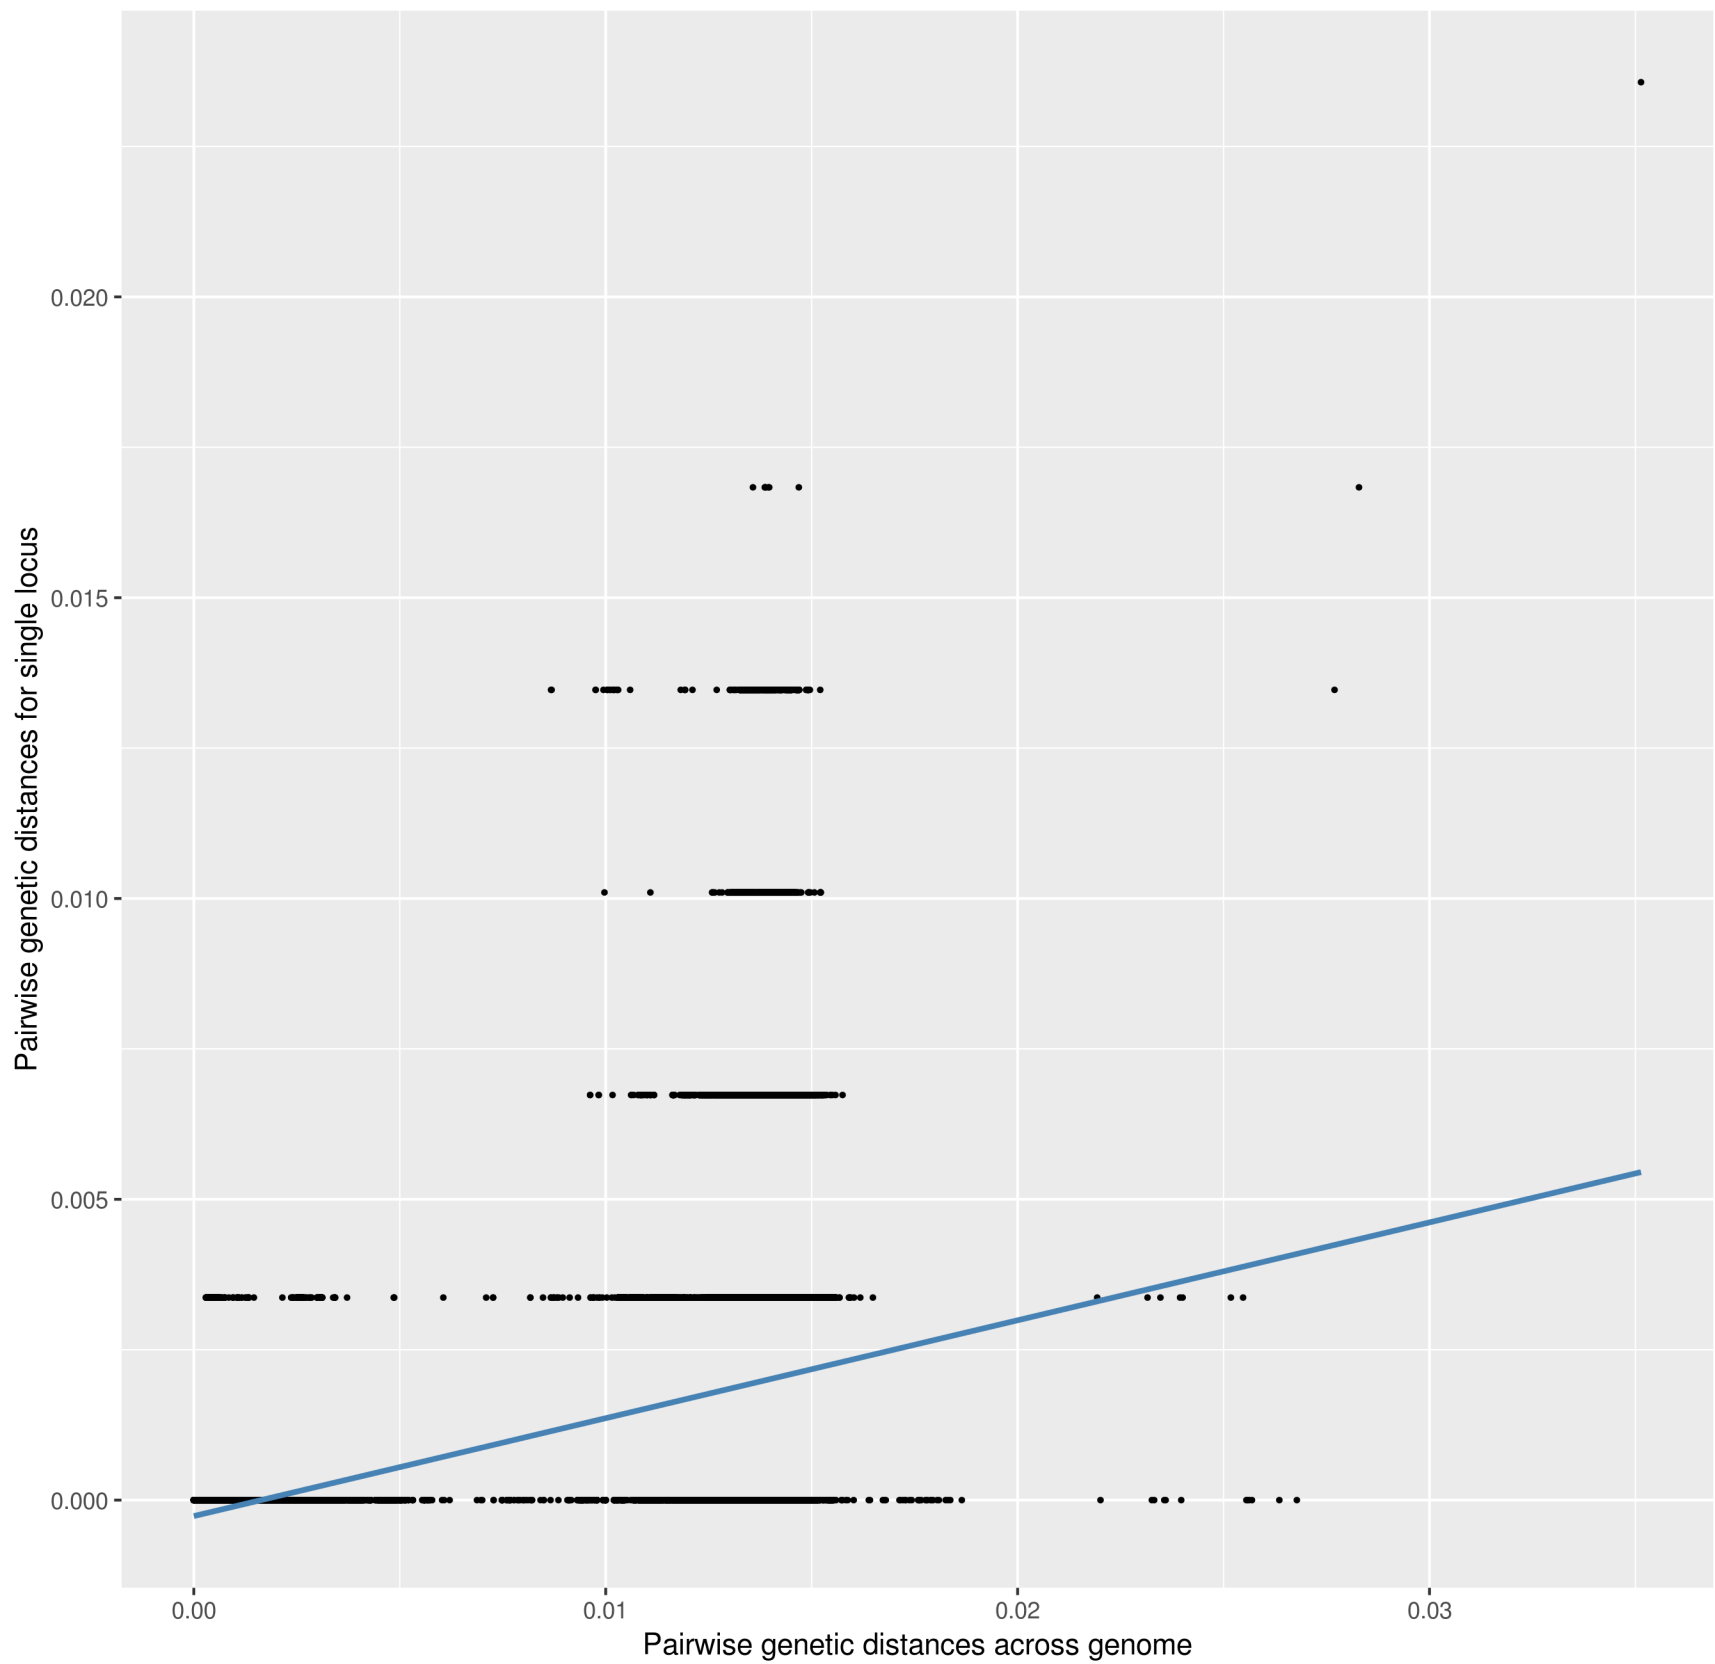



Pas\_pyrG\_high\_distance  $y = 0.47x + 0.043$   $R^2=0.0994982490010153$

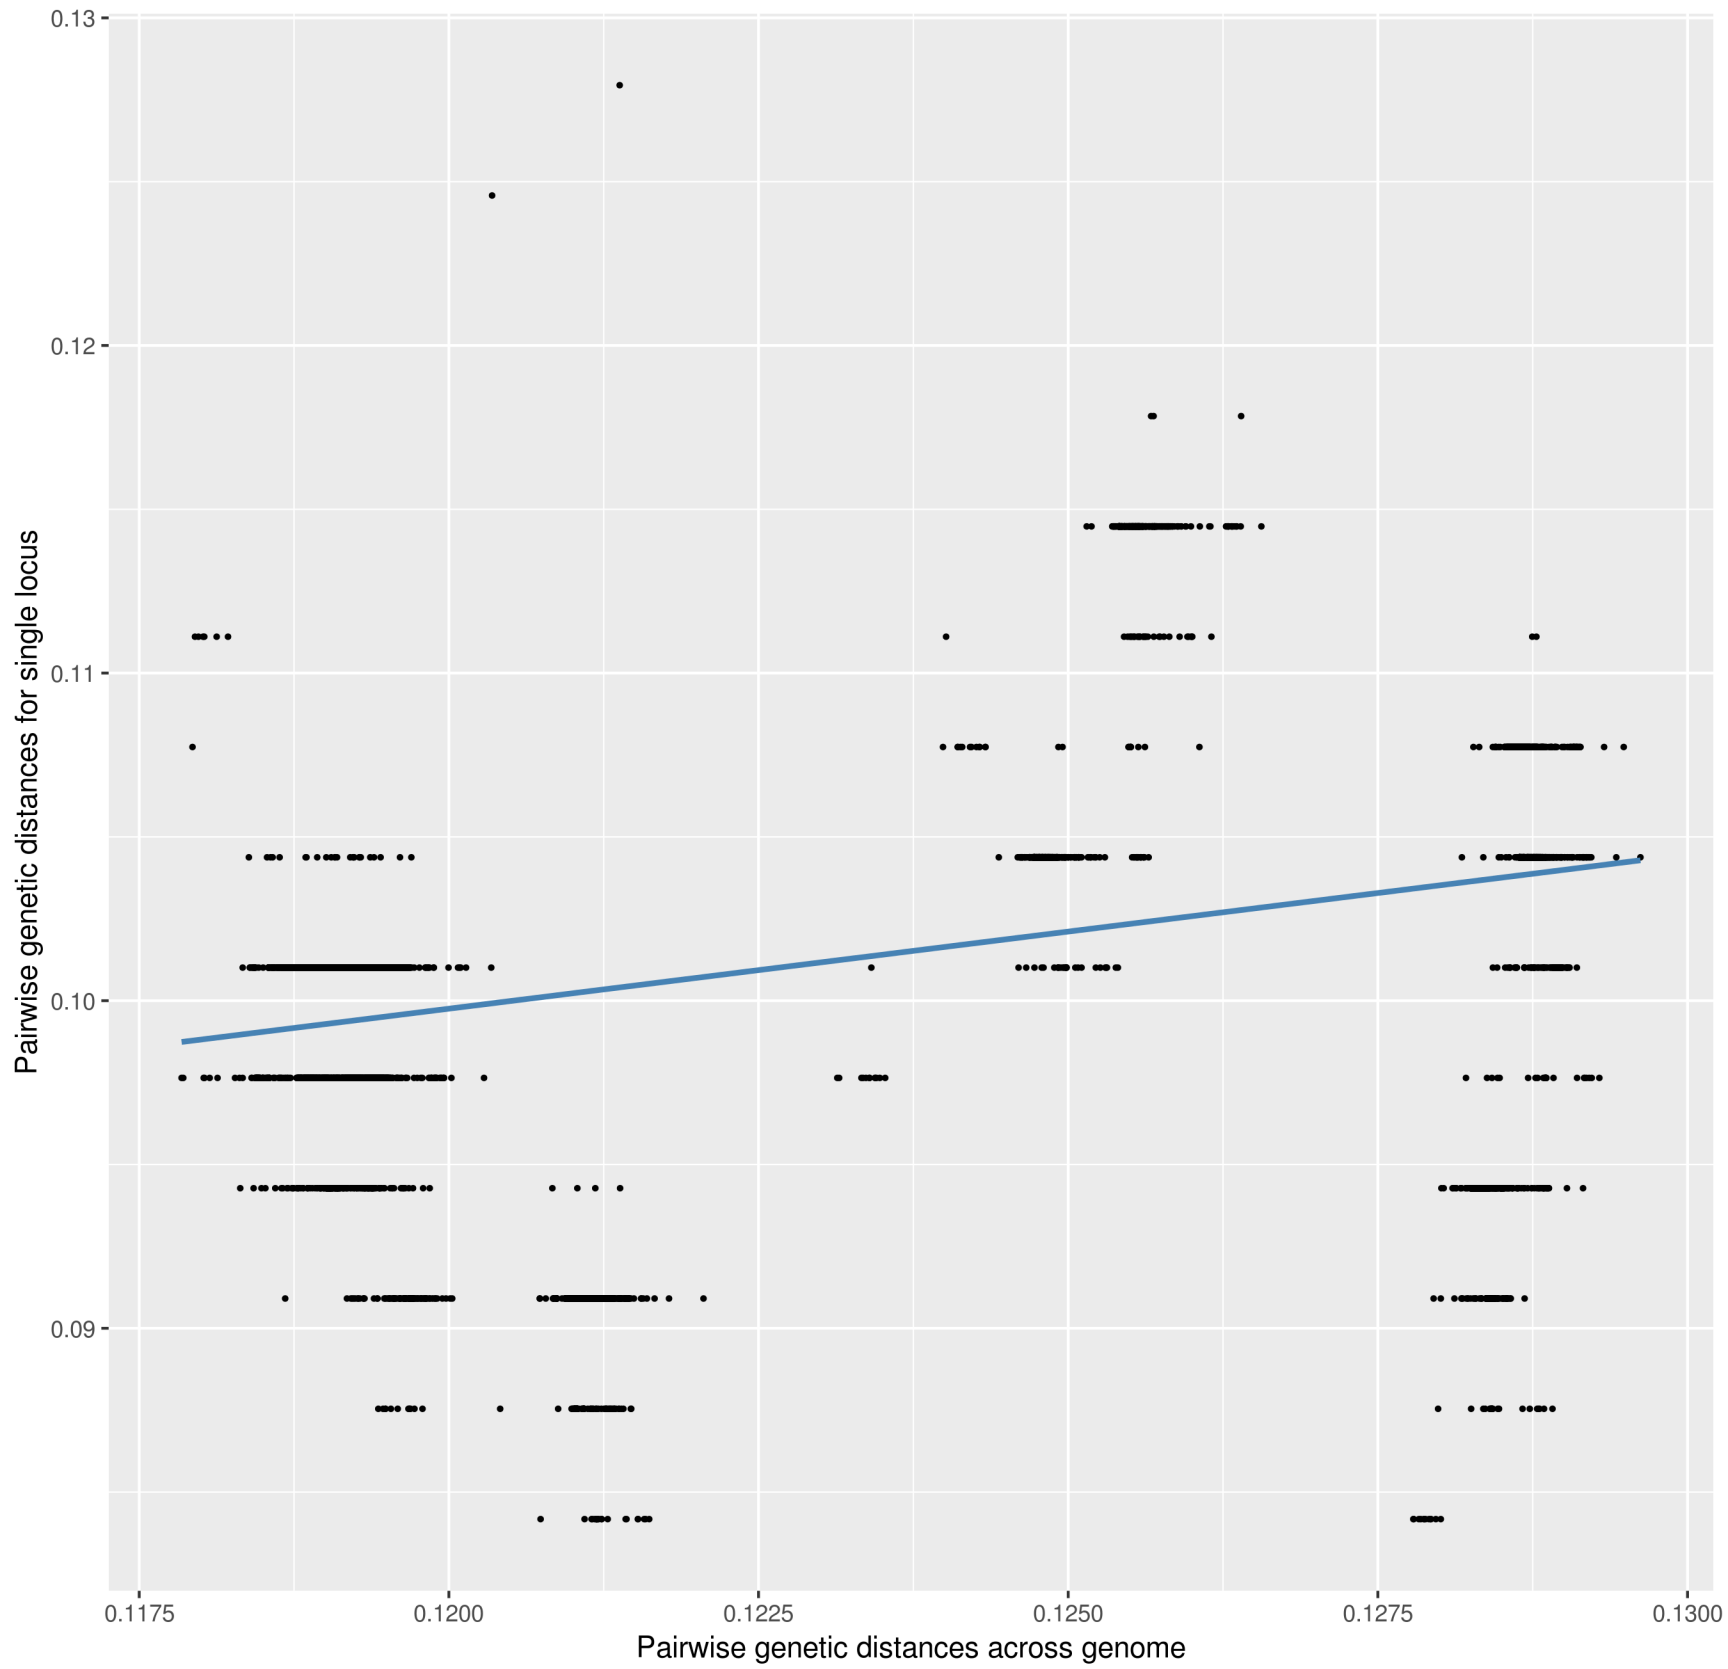

Pas\_recA  $y = 1.2x - 0.0036$   $R^2=0.951468723557328$

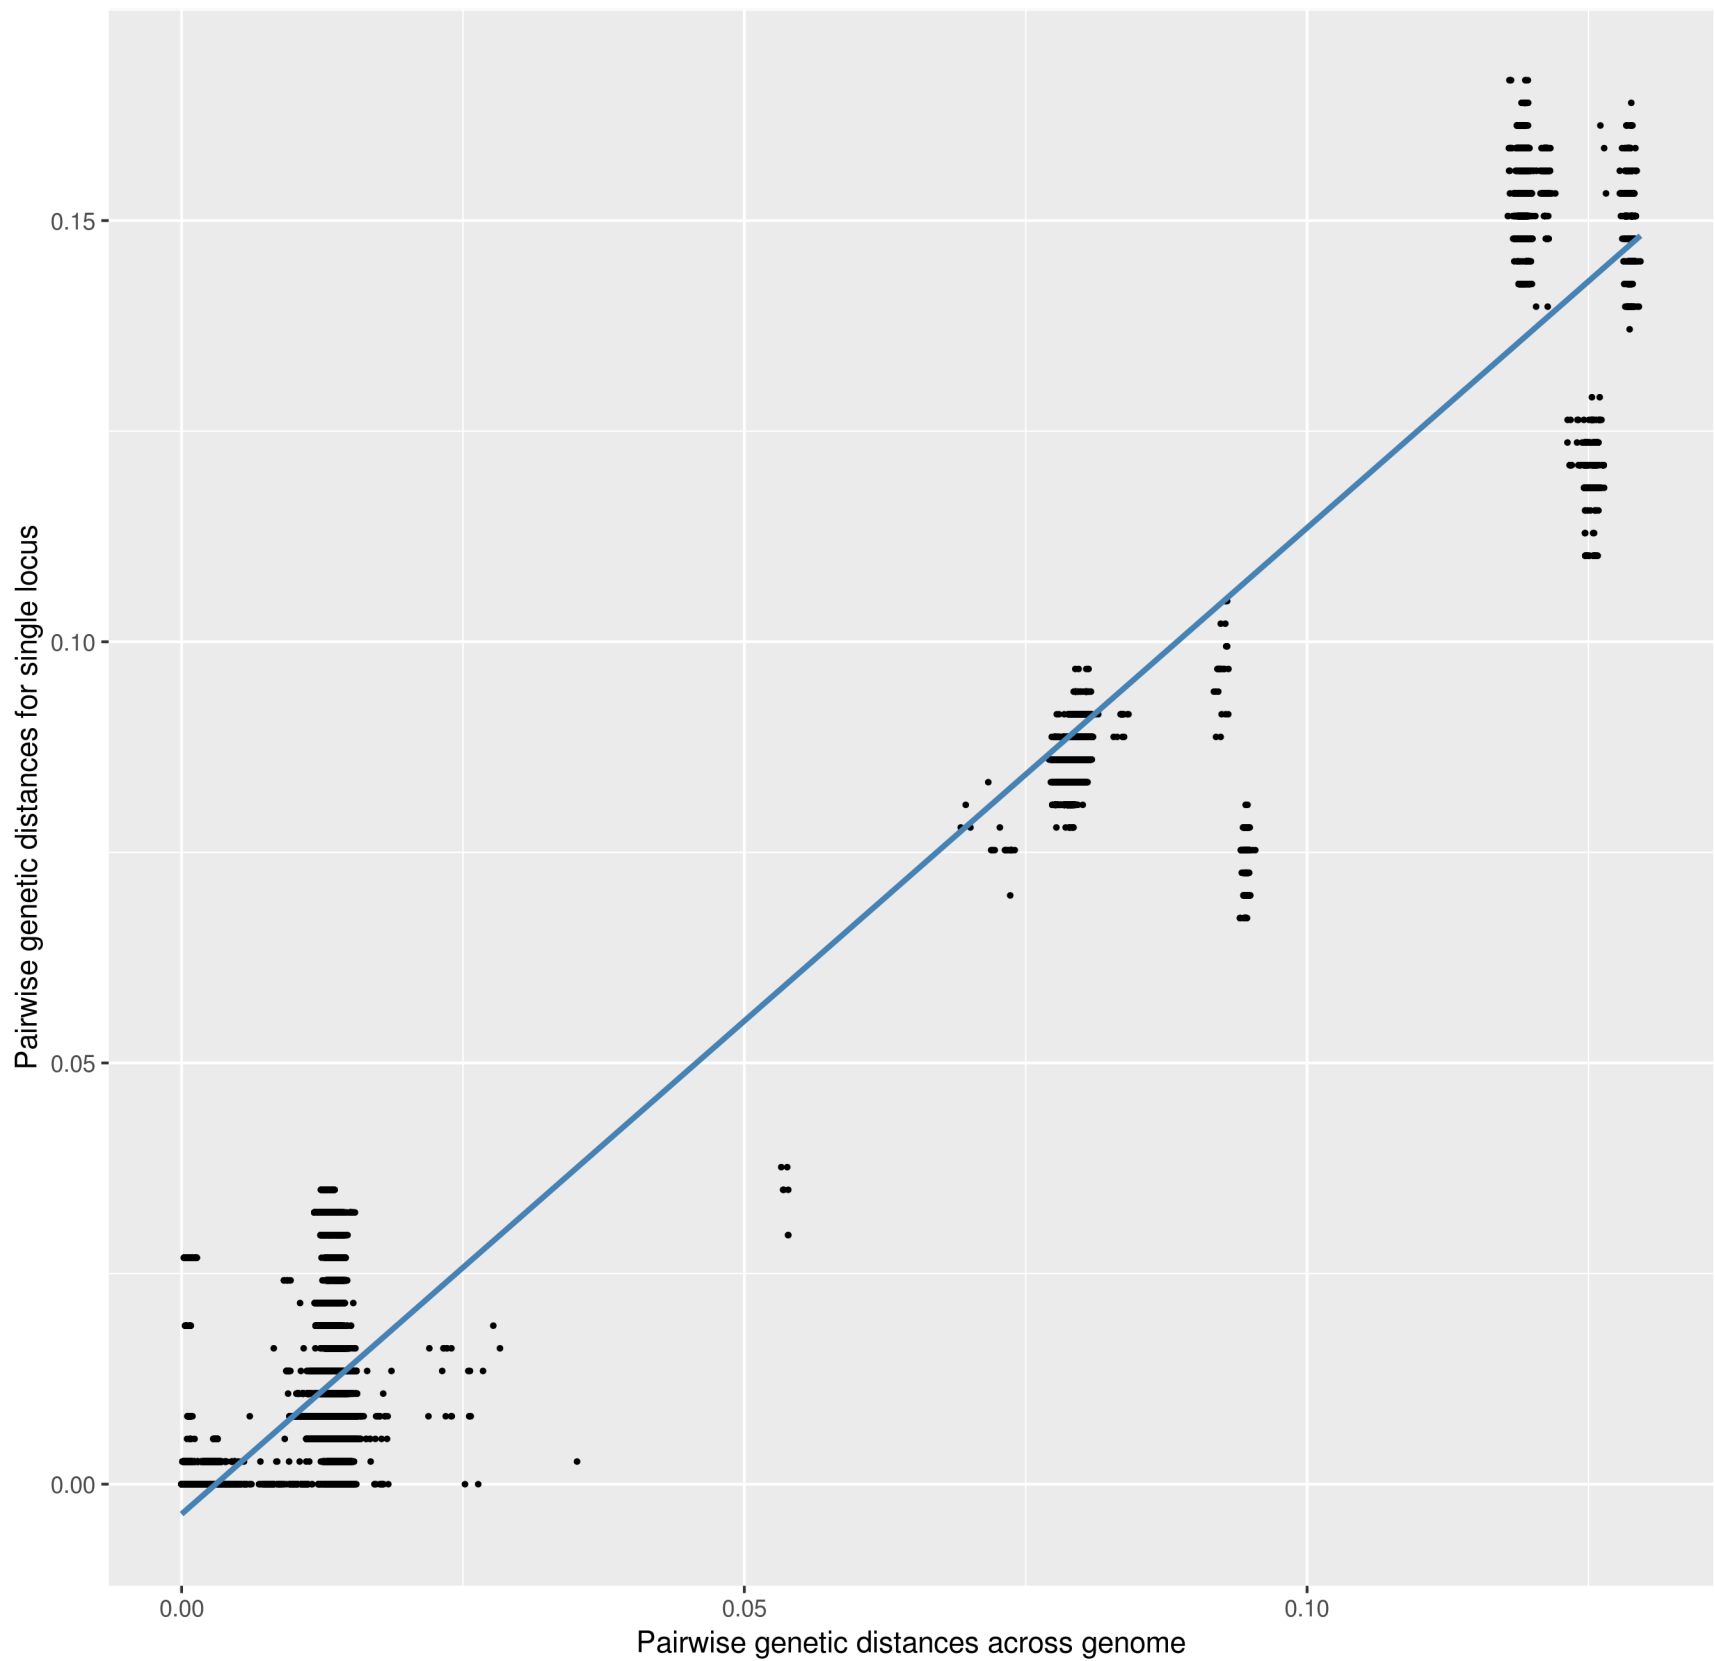

Pas\_recA\_low\_distance  $y = 0.86x - 0.00083$   $R^2=0.453632135713424$

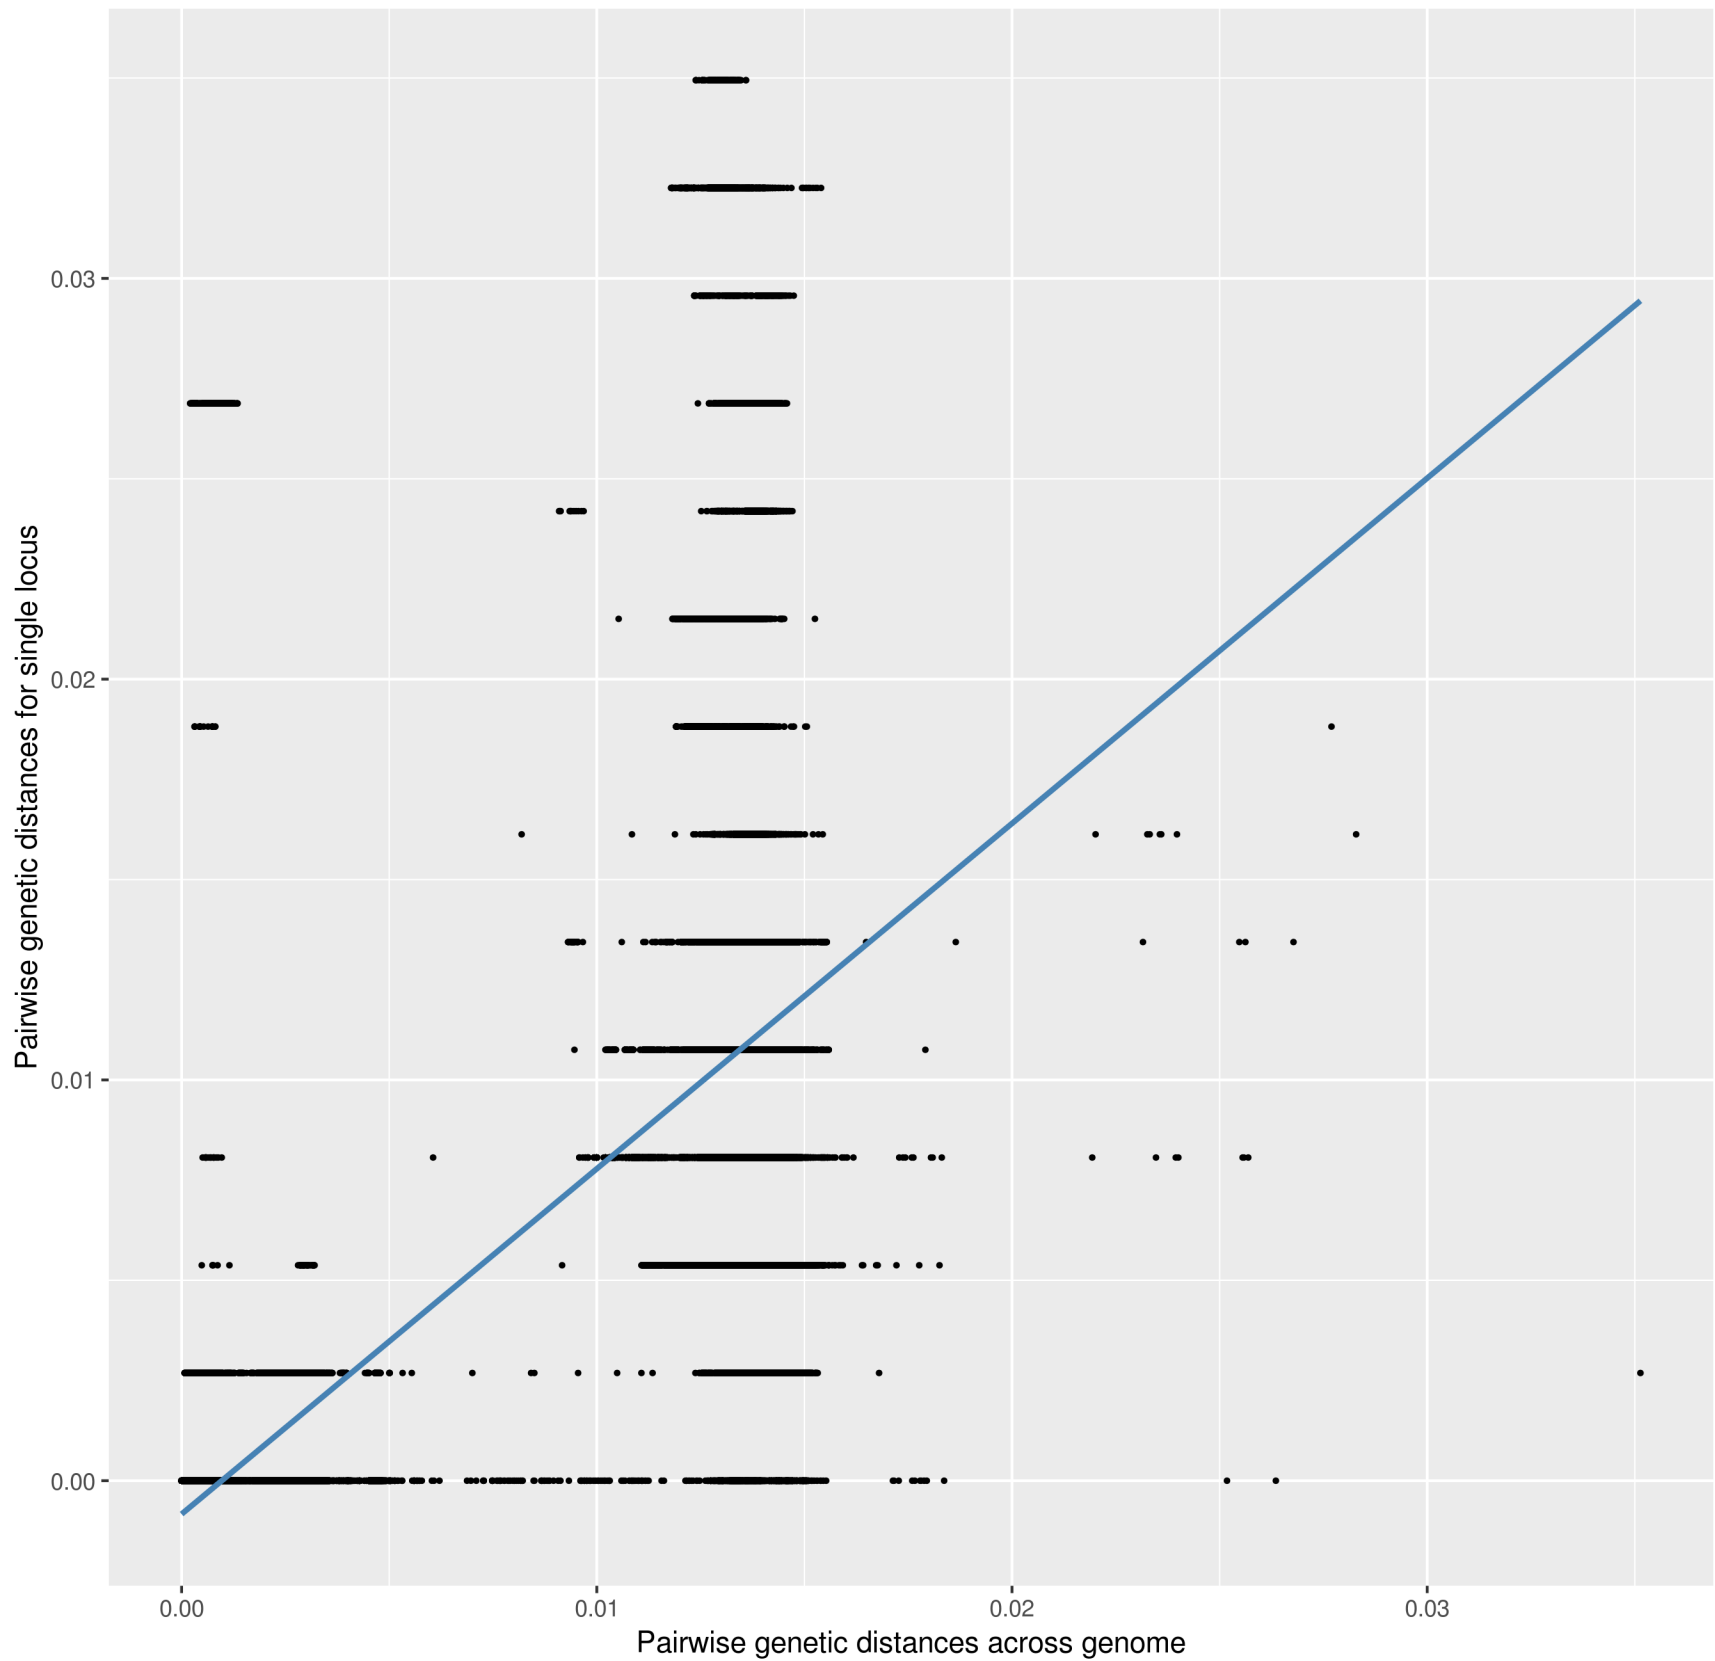

Pas\_recA\_mid\_distance  $y = -0.55x + 0.13$   $R^2=0.266040105284707$

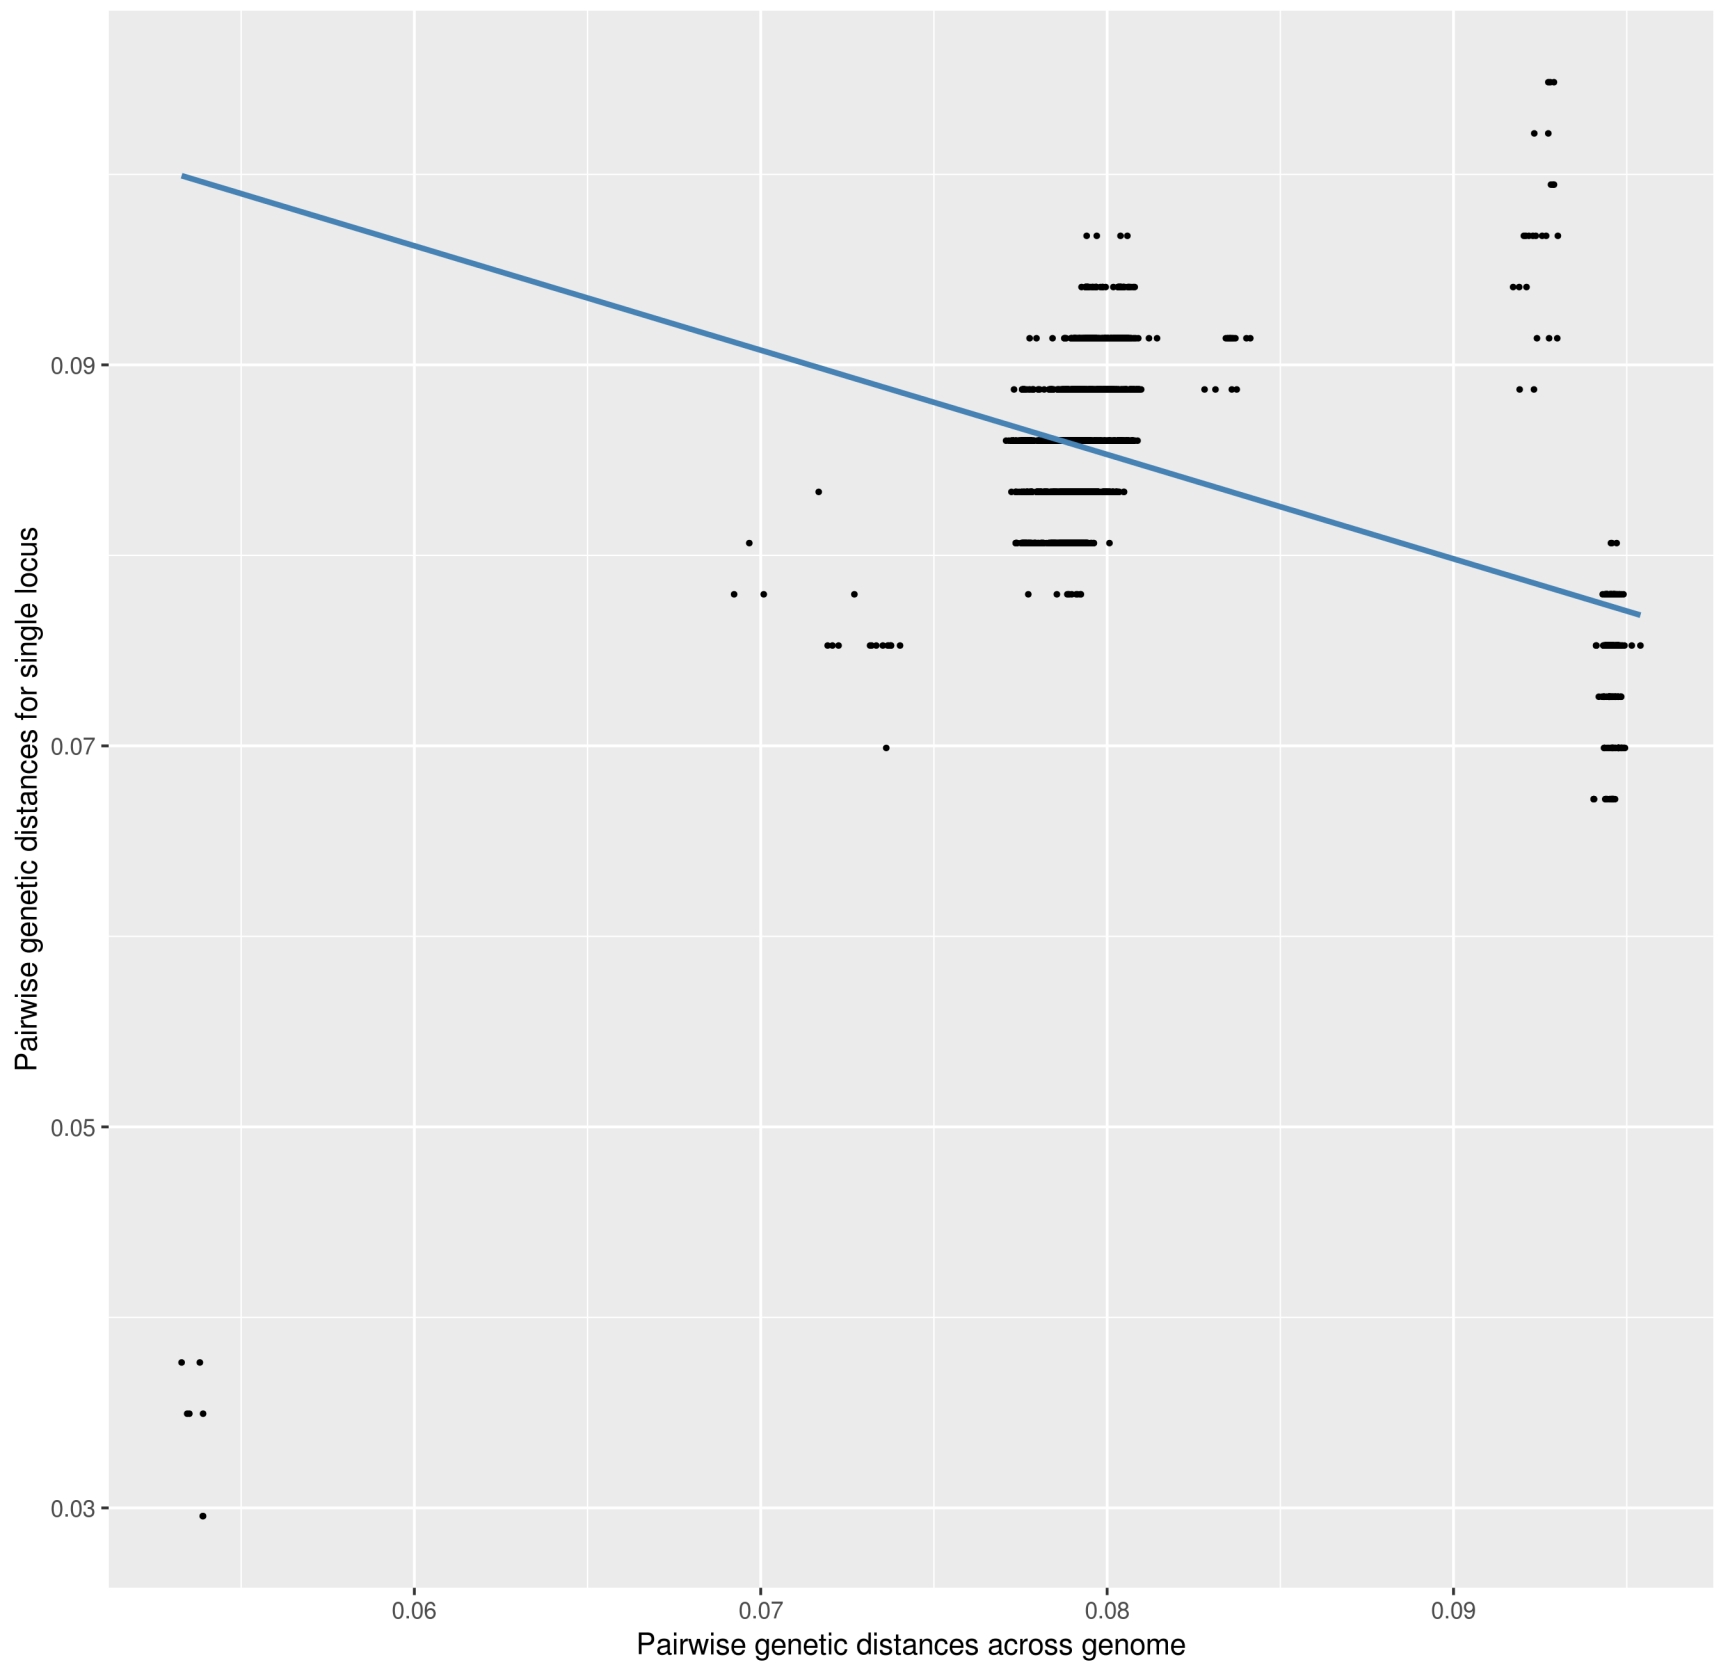

Pas\_recA\_high\_distance  $y = -1.4x + 0.32$   $R^2=0.200825096616216$

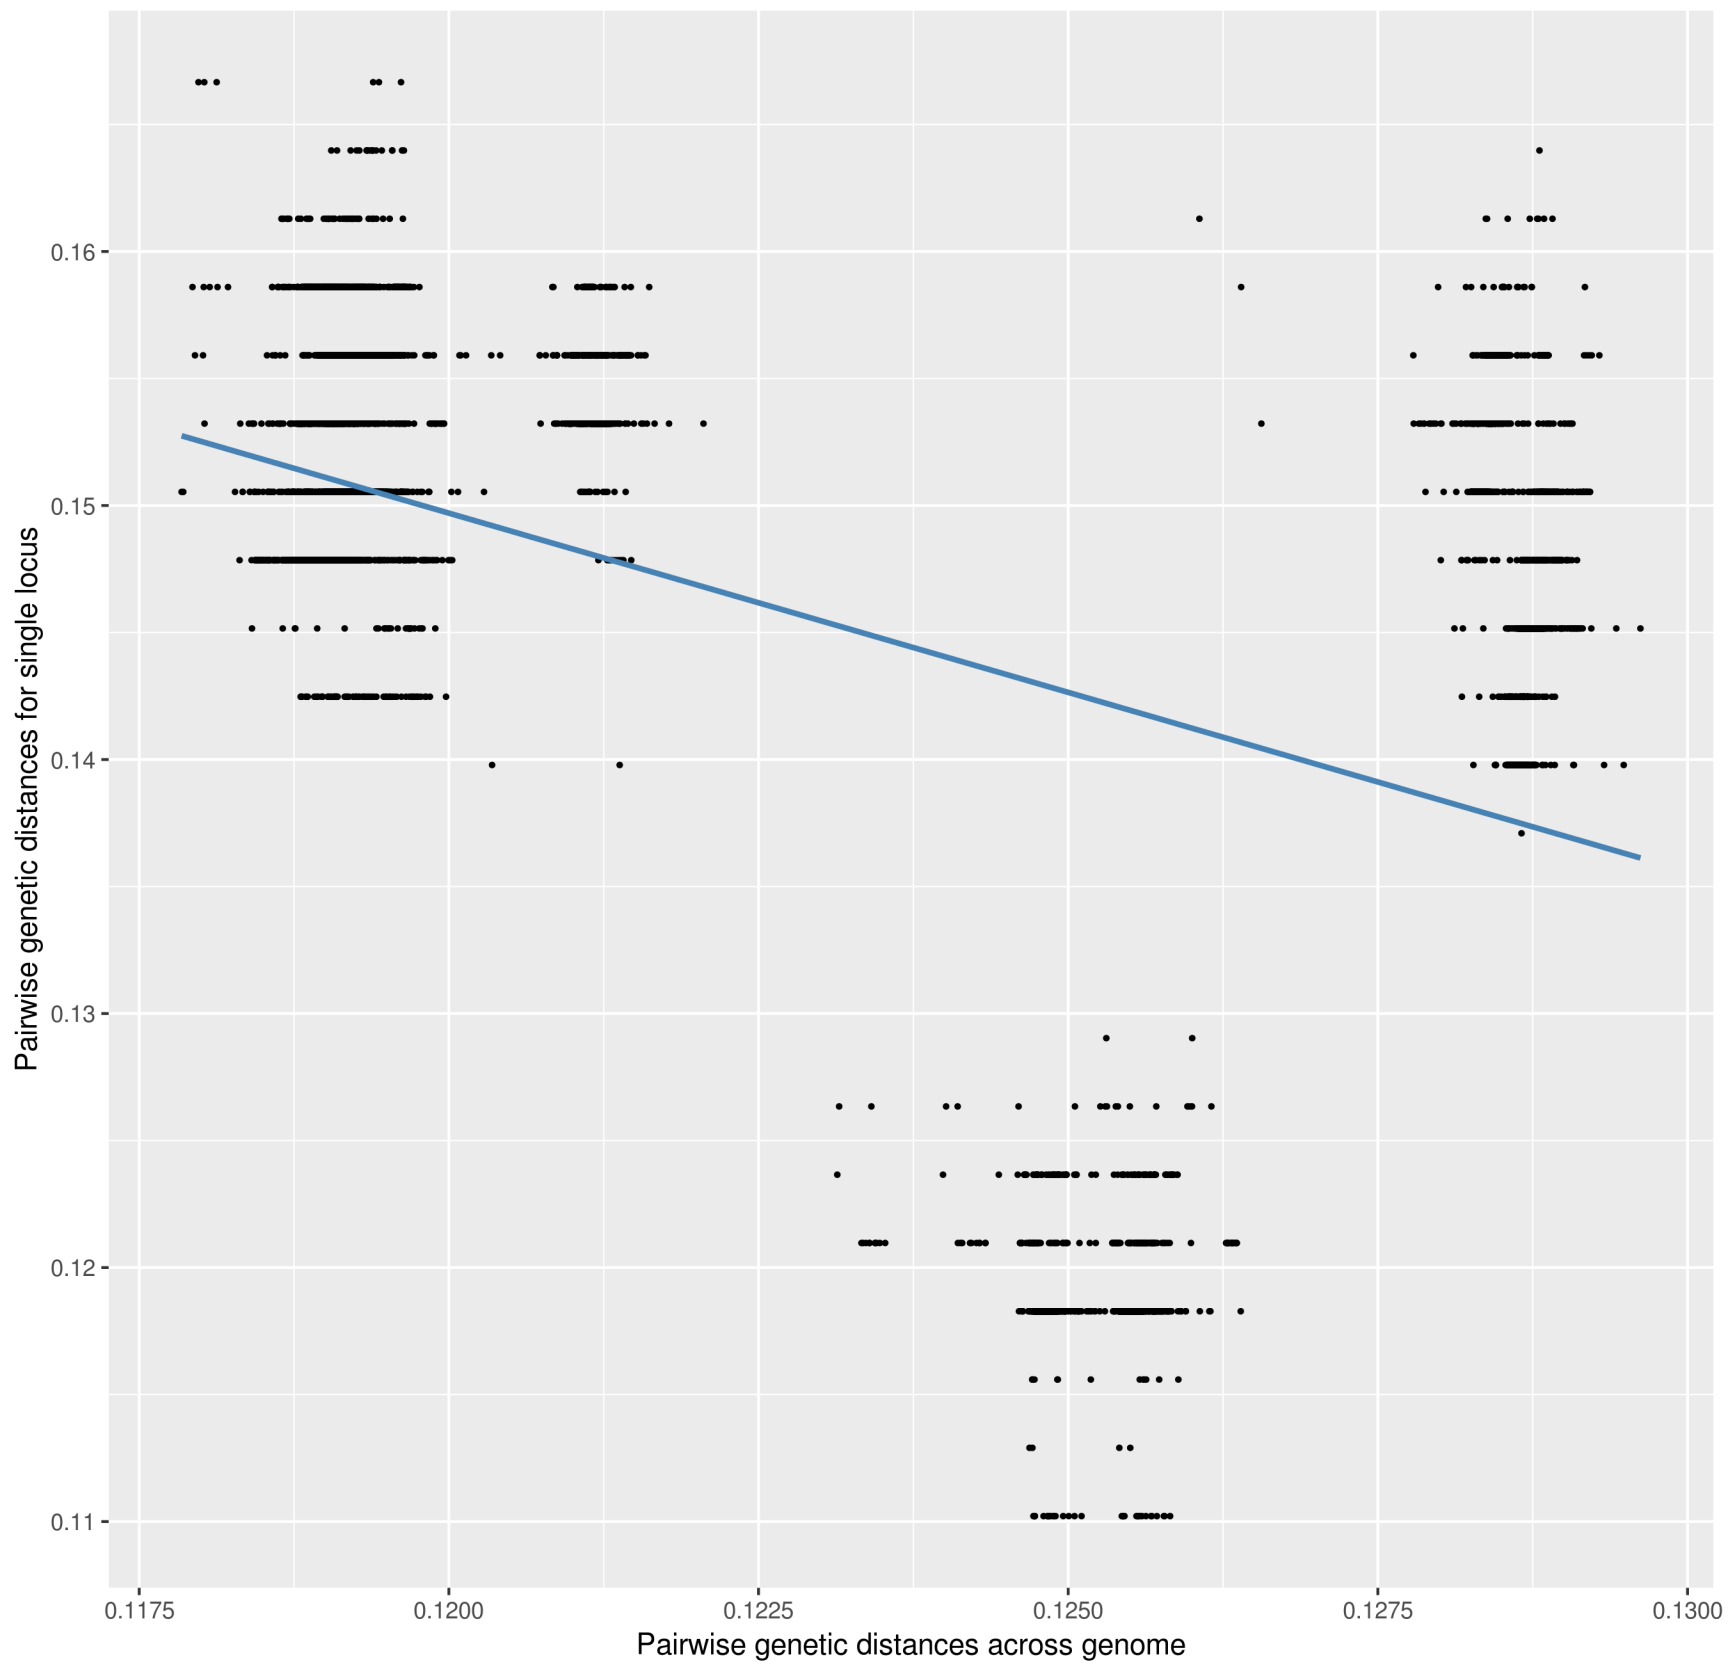





Pas\_rplB\_low\_distance  $y = 0.25x - 0.00023$   $R^2=0.462640630083718$

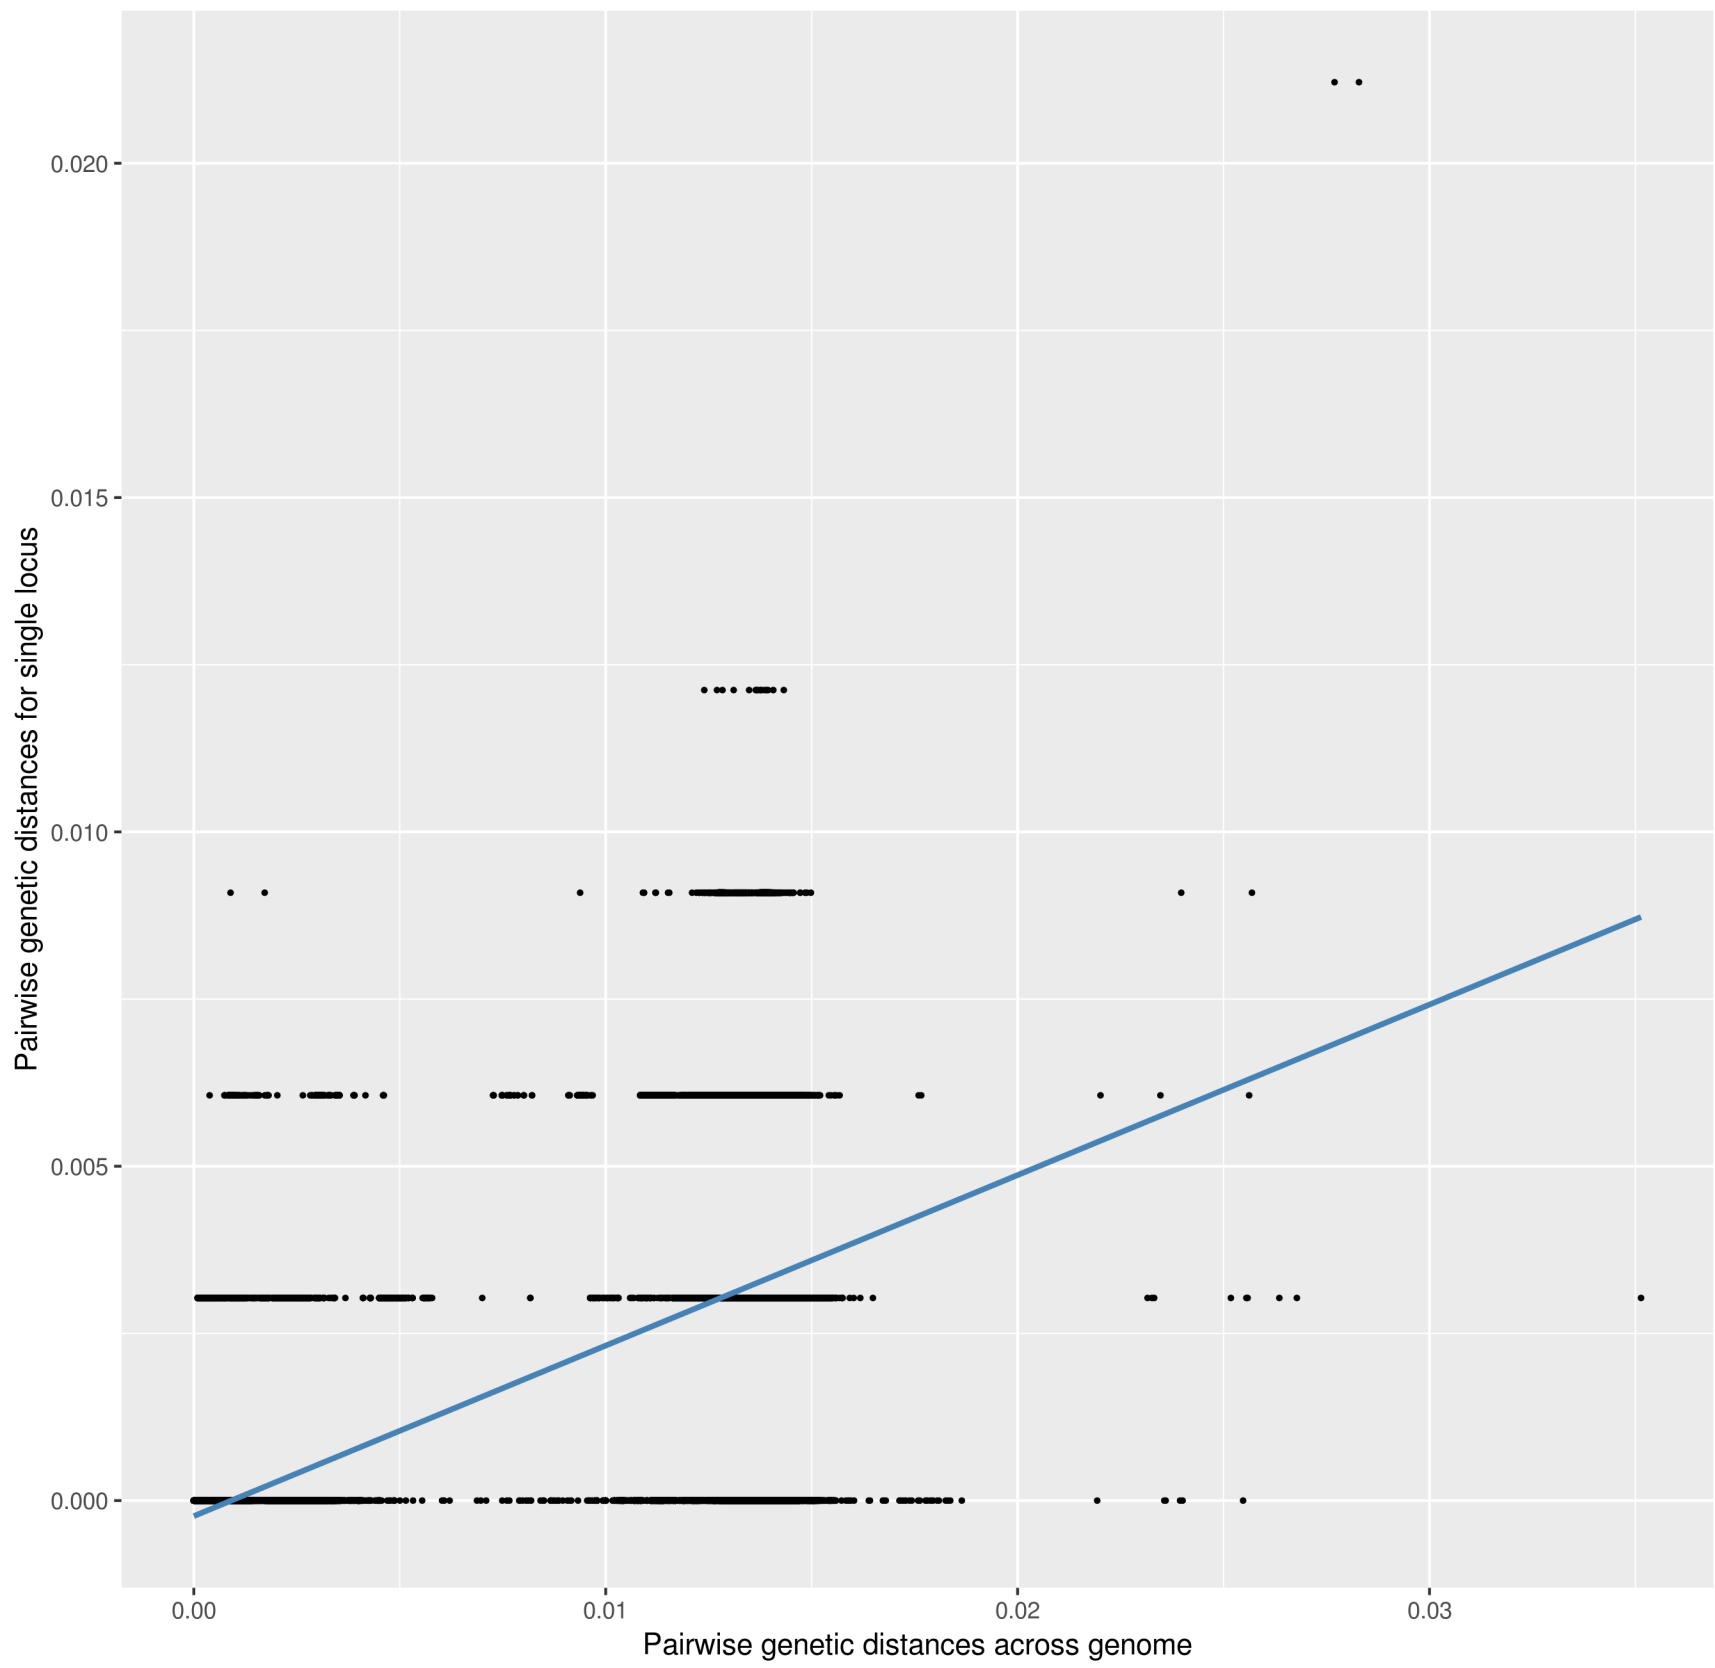



Pas\_rplB\_high\_distance  $y = 1.1x - 0.081$   $R^2 = 0.364681656400844$

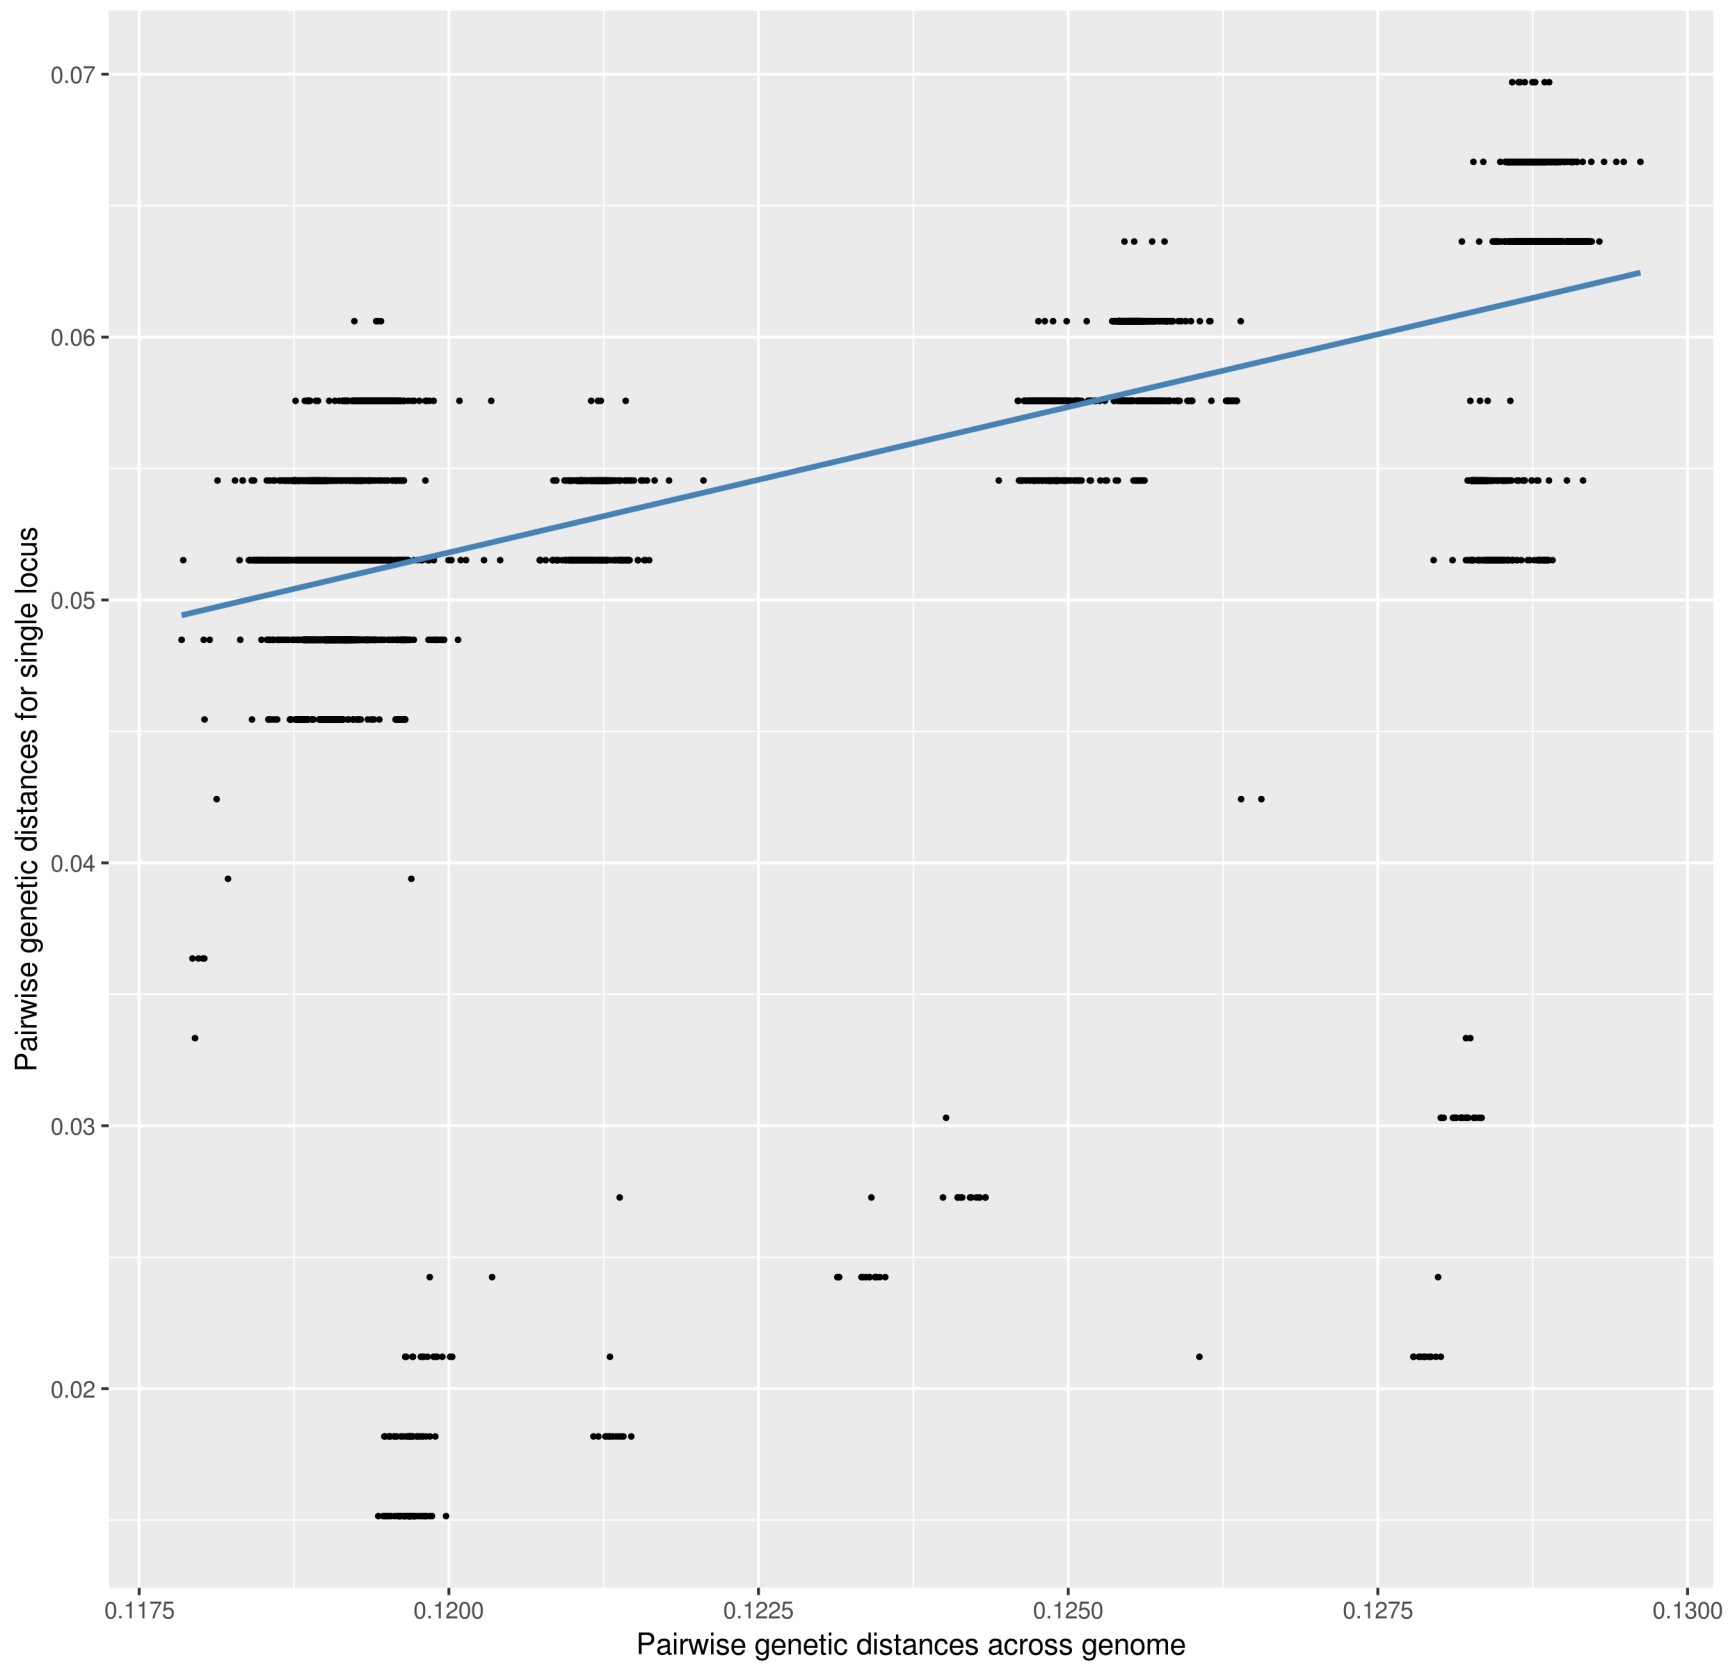

Pas\_rpoB  $y = 0.61x - 0.0031$   $R^2=0.952359567082838$

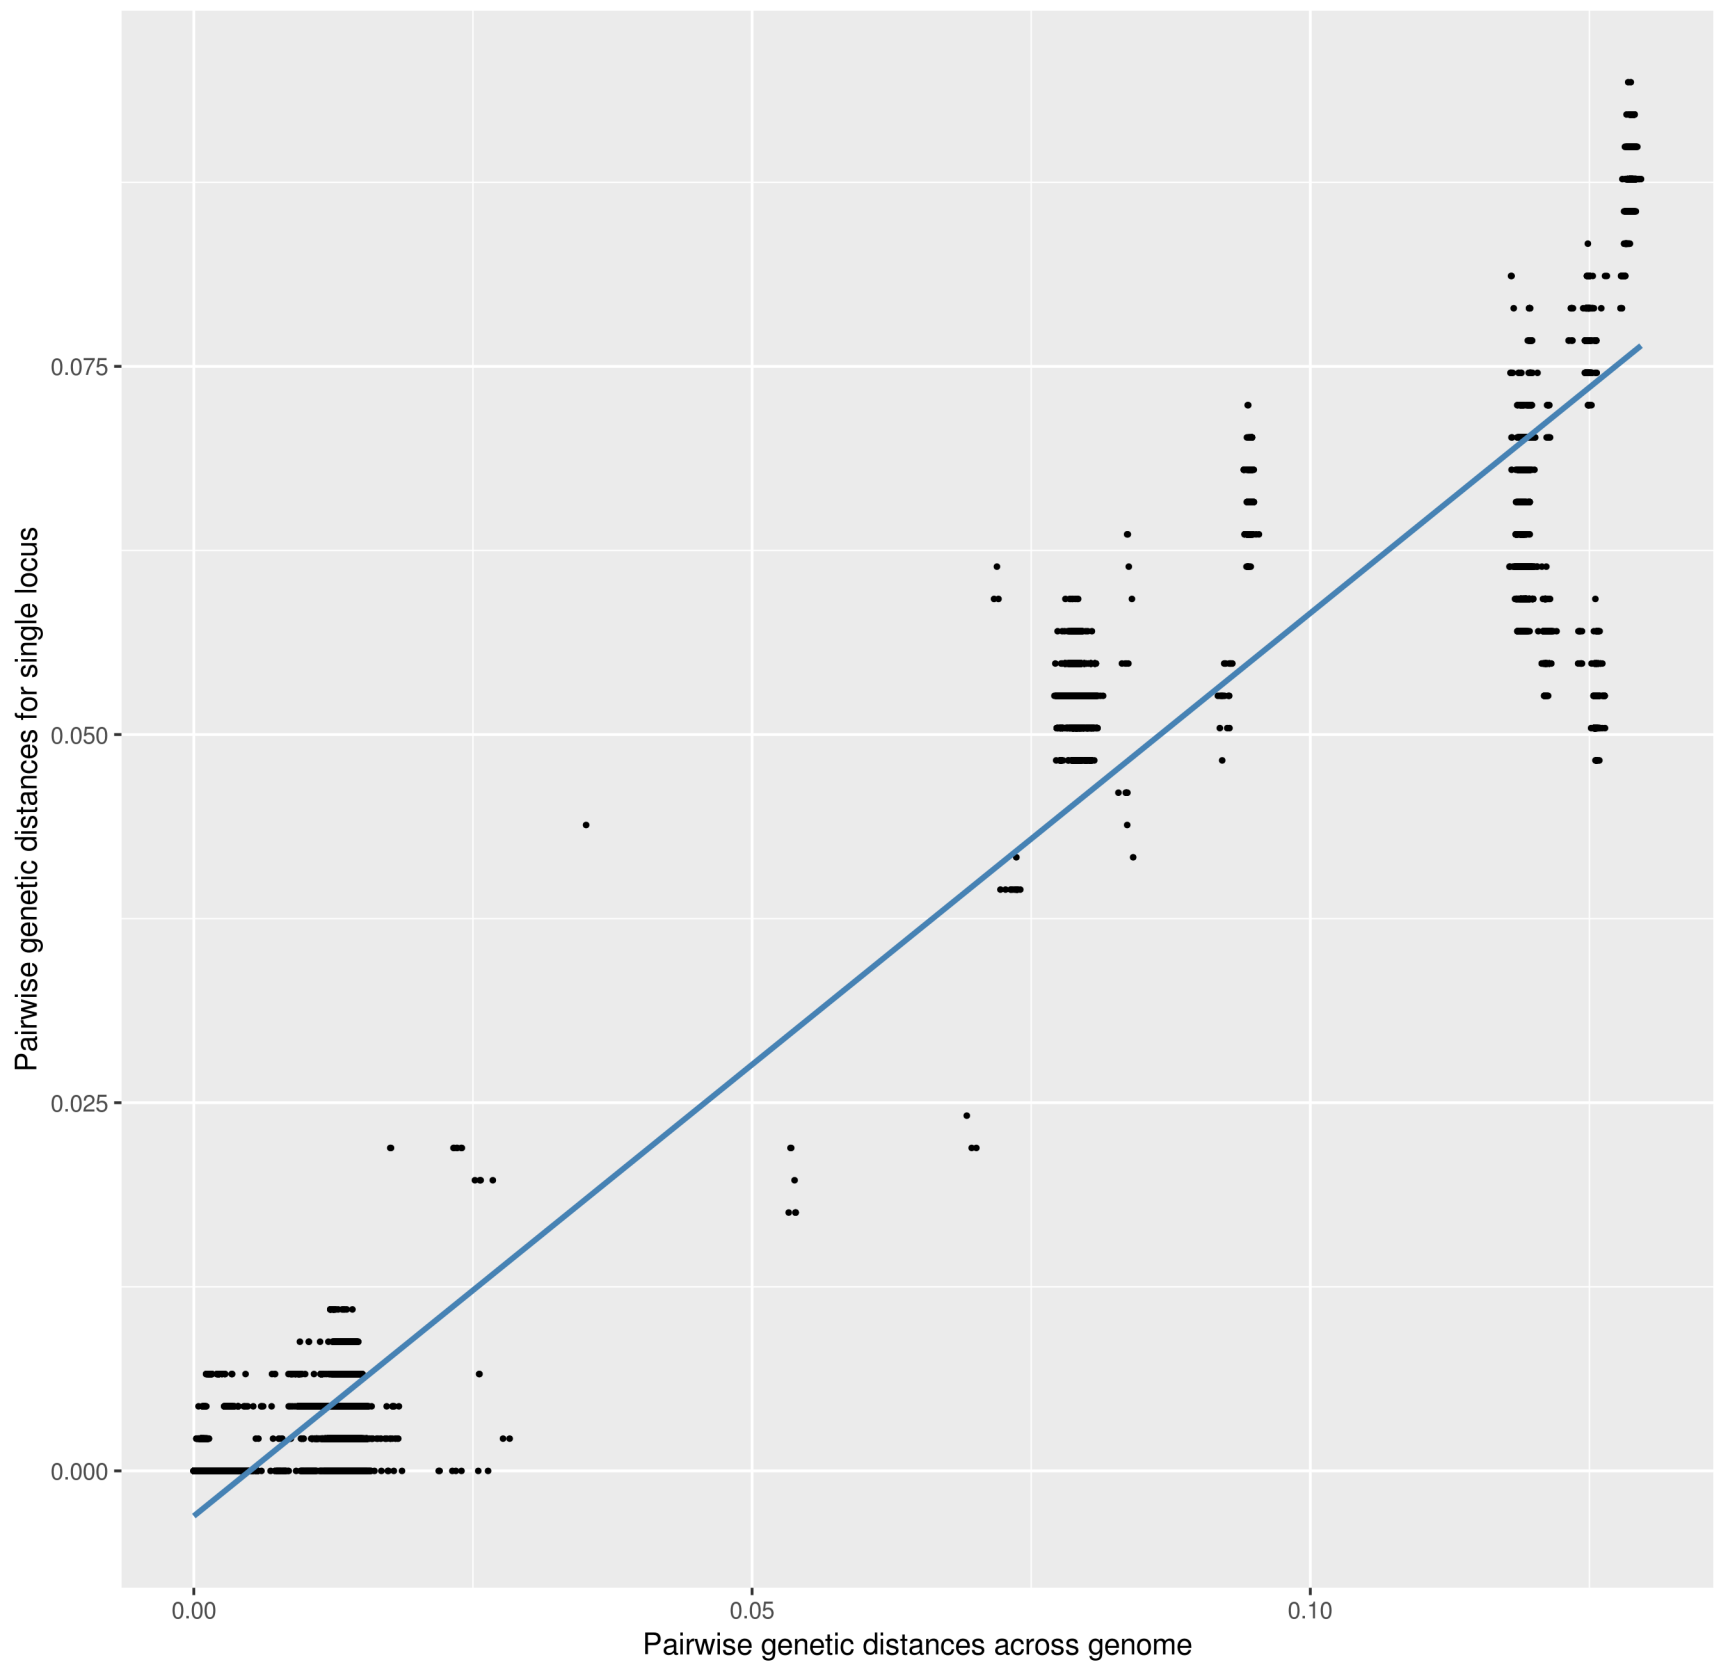

Pas\_rpoB\_low\_distance  $y = 0.29x - 4e-04$   $R^2=0.533079520700232$

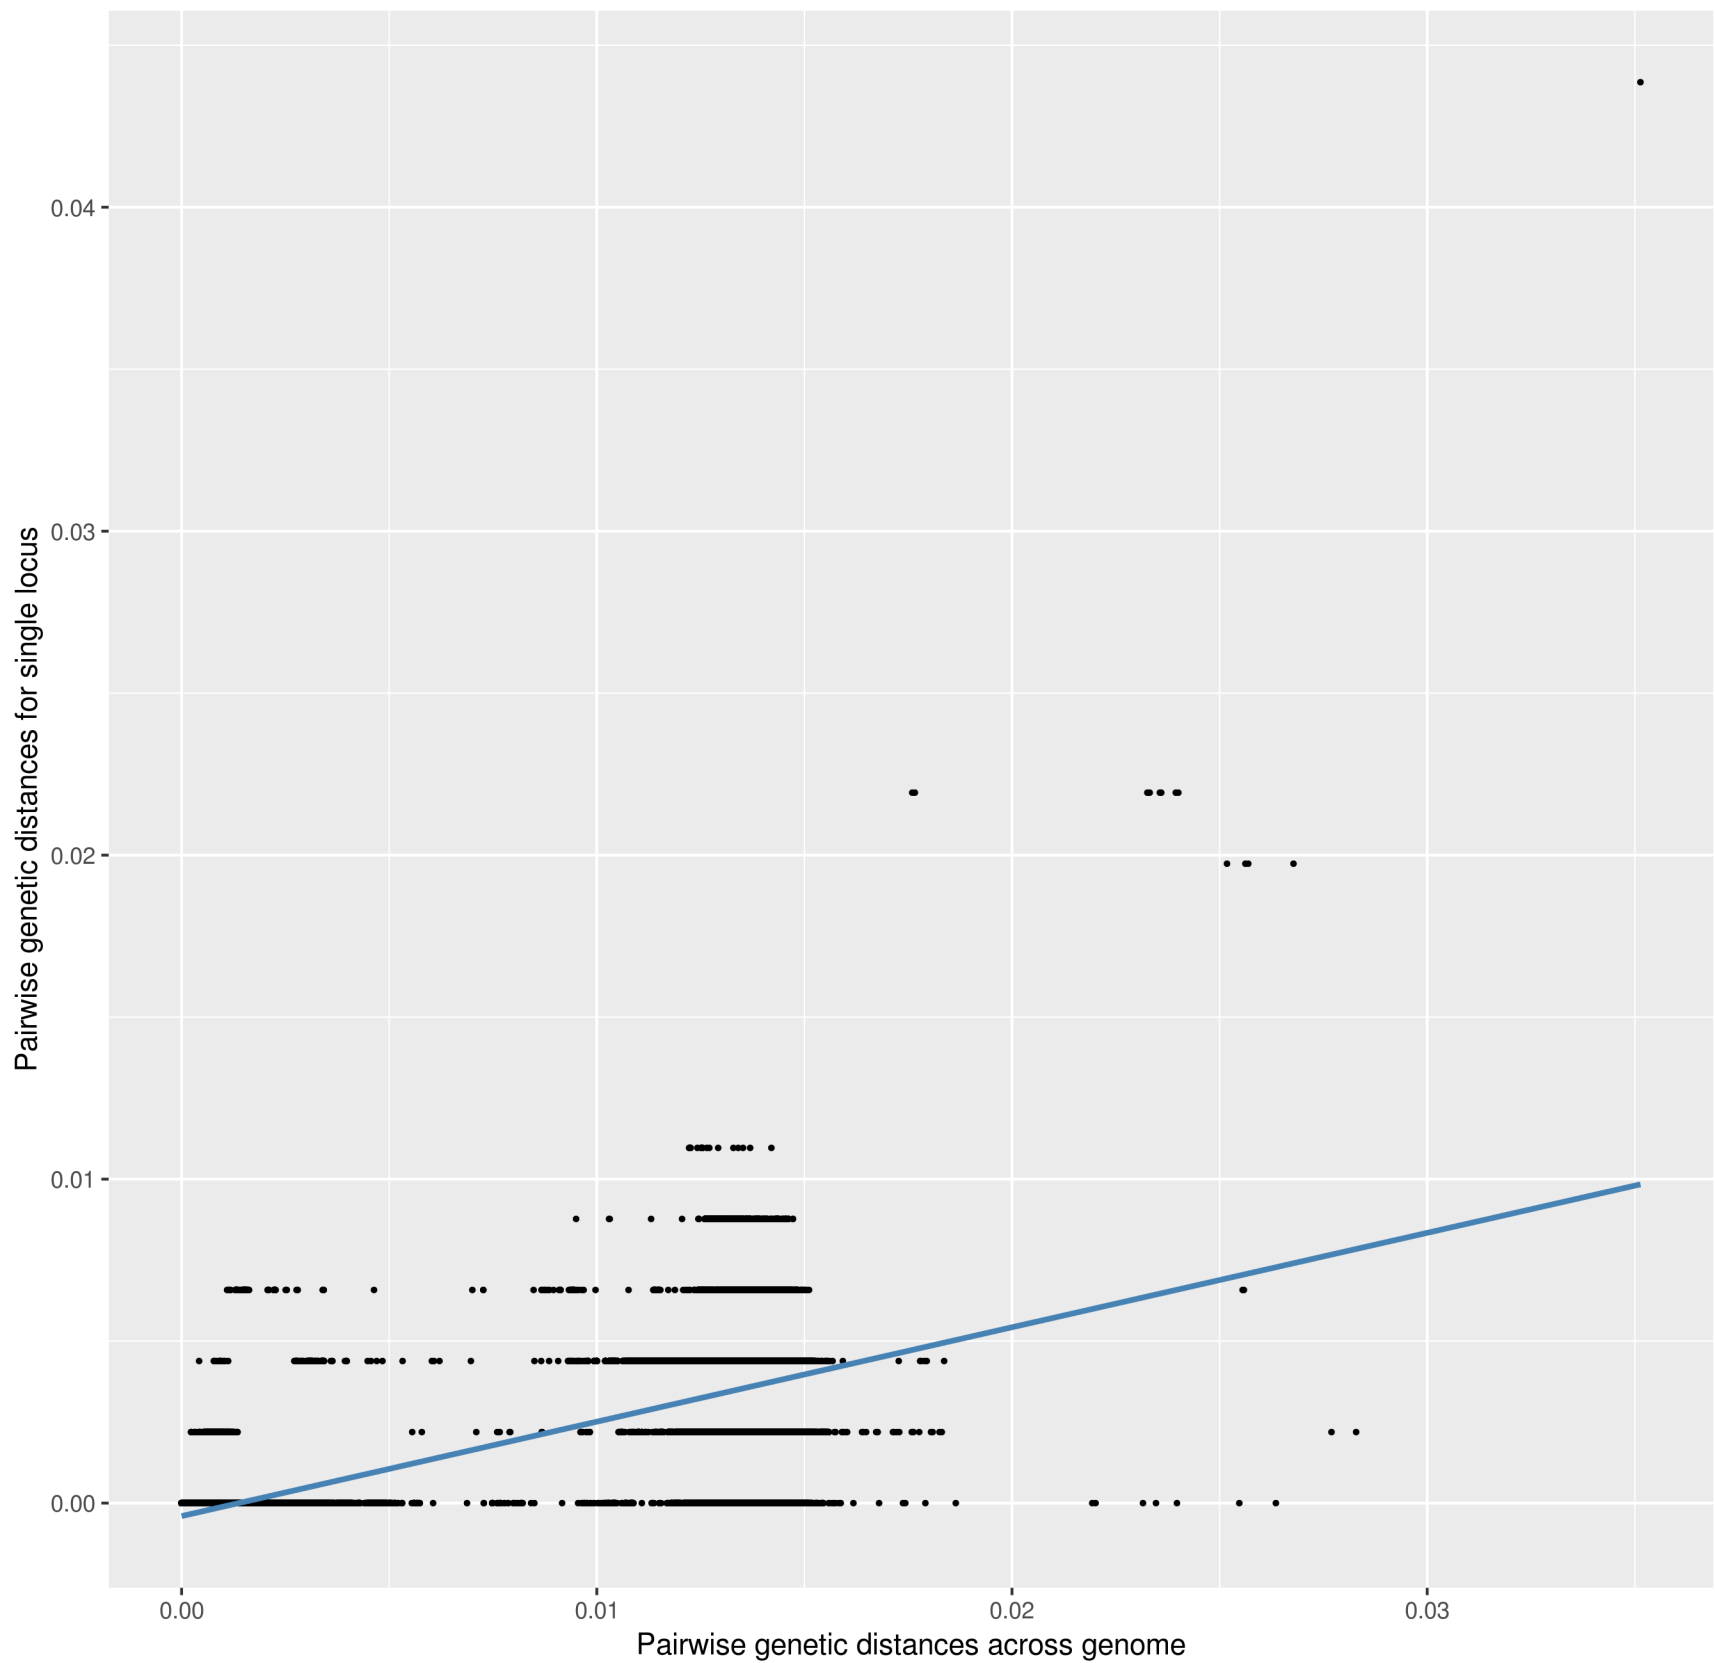

Pas\_rpoB\_mid\_distance  $y = 0.74x - 0.0056$   $R^2=0.717505691274126$

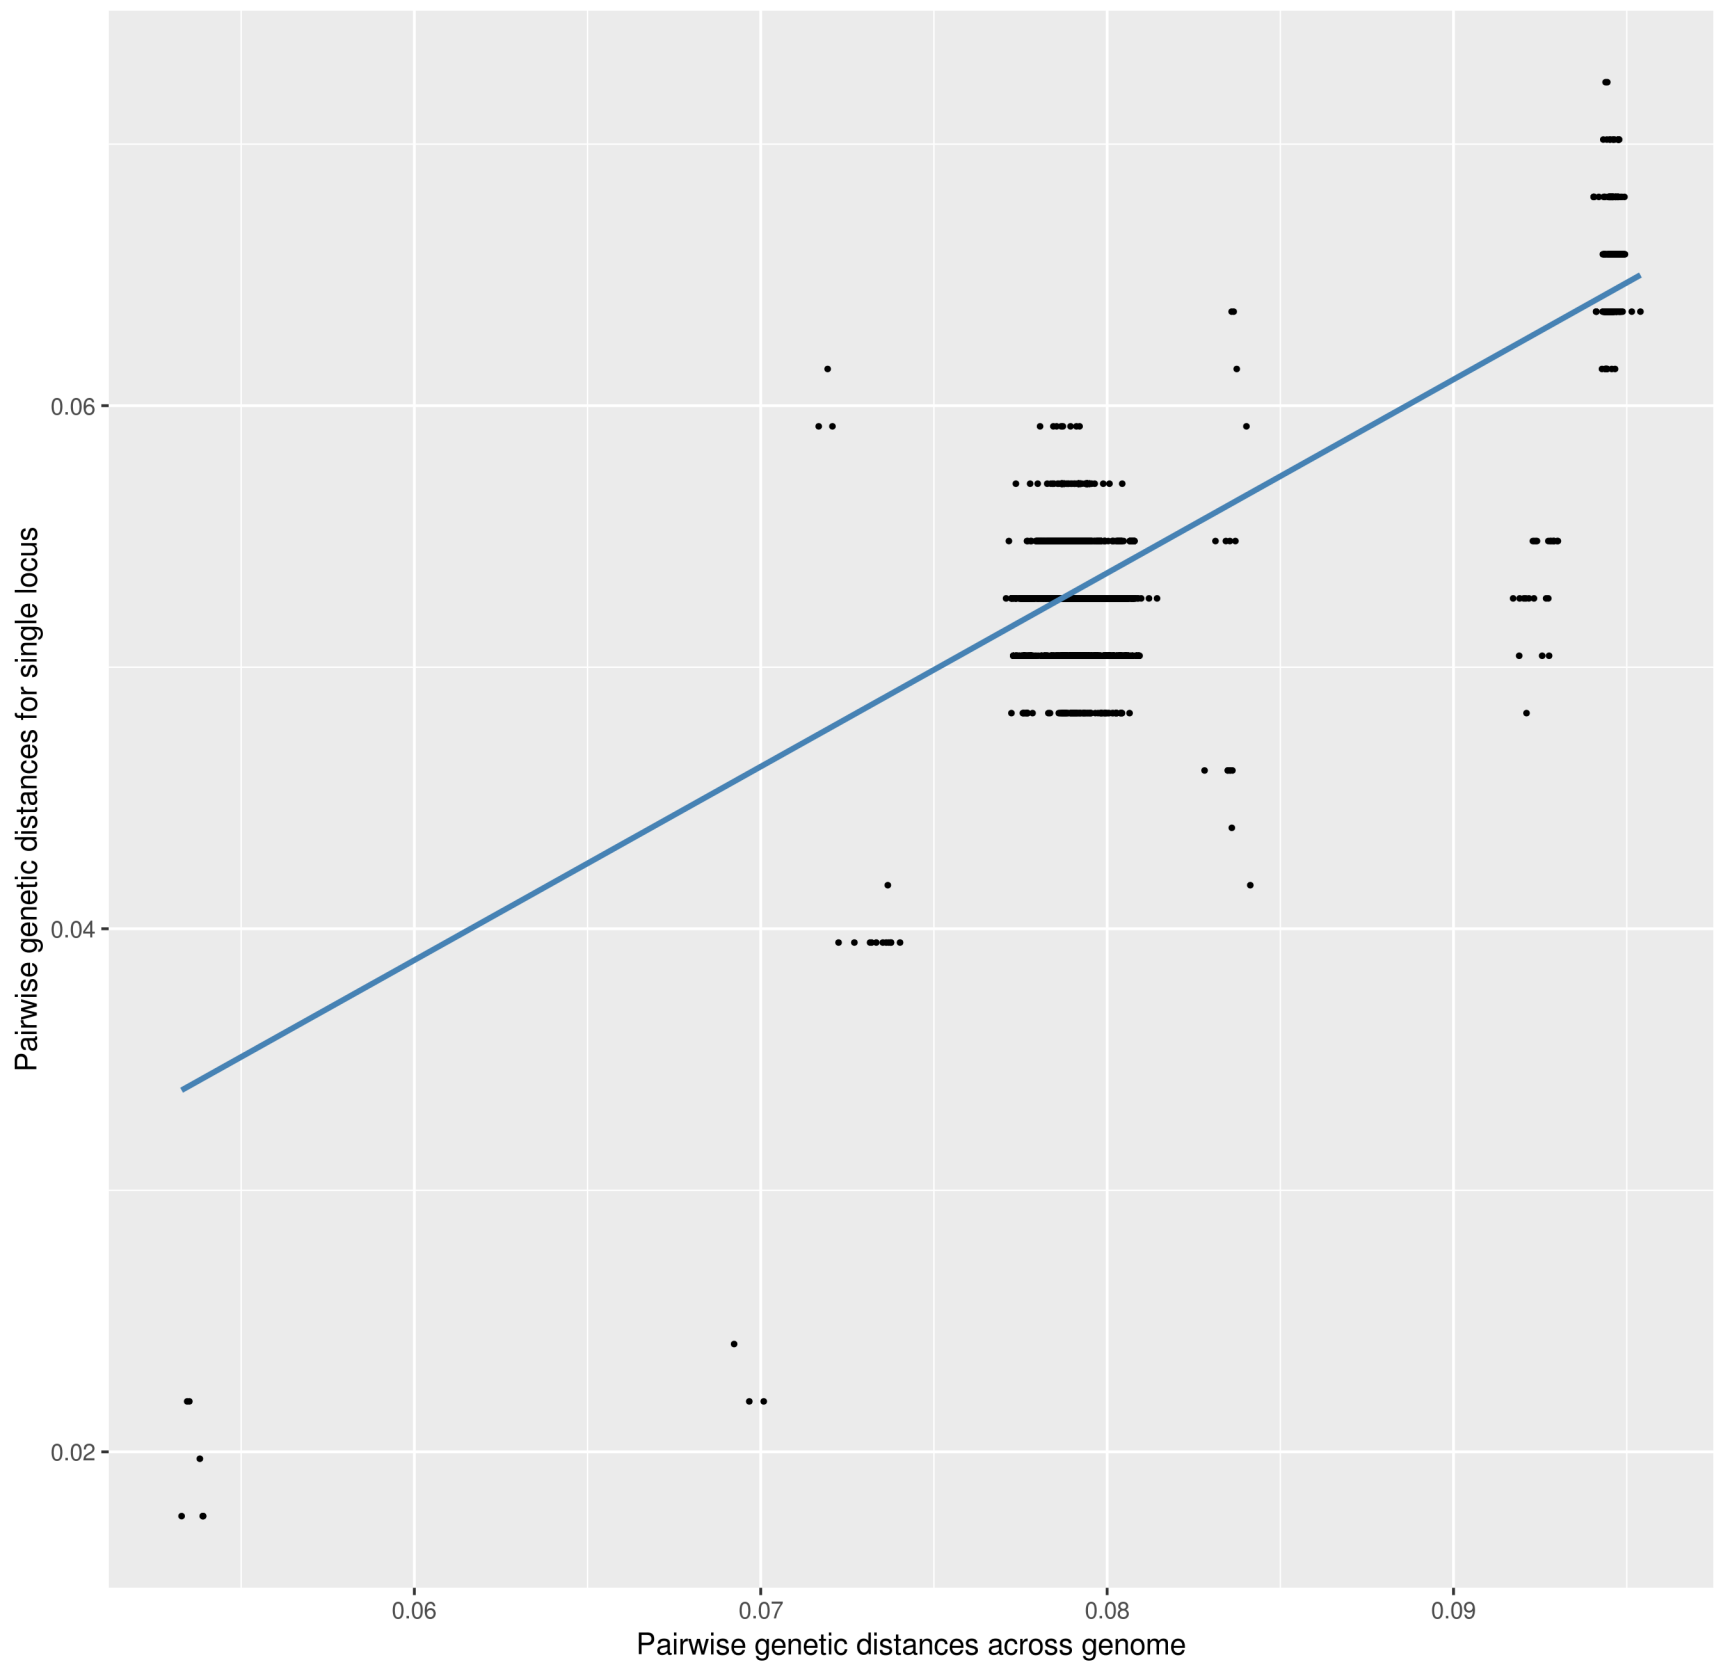

Pas\_rpoB\_high\_distance  $y = 2x - 0.18$   $R^2=0.468829114531128$

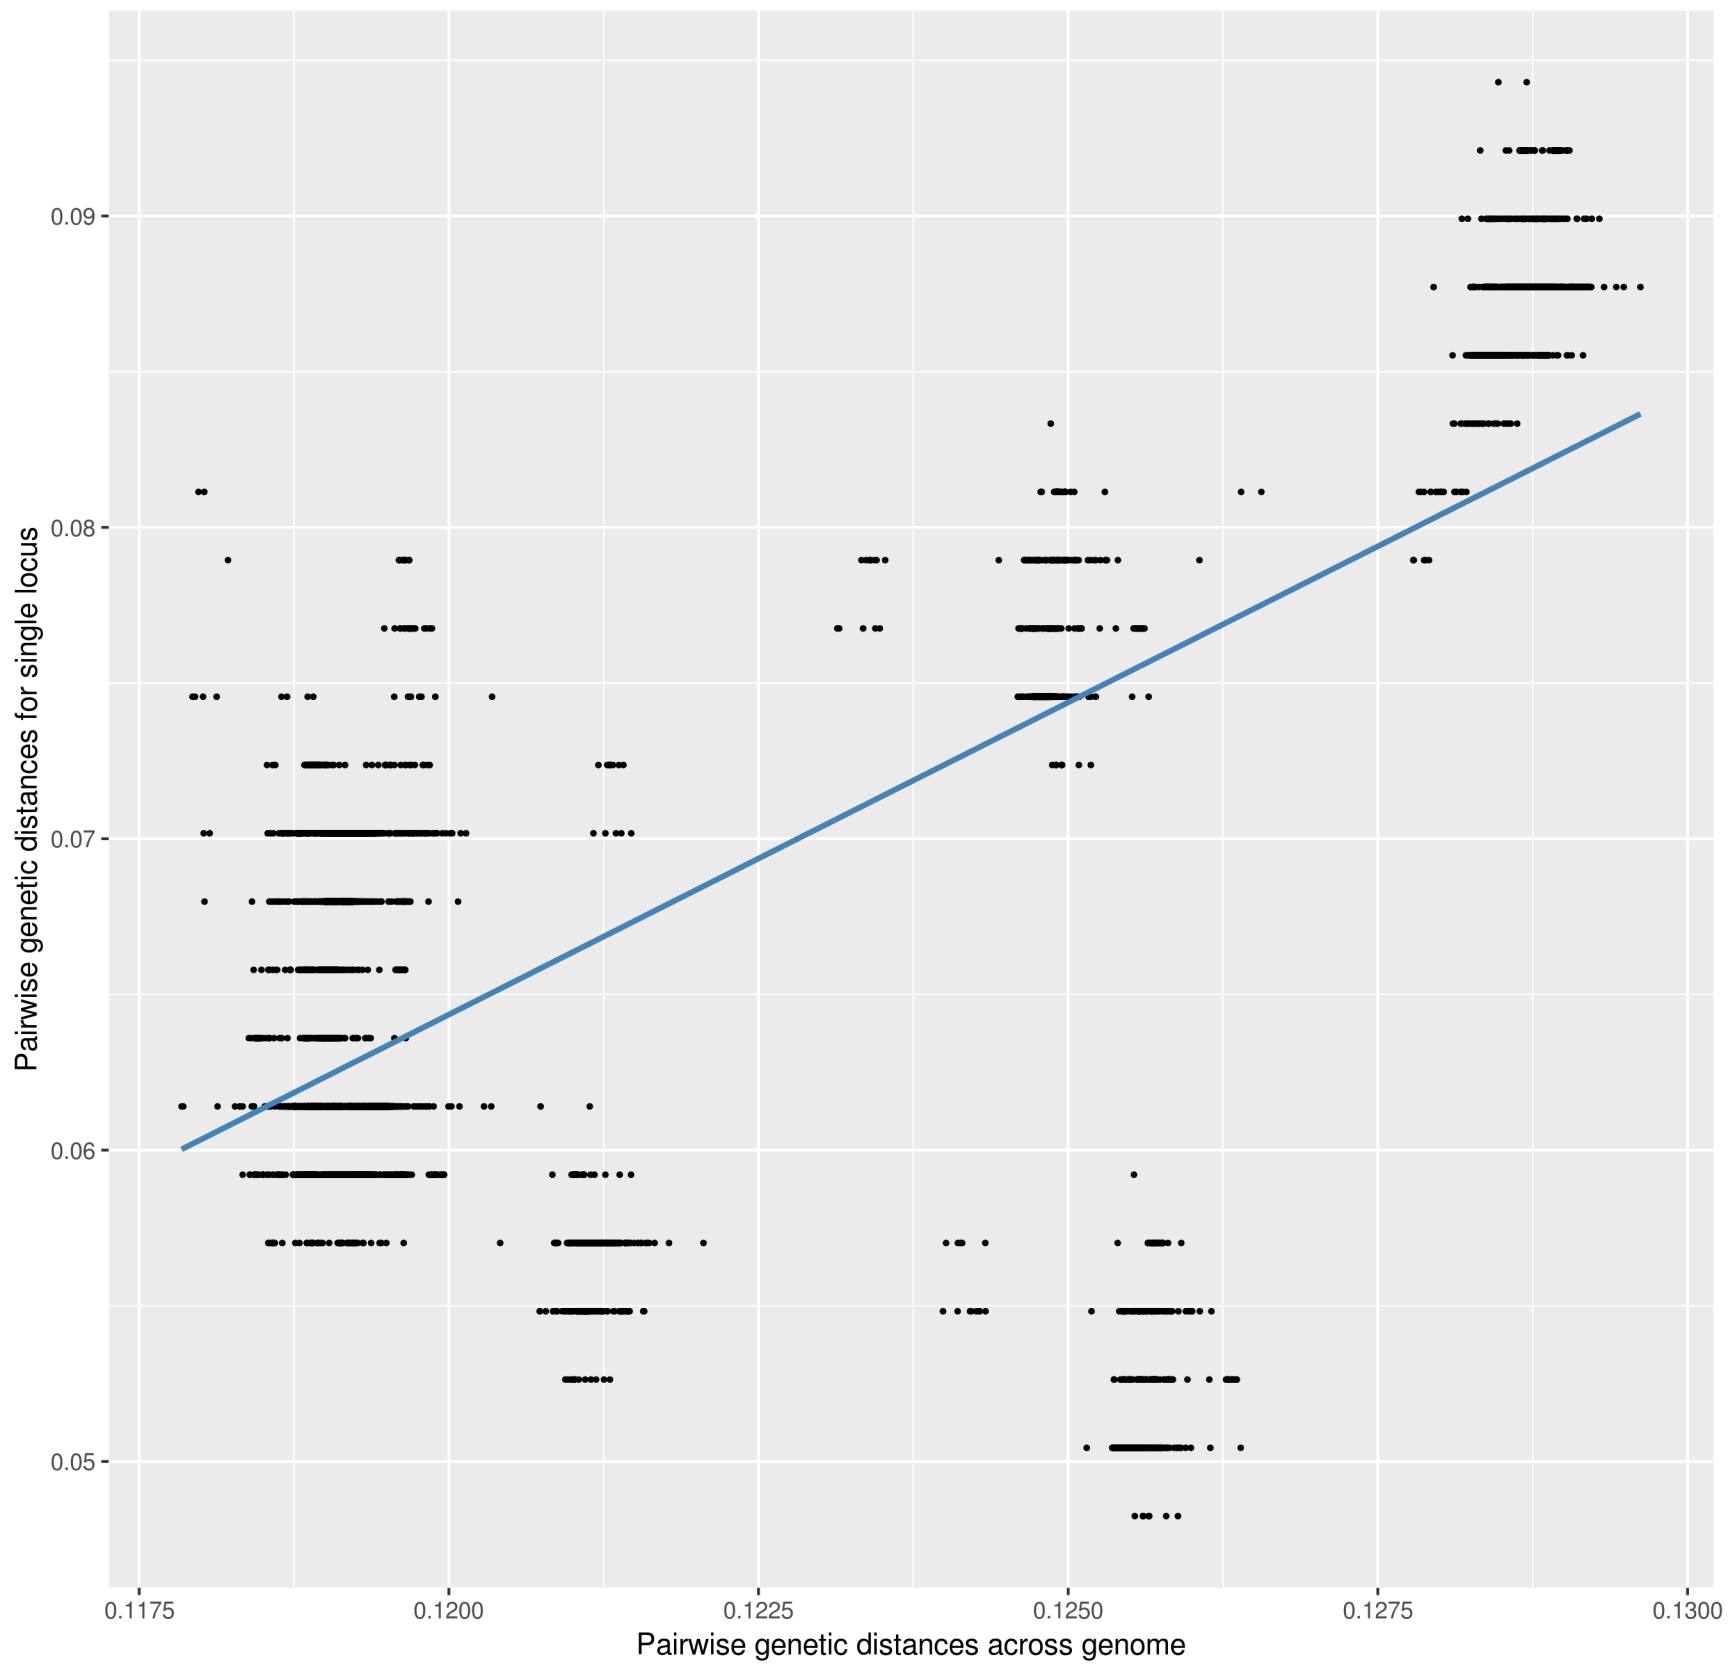

Supplement: Image_3.pdf [file Image_3.pdf]
